# Supplementary material for: Integrative multi-omics analysis reveals a novel subtype of hepatocellular carcinoma with biological and clinical relevance
Source: PubMed Central journal article supplement (PMC11659151; doi:10.3389/fimmu.2024.1517312), 2024-12-06

# High Ki67 expression

Tumor

Adjacent

Patient1

**XPO1**

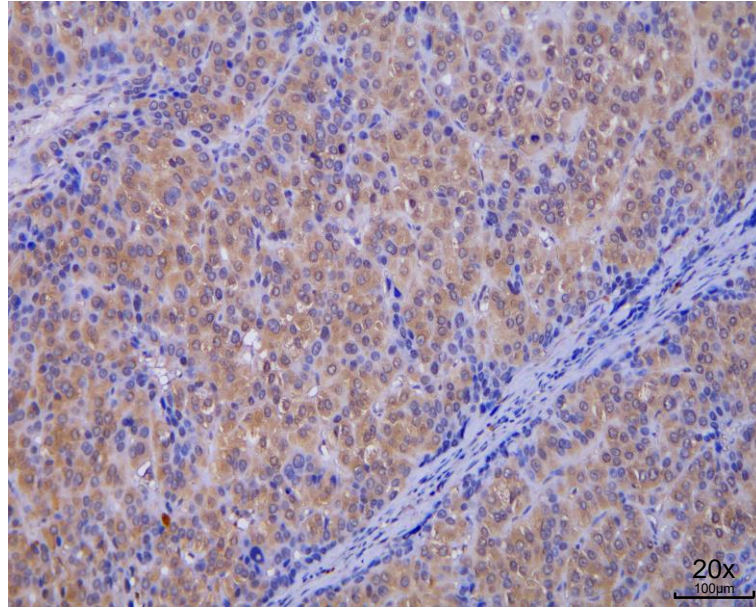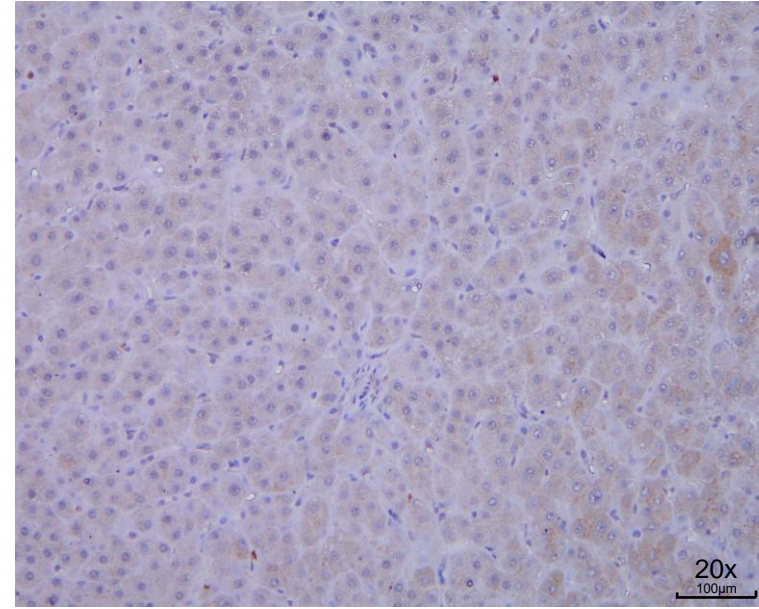

**RCN2**

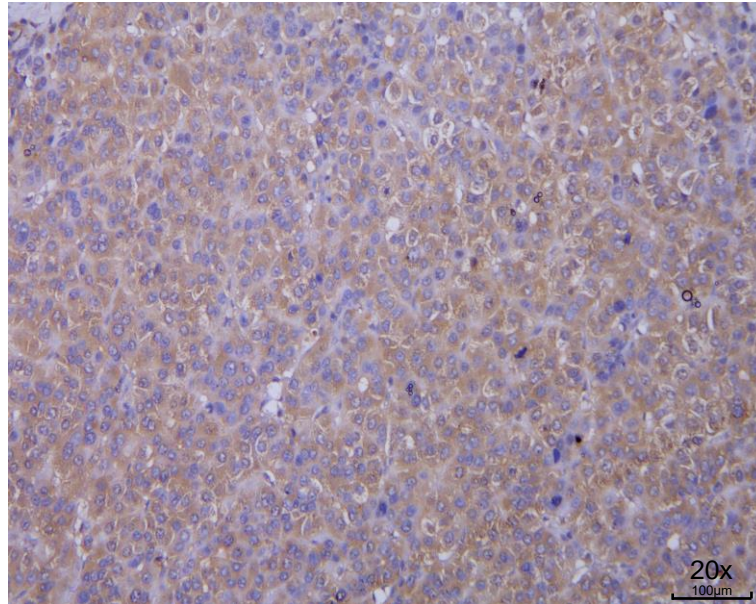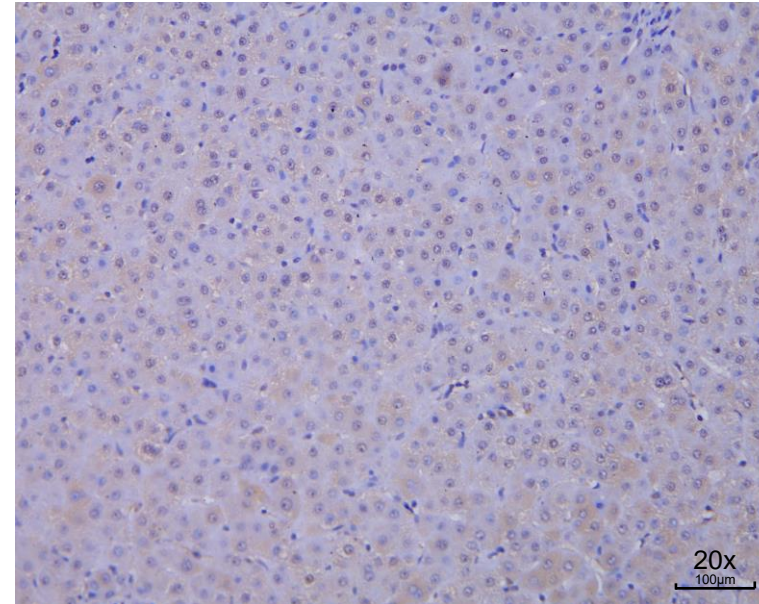



**High Ki67 expression**

Tumor

Adjacent

Patient2

**XPO1**

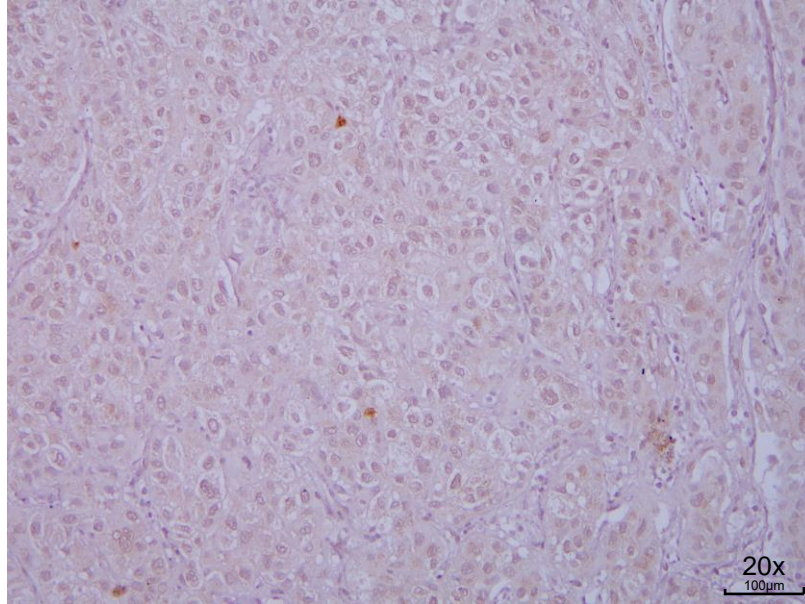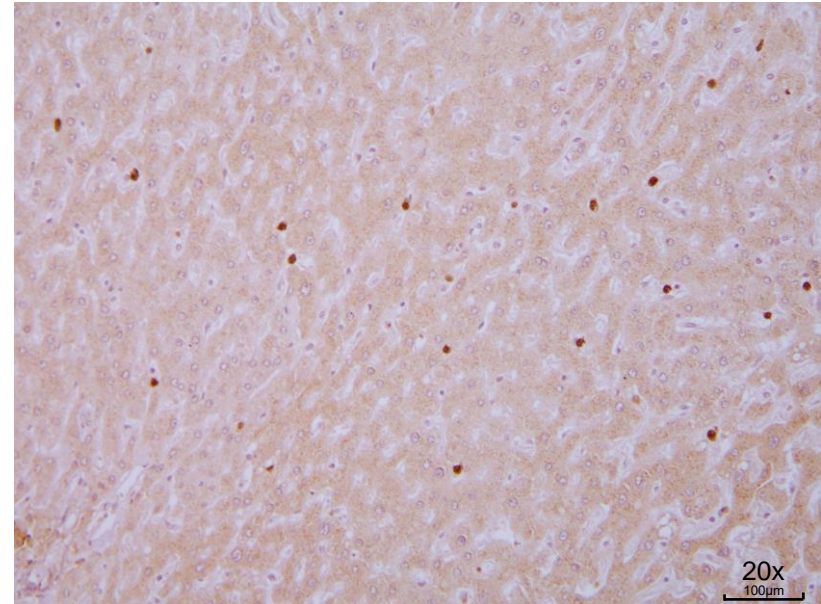

**RCN2**

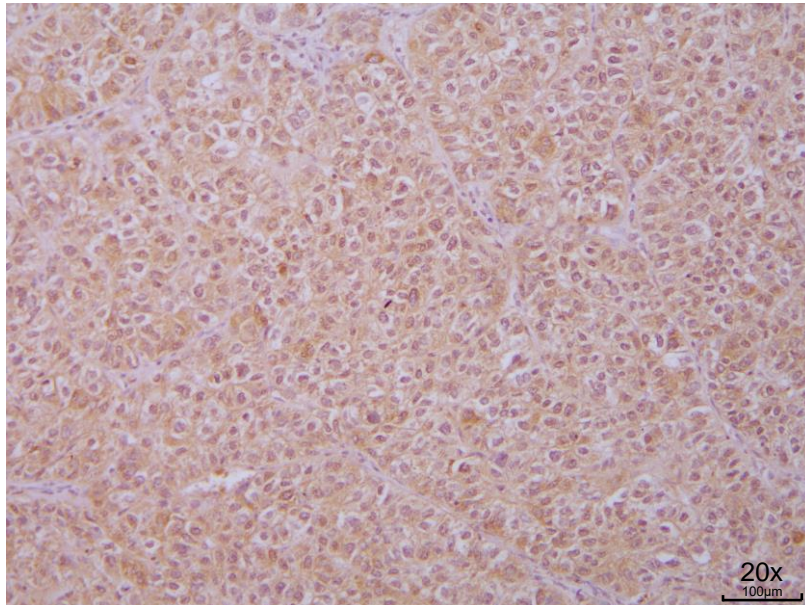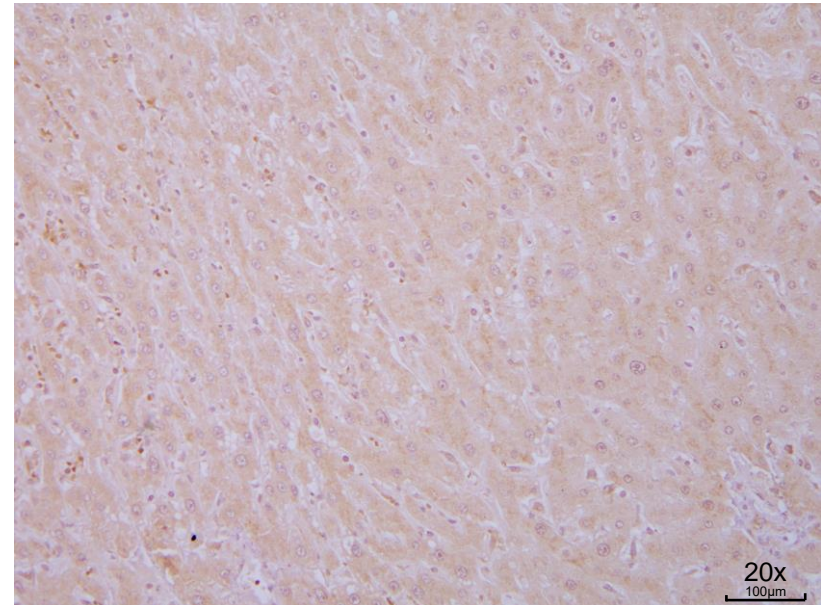



# High Ki67 expression

Patient3

Tumor

Adjacent

XPO1

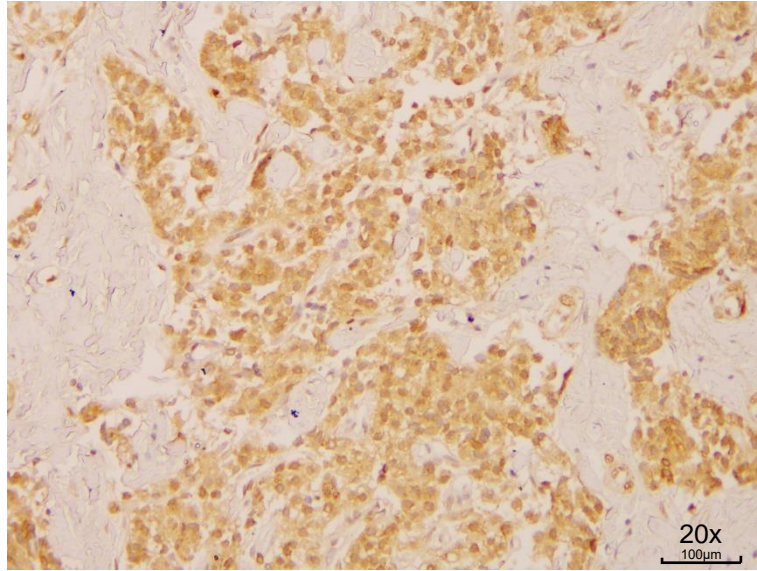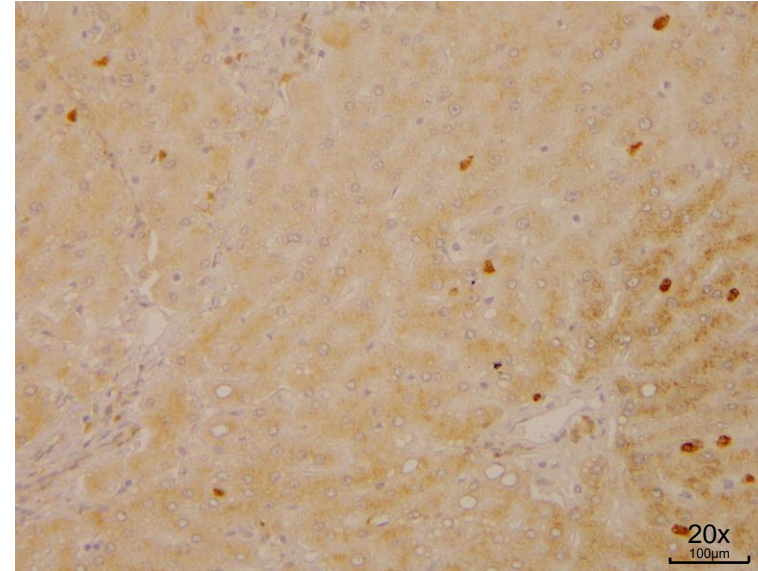

RCN2

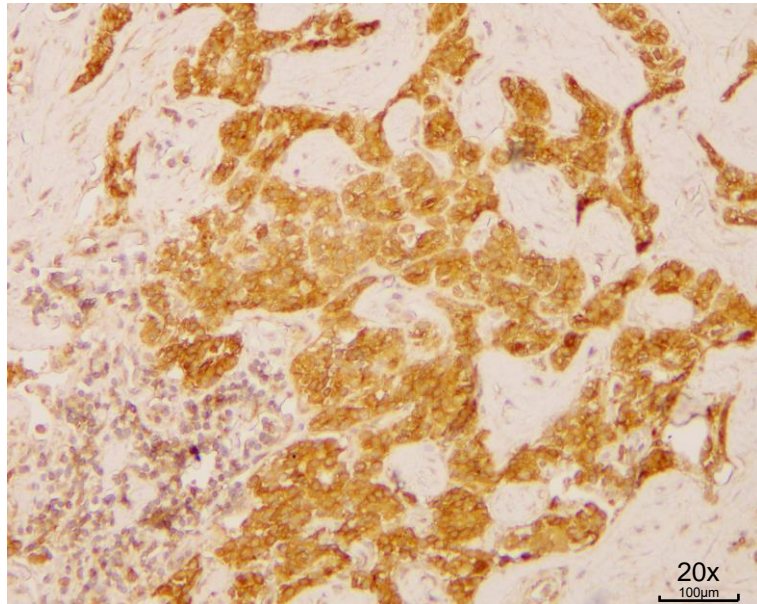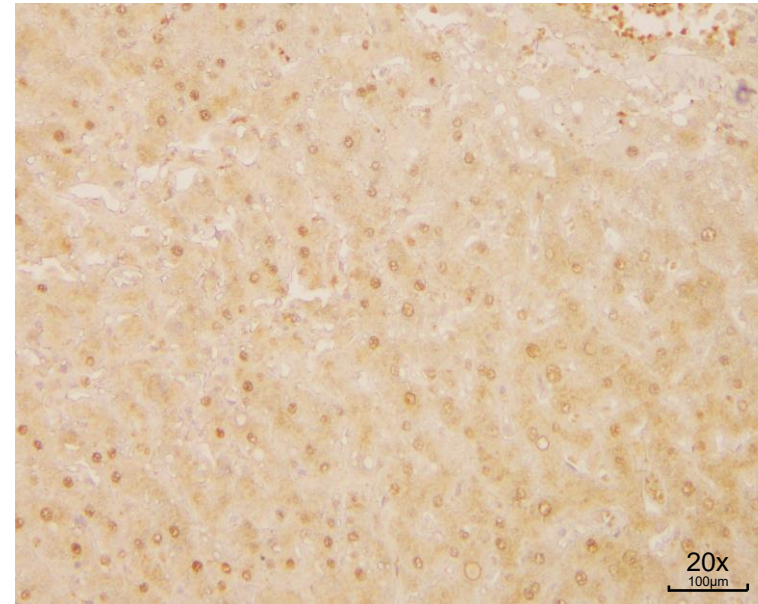



**High Ki67 expression**

Tumor

Adjacent

Patient4

**XPO1**

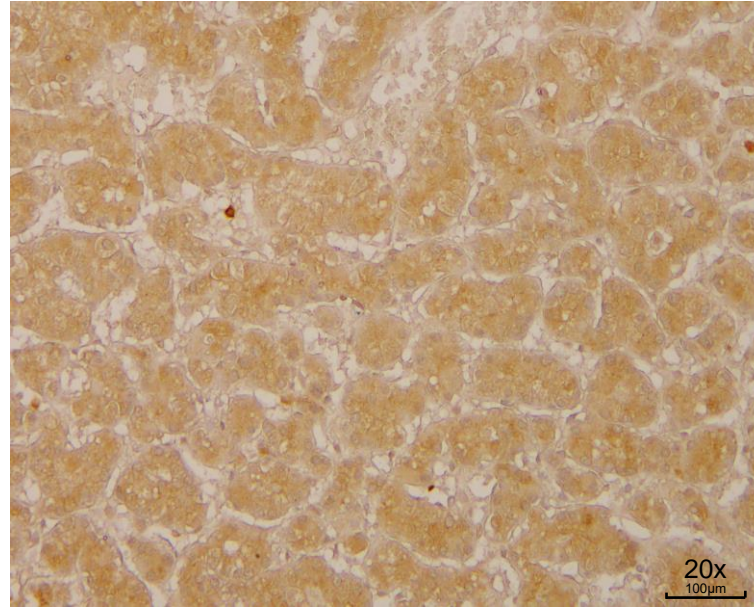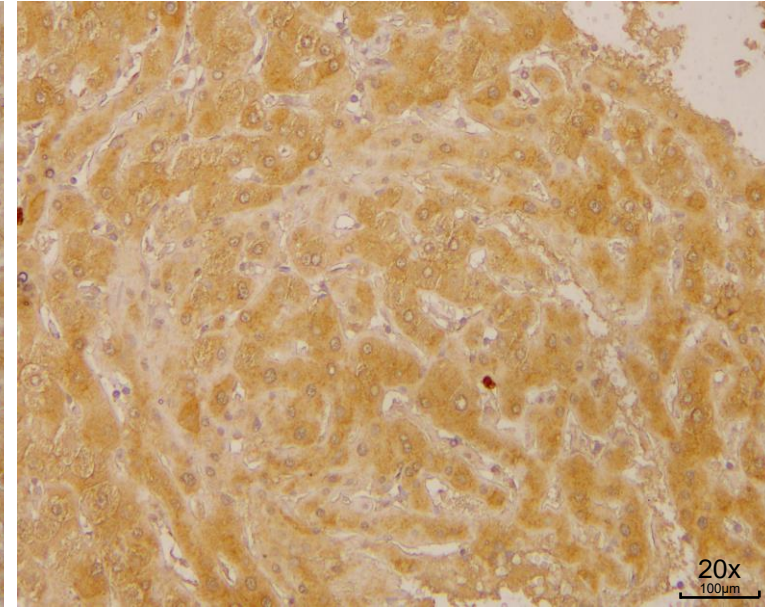

**RCN2**

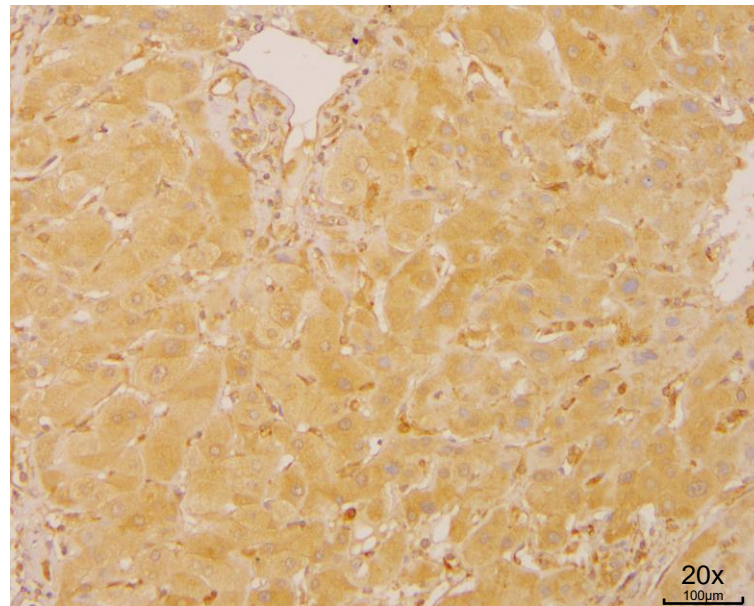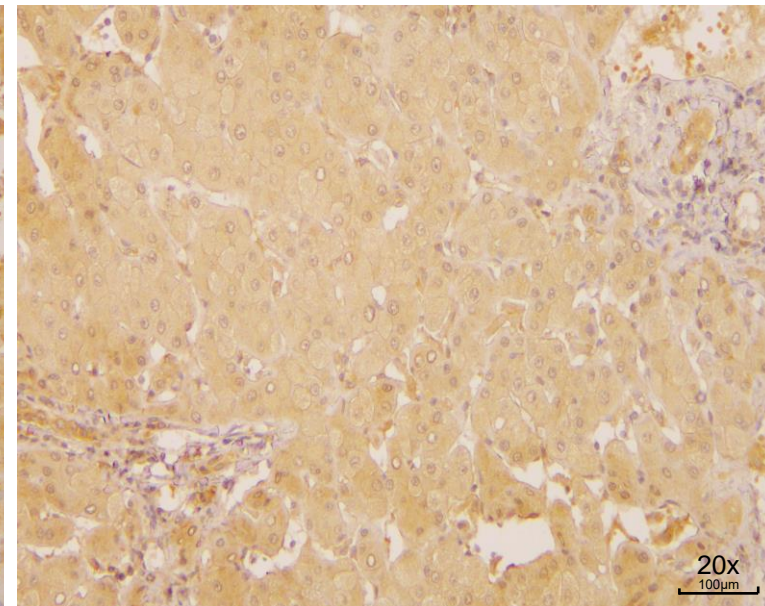



**High Ki67 expression**

Patient5

Tumor

Adjacent

**XPO1**

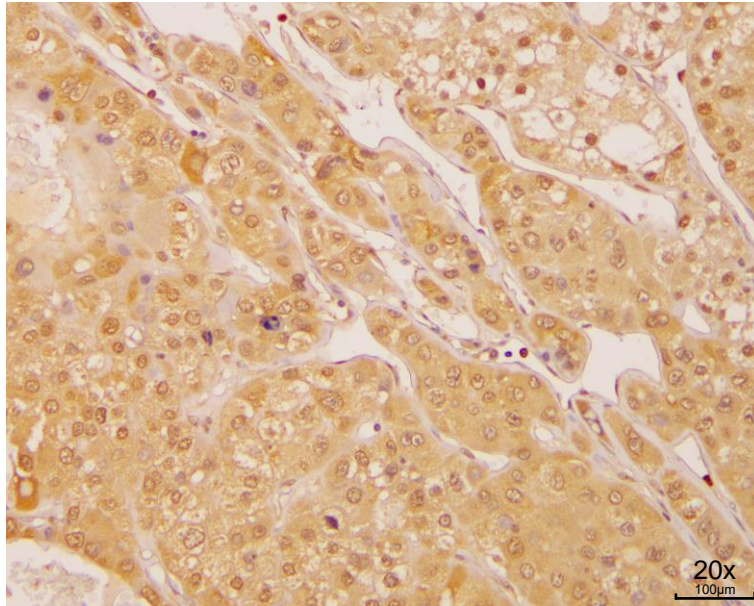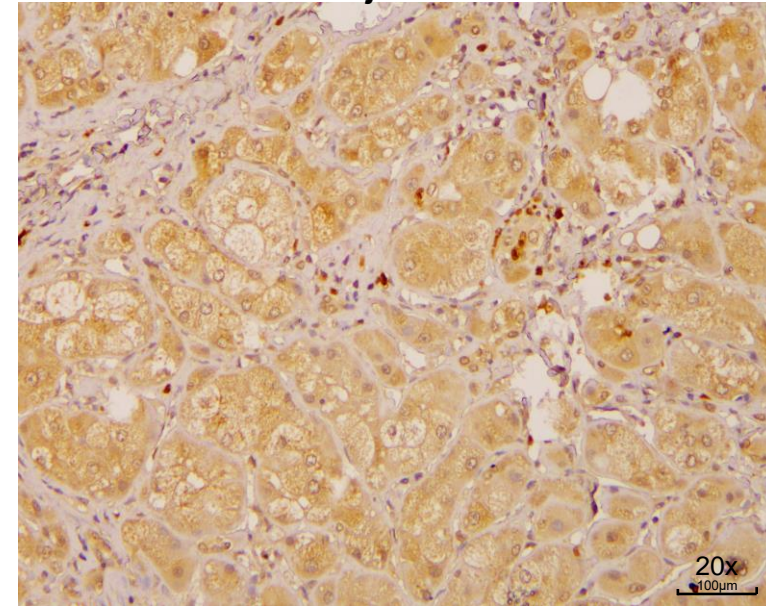

**RCN2**

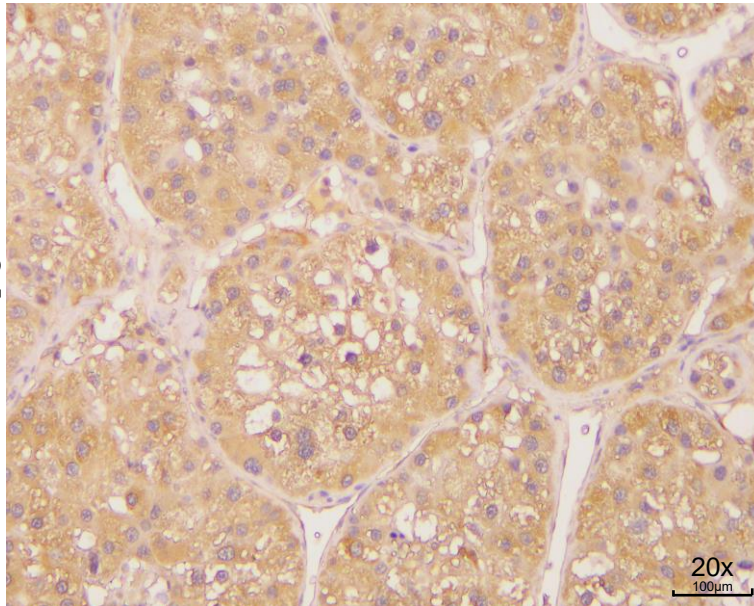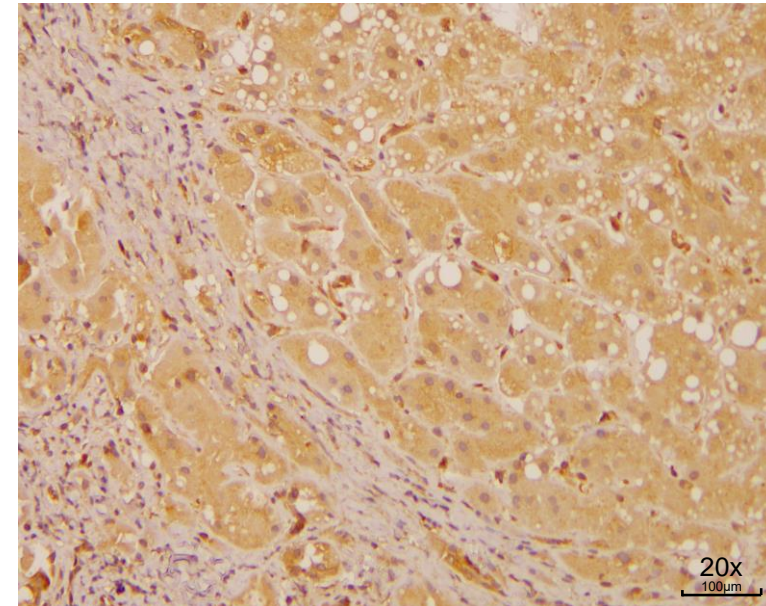



**High Ki67 expression**

Tumor

Adjacent

Patient 6

**XPO1**

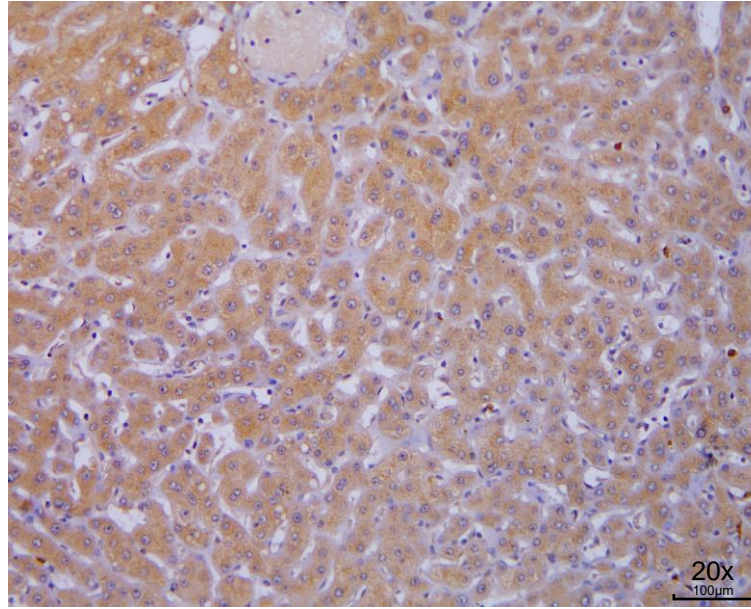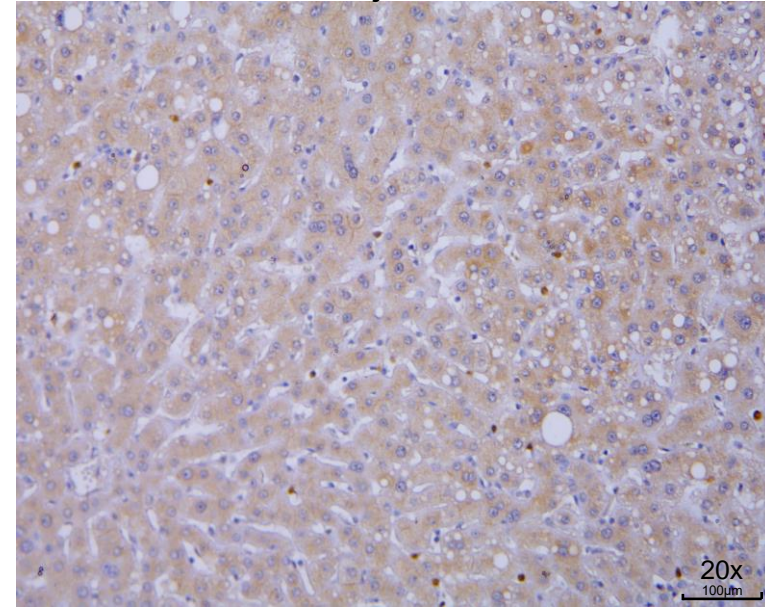

**RCN2**

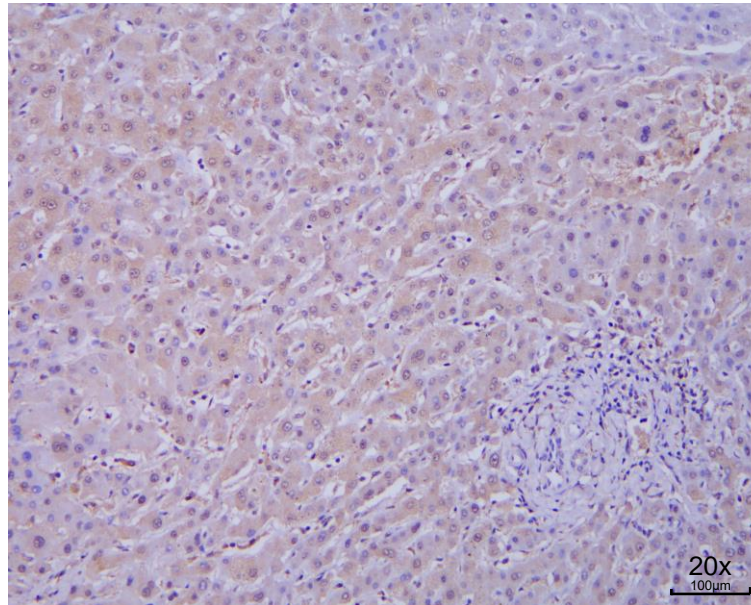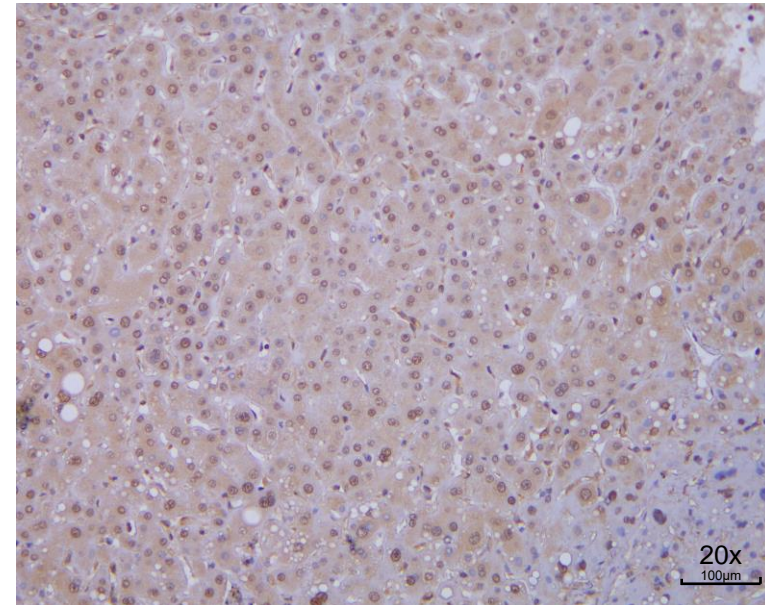



# High Ki67 expression

Patient 7

Tumor

Adjacent

XPO1

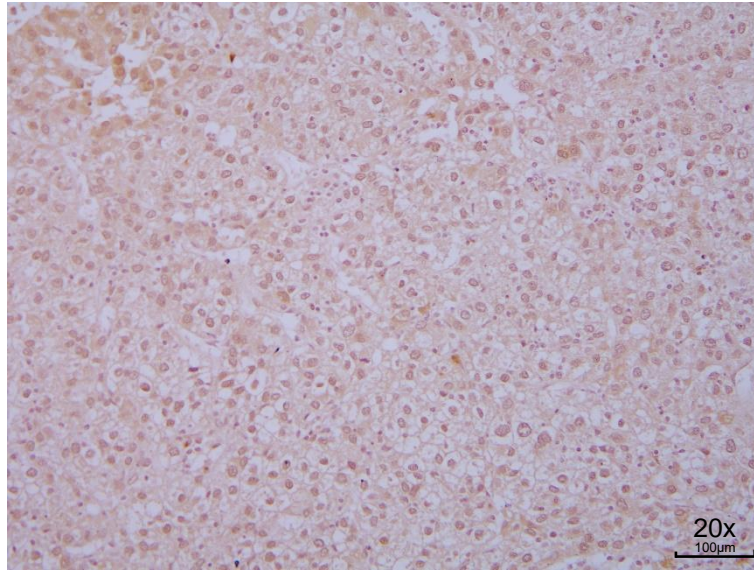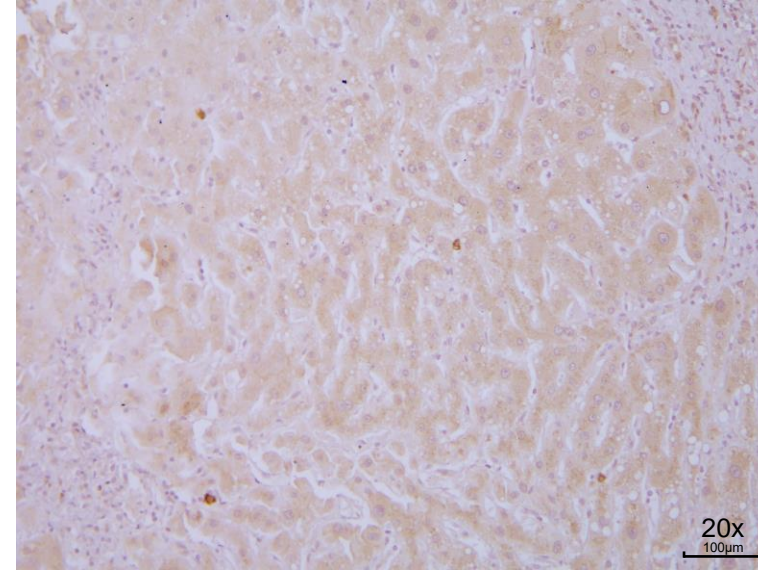

RCN2

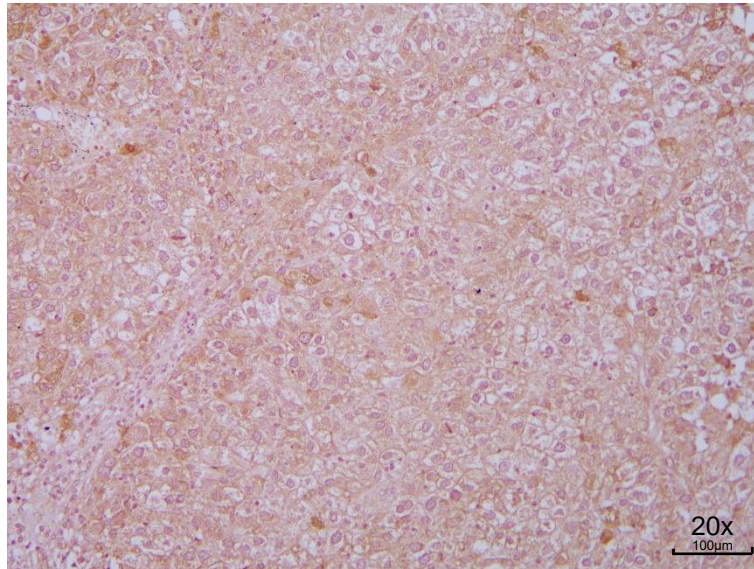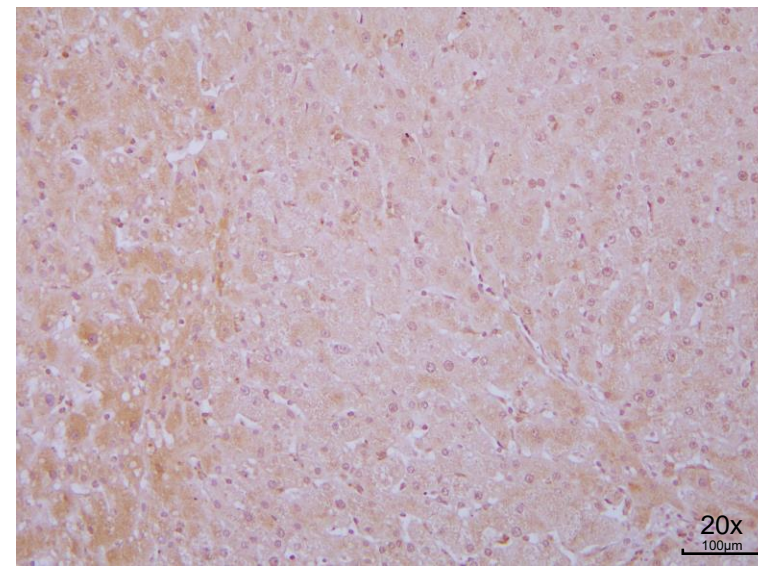



**High Ki67 expression**

Patient 8

Tumor

Adjacent

**XPO1**

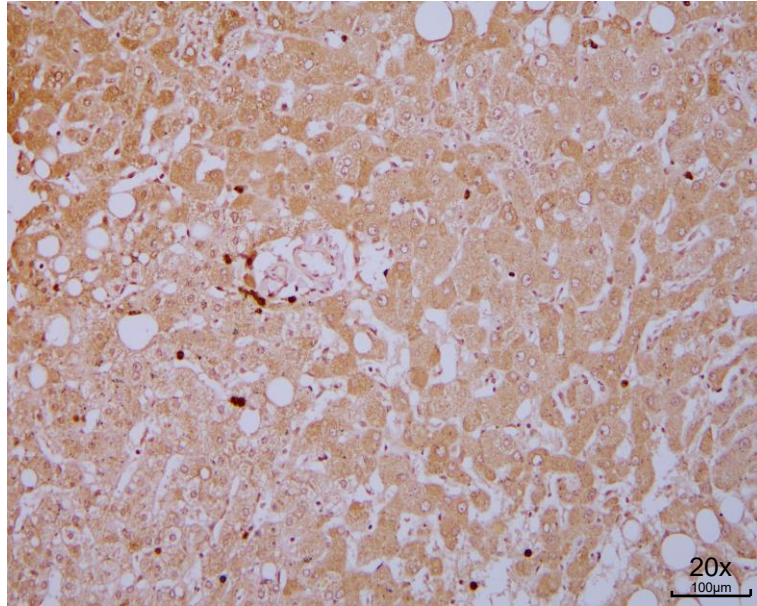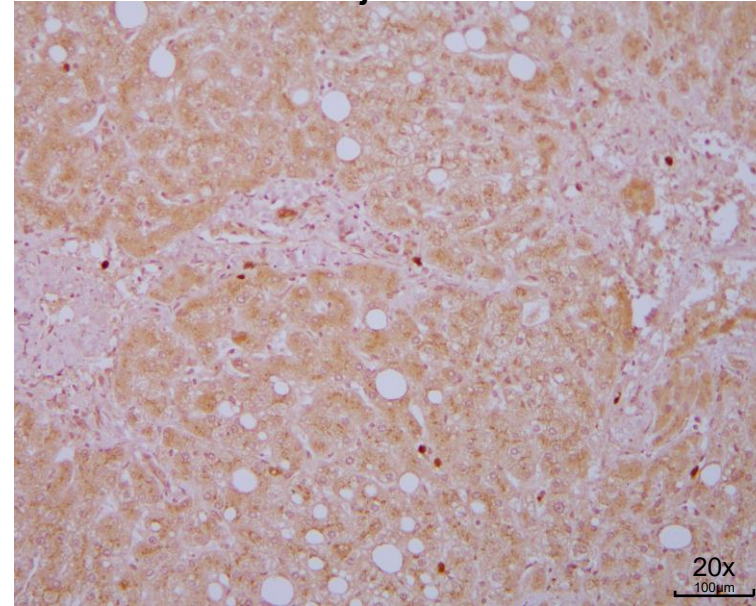

**RCN2**

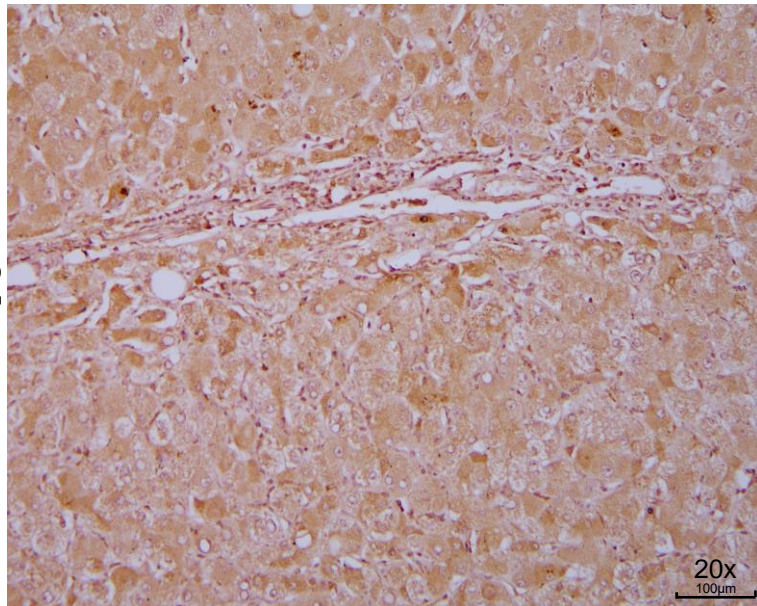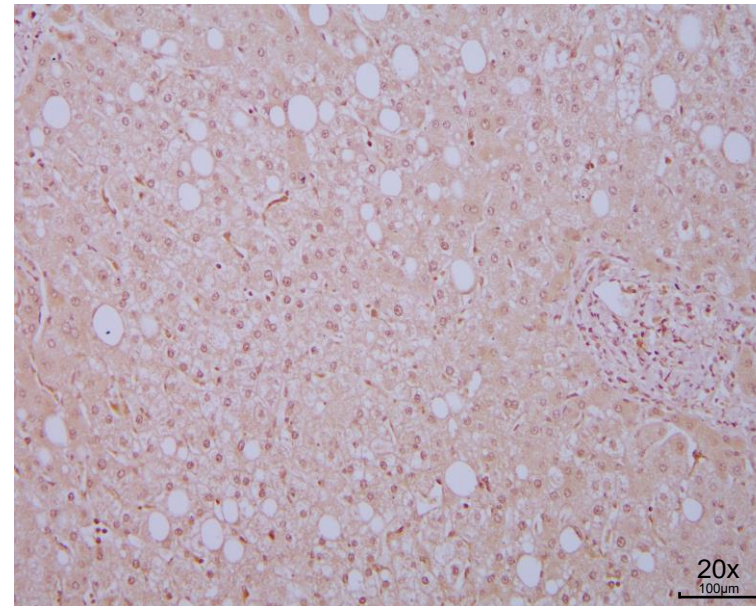



**High Ki67 expression**

Patient 9

Tumor

Adjacent

**XPO1**

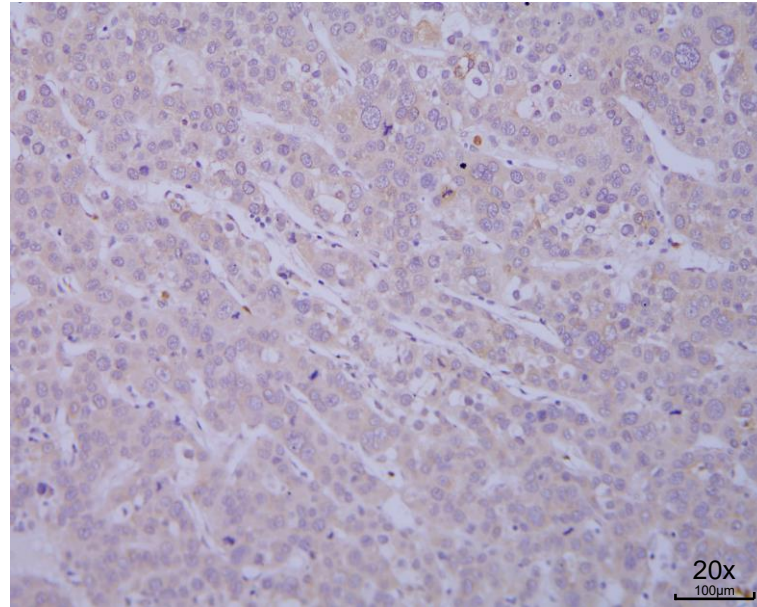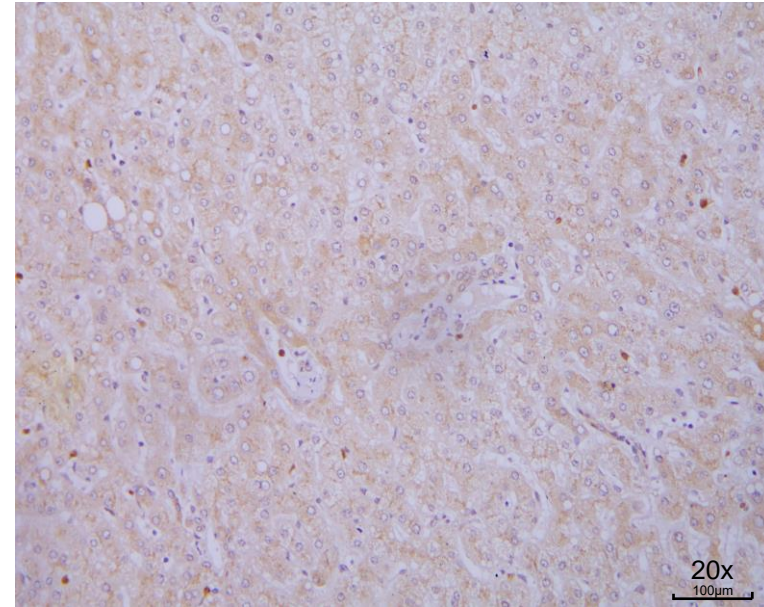

**RCN2**

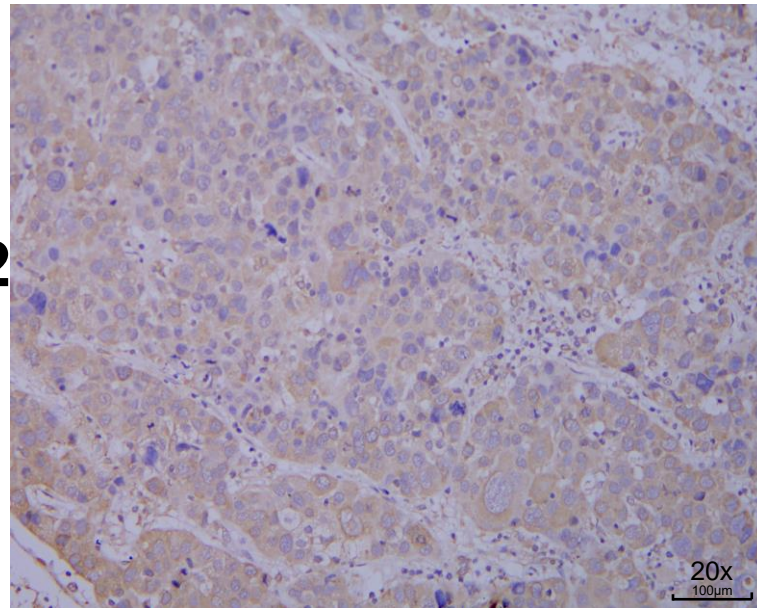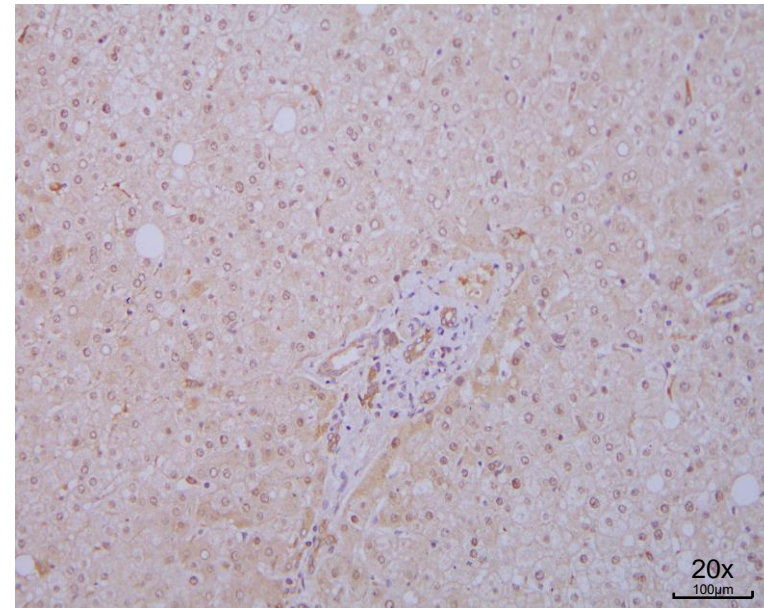



# High Ki67 expression

Patient 10

Tumor

Adjacent

XPO1

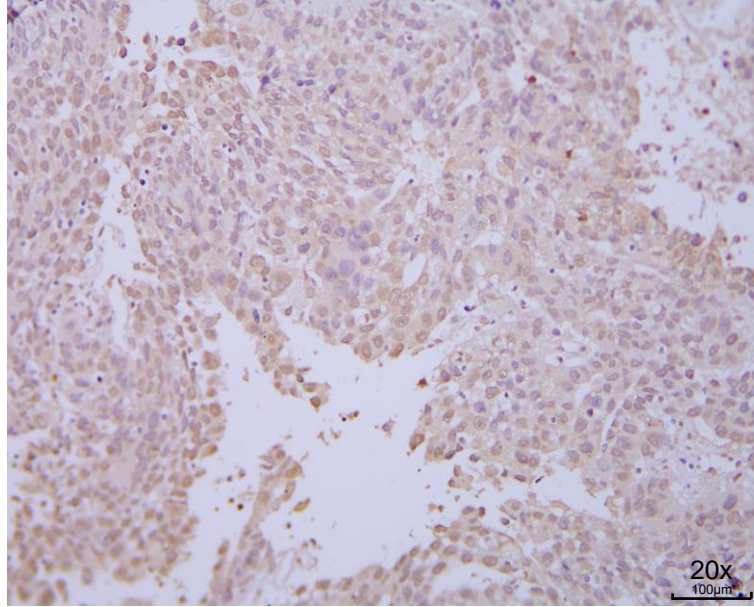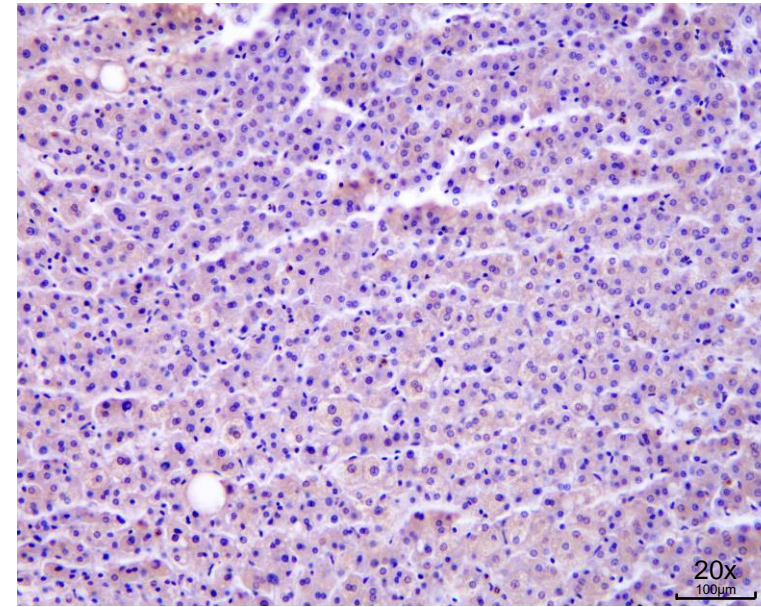

RCN2

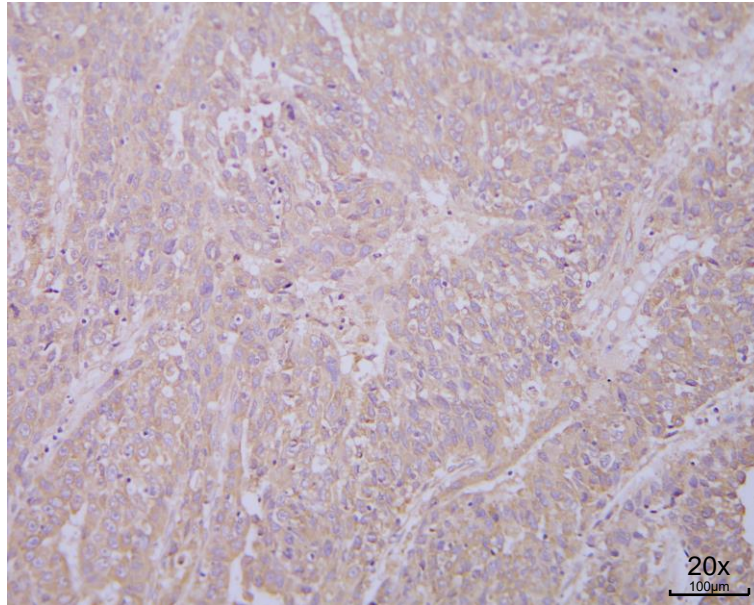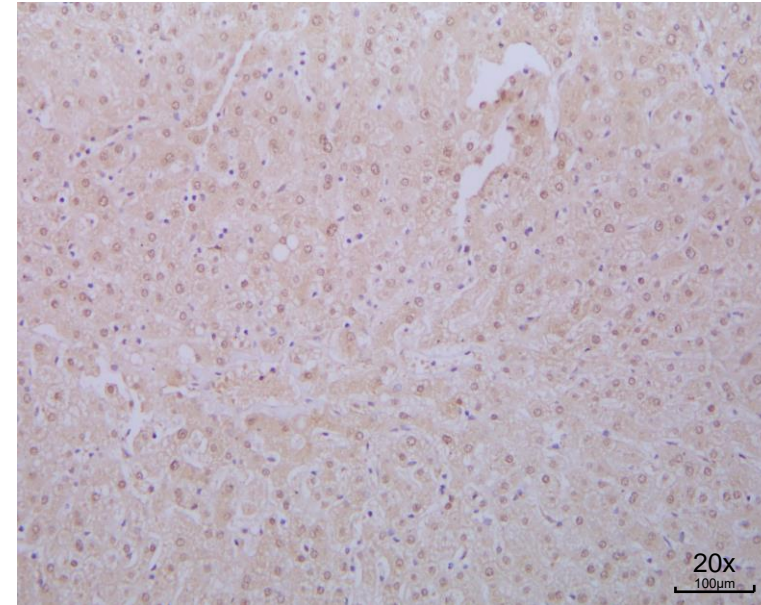



# High Ki67 expression

Patient 11

Tumor

Adjacent

XPO1

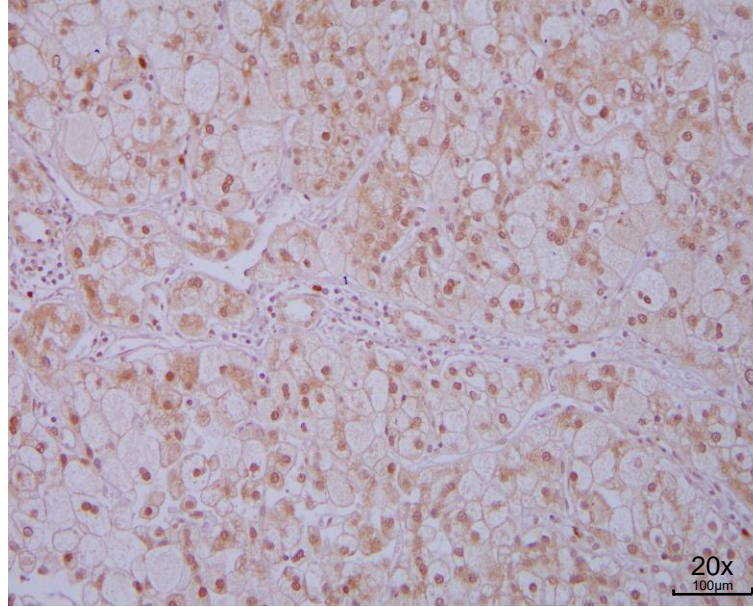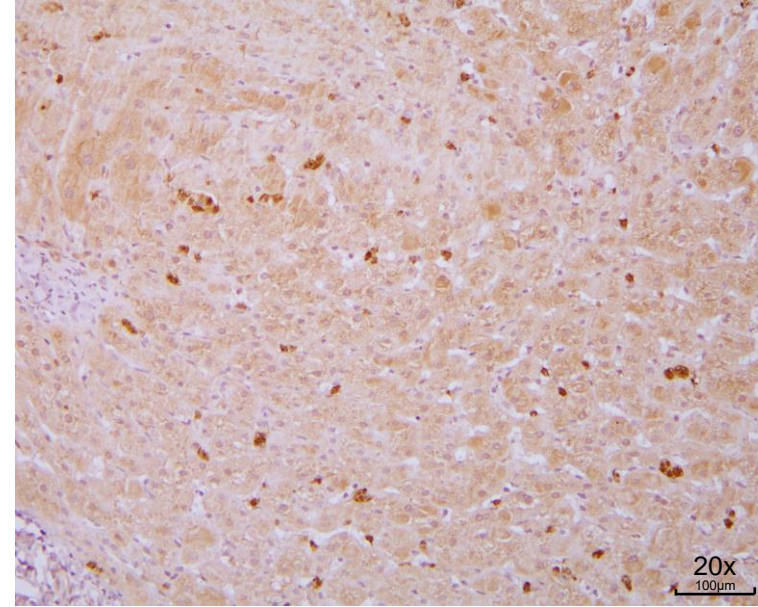

RCN2

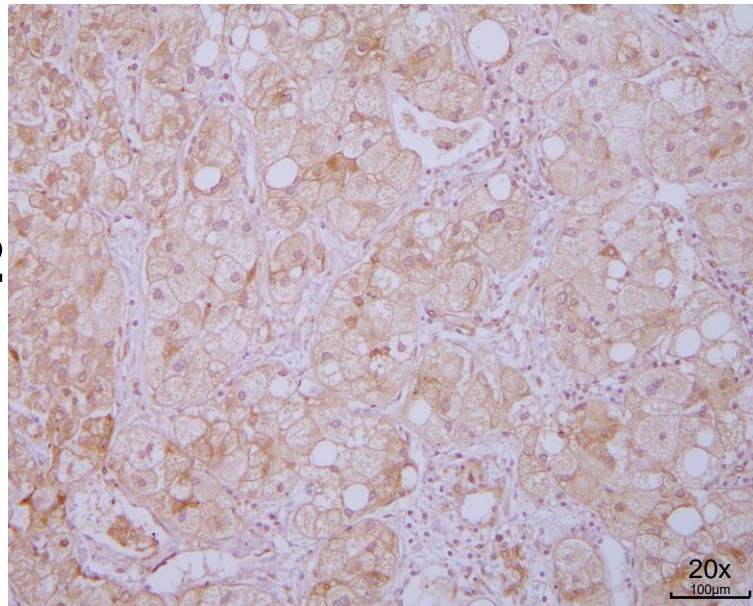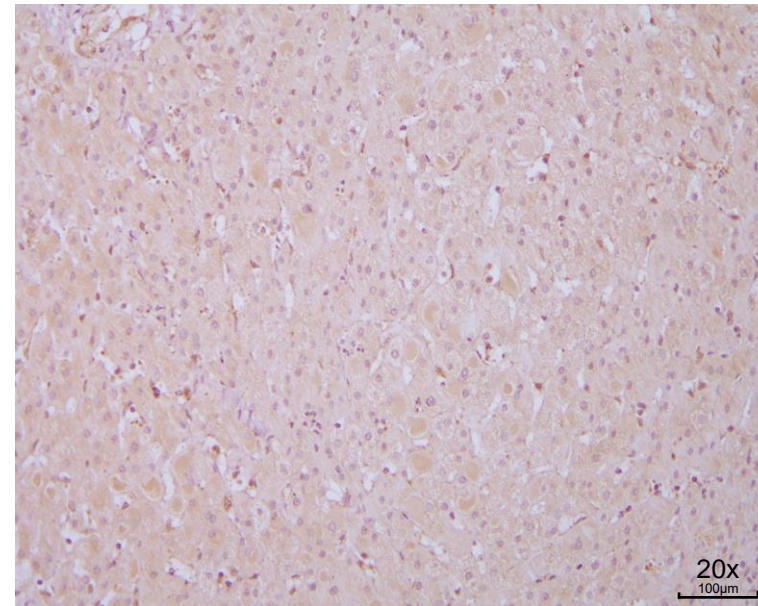



**High Ki67 expression**

Patient 12

Tumor

Adjacent

**XPO1**

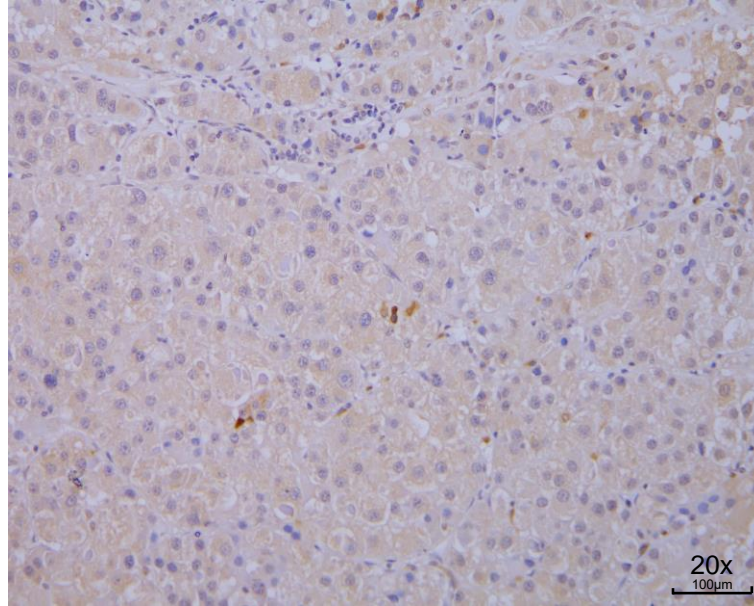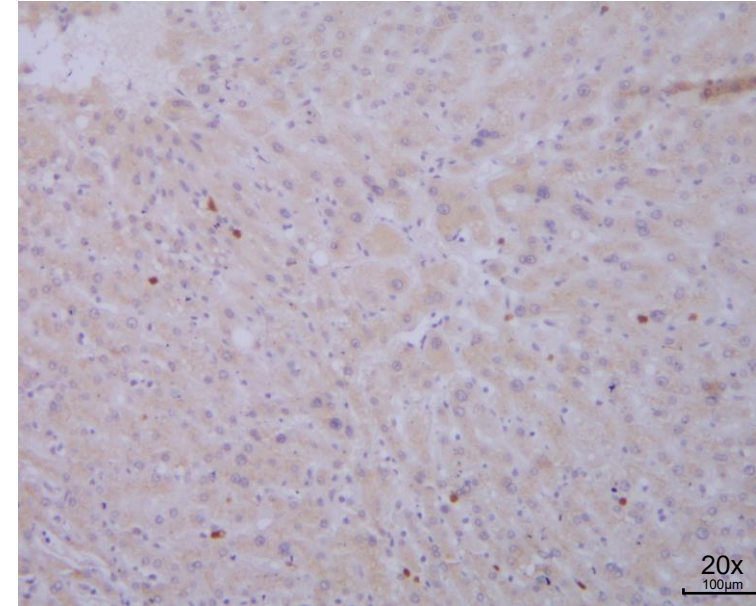

**RCN2**

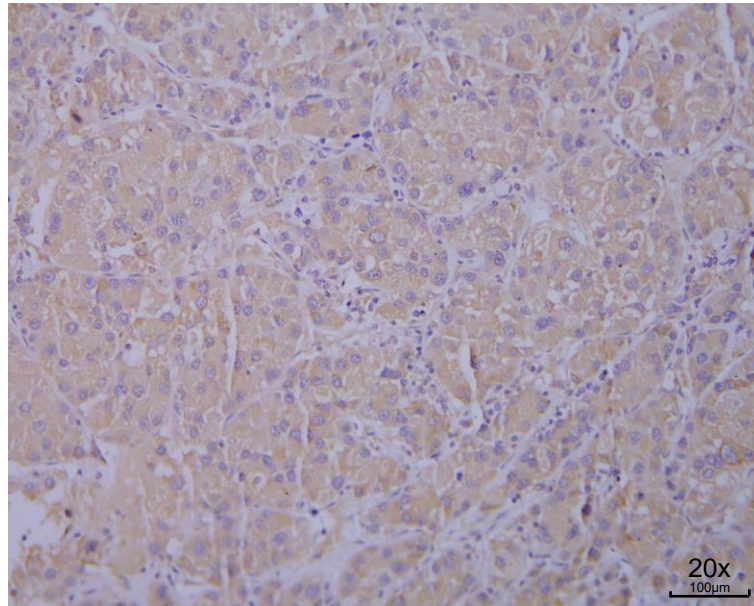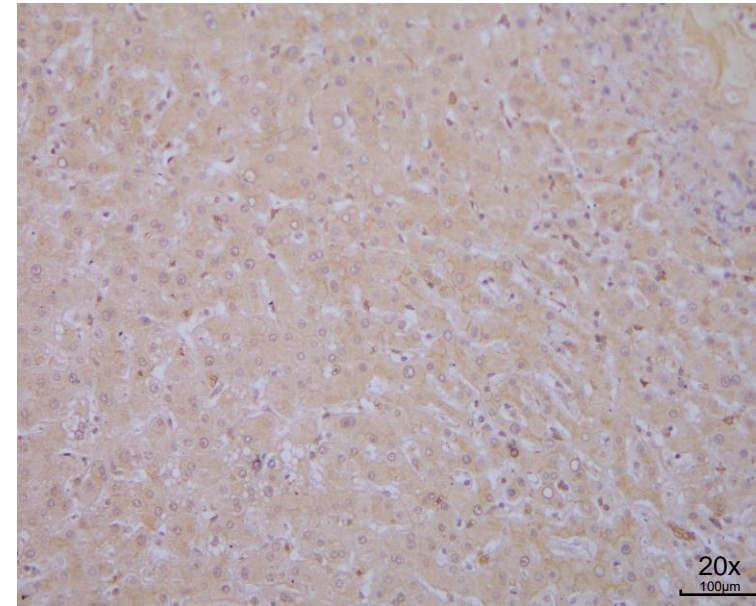



**High Ki67 expression**

Patient 13

Tumor

Adjacent

**XPO1**

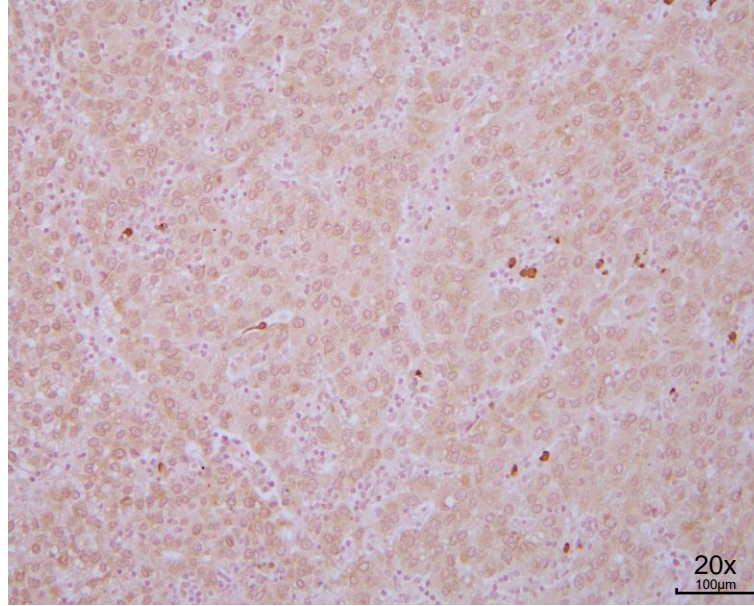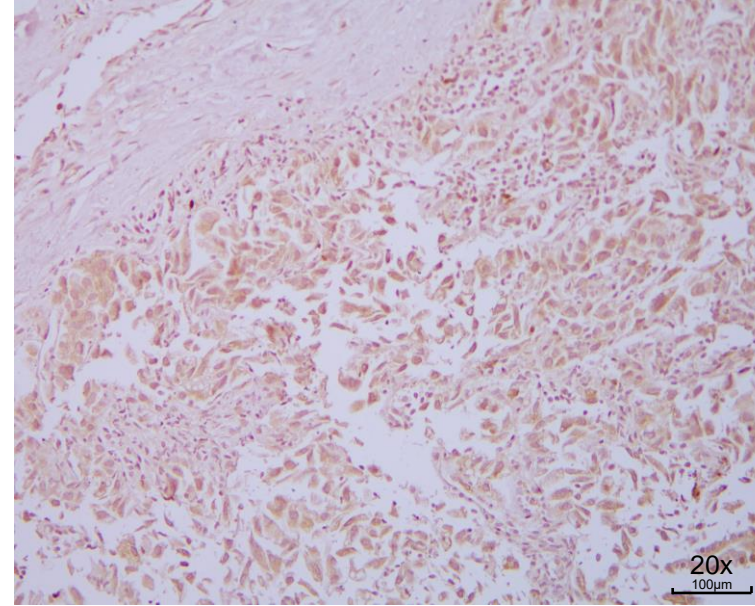

**RCN2**

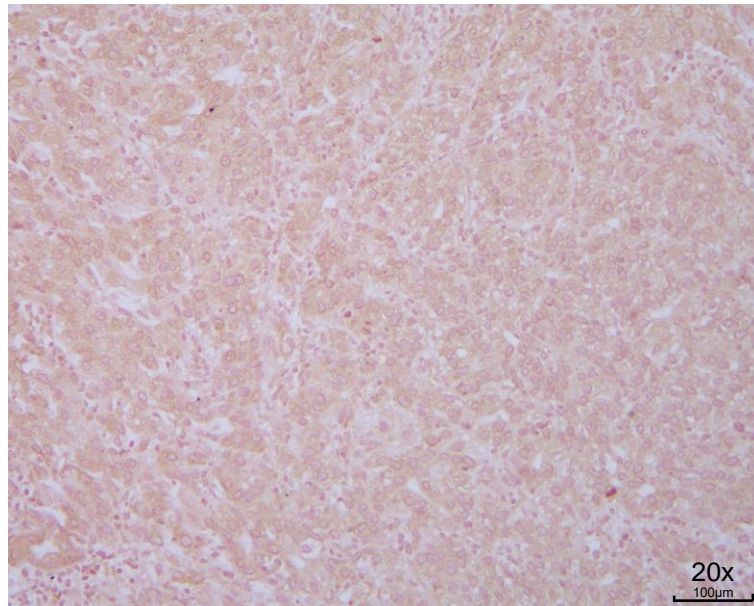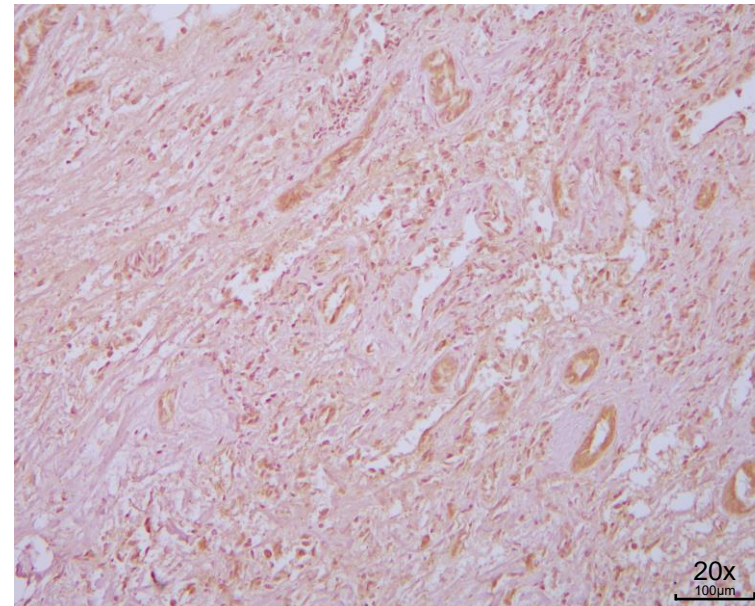



**High Ki67 expression**

Patient 14

Tumor

Adjacent

**XPO1**

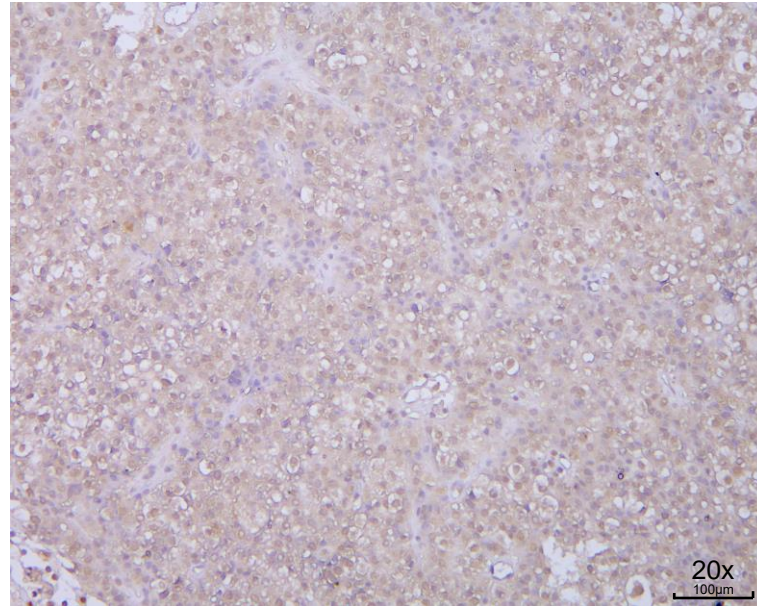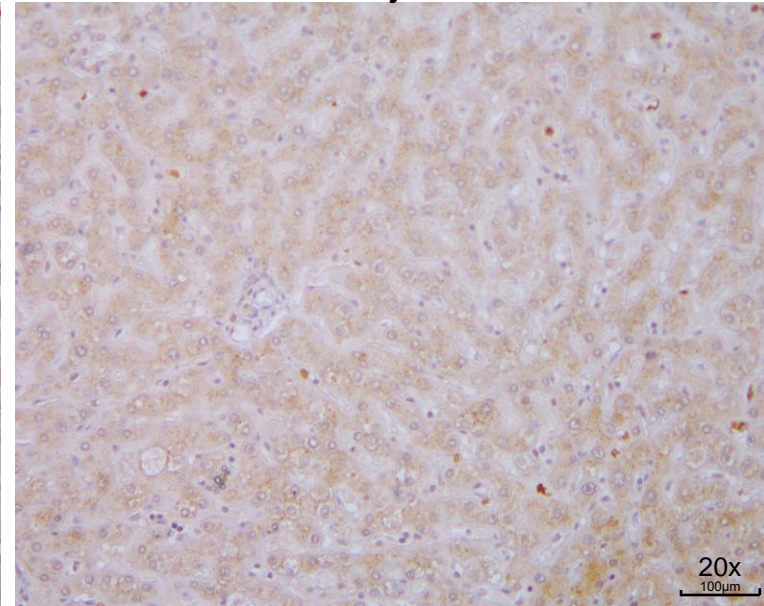

**RCN2**

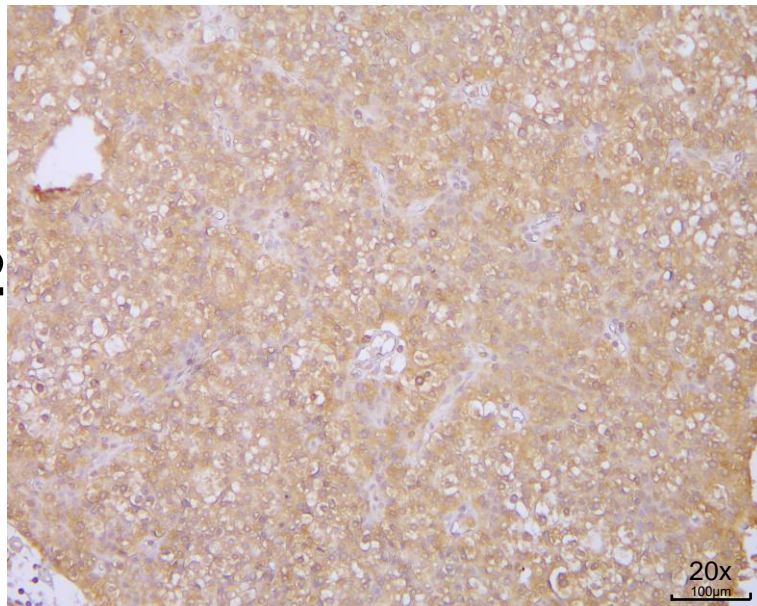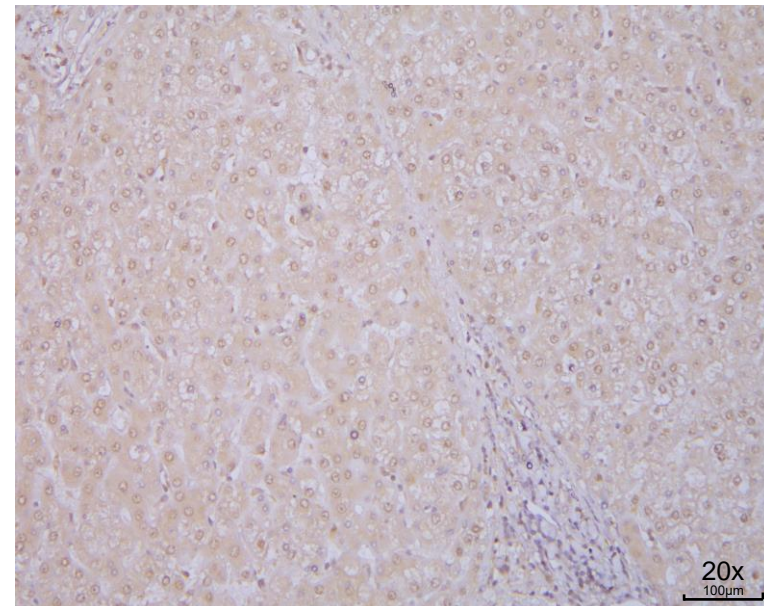



**High Ki67 expression**

Patient 15

Tumor

Adjacent

**XPO1**

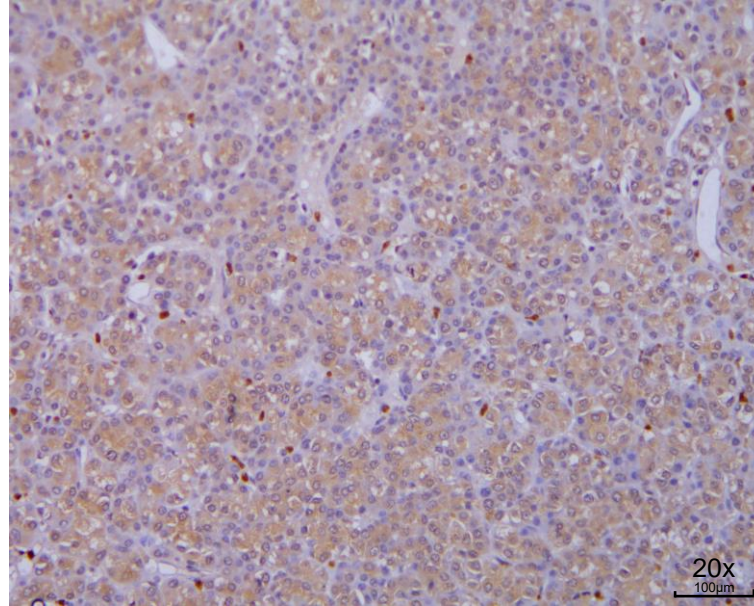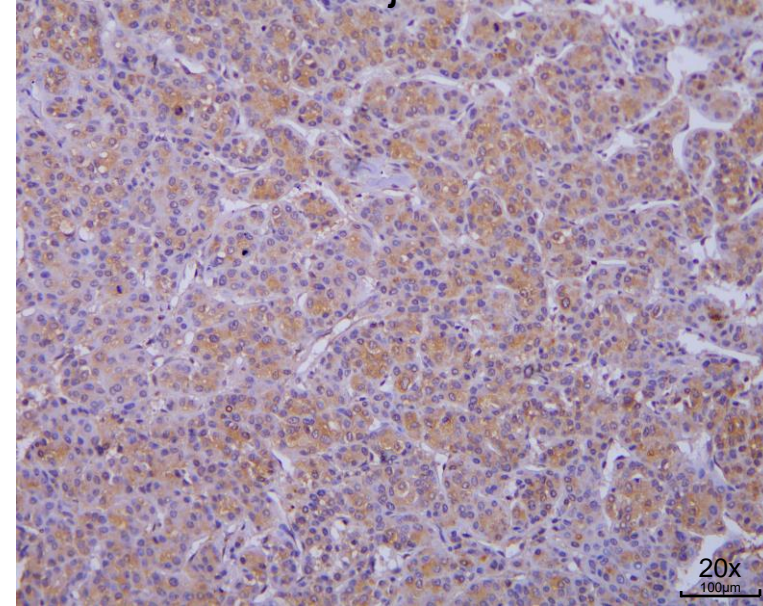

**RCN2**

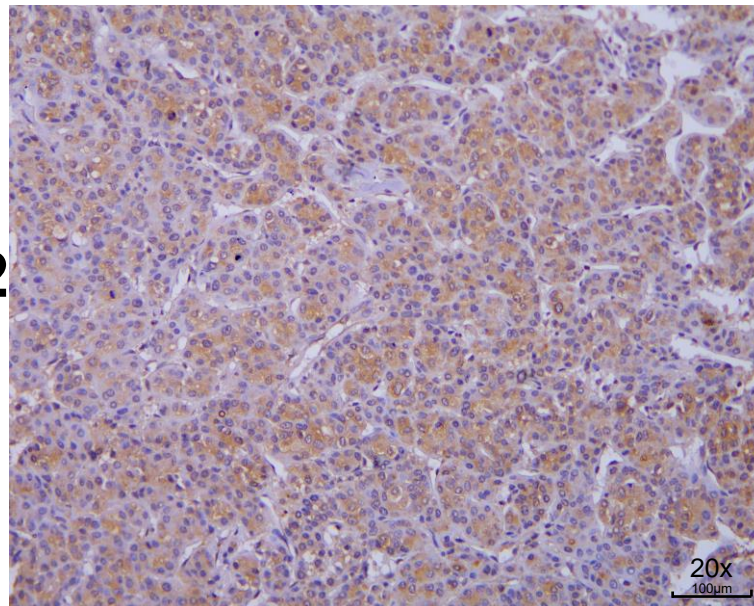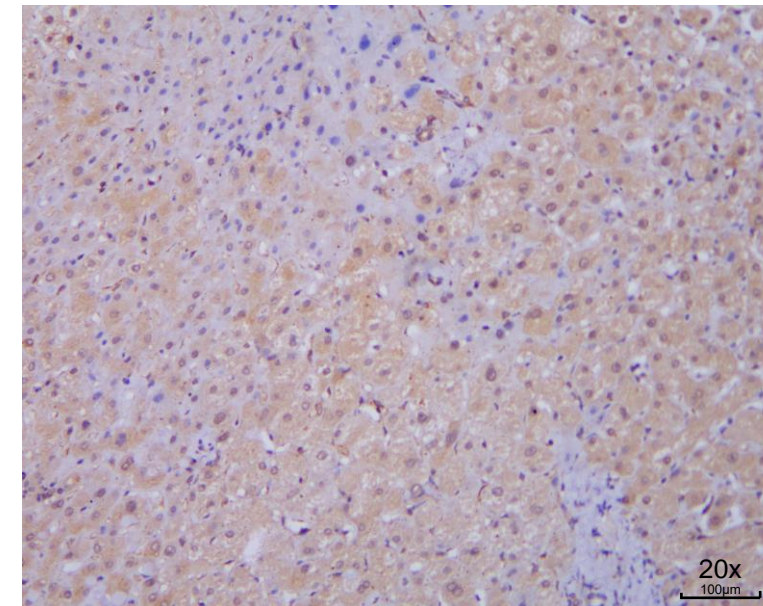



**High Ki67 expression**

Patient 16

Tumor

Adjacent

**XPO1**

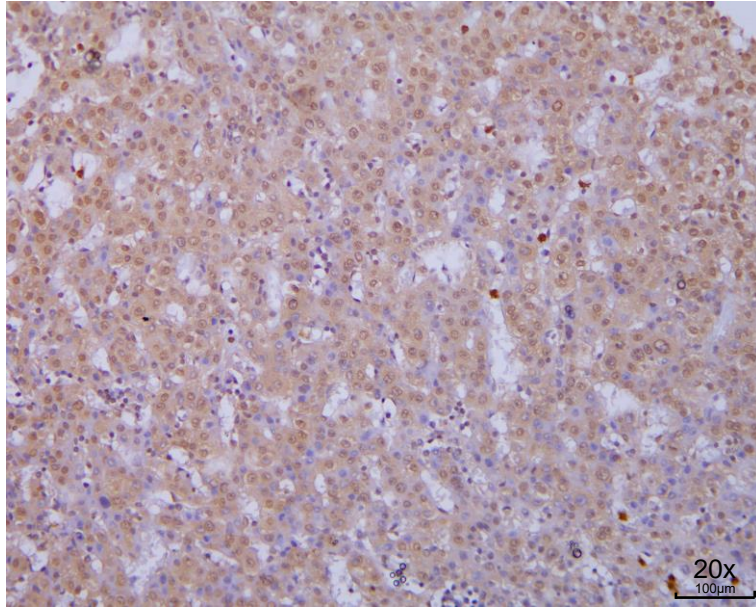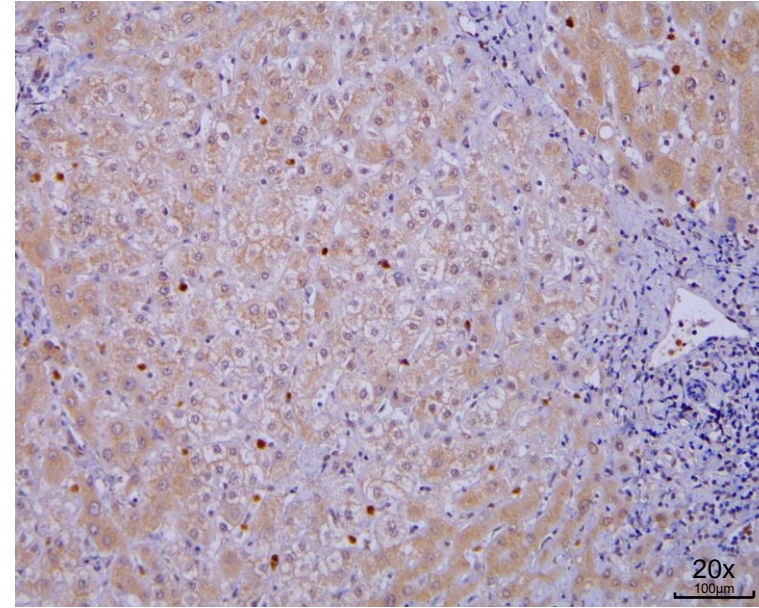

**RCN2**

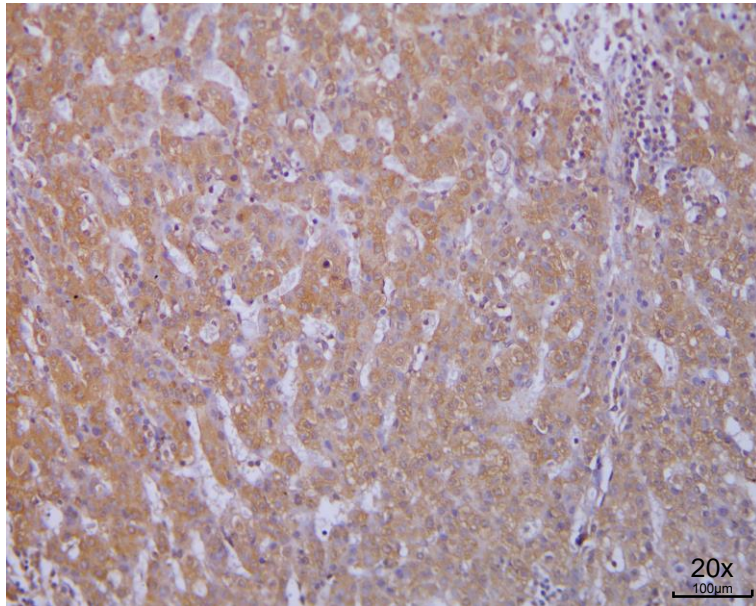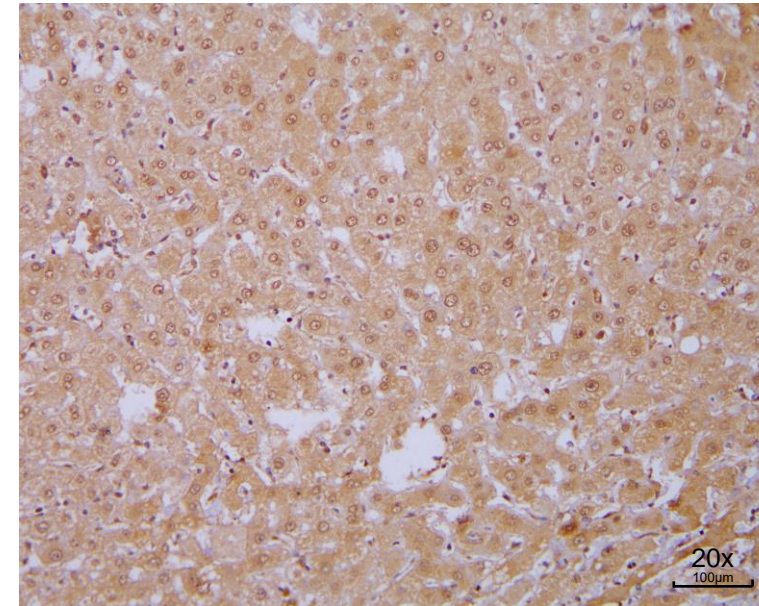



**High Ki67 expression**

Patient 17

Tumor

Adjacent

**XPO1**

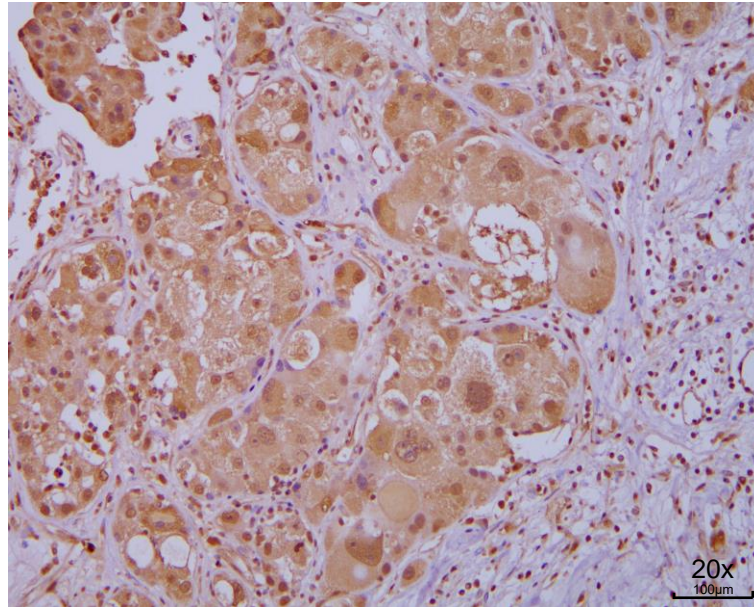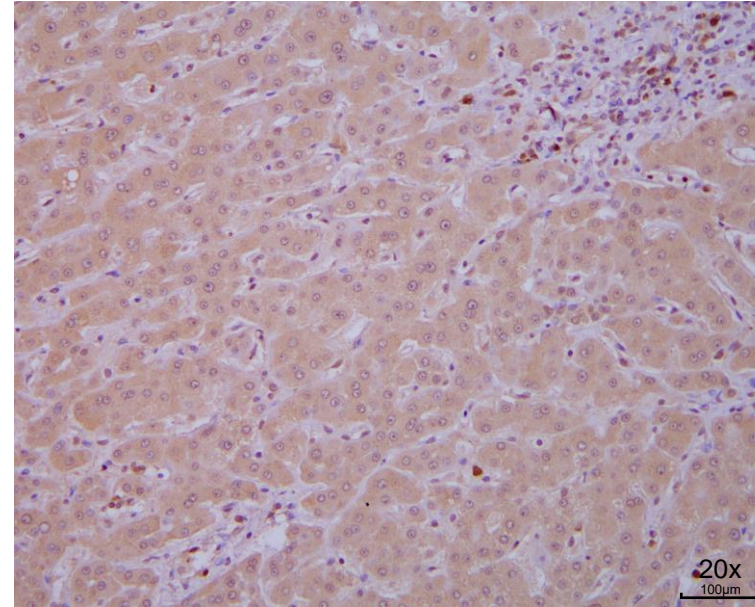

**RCN2**

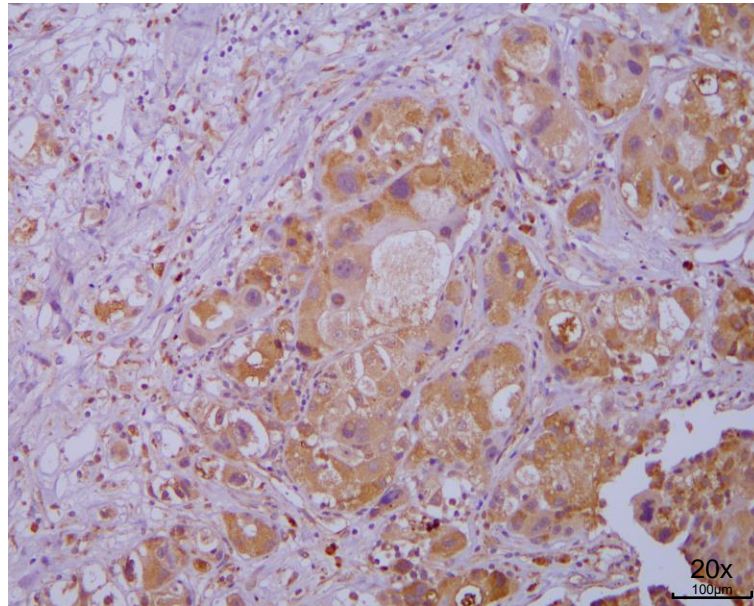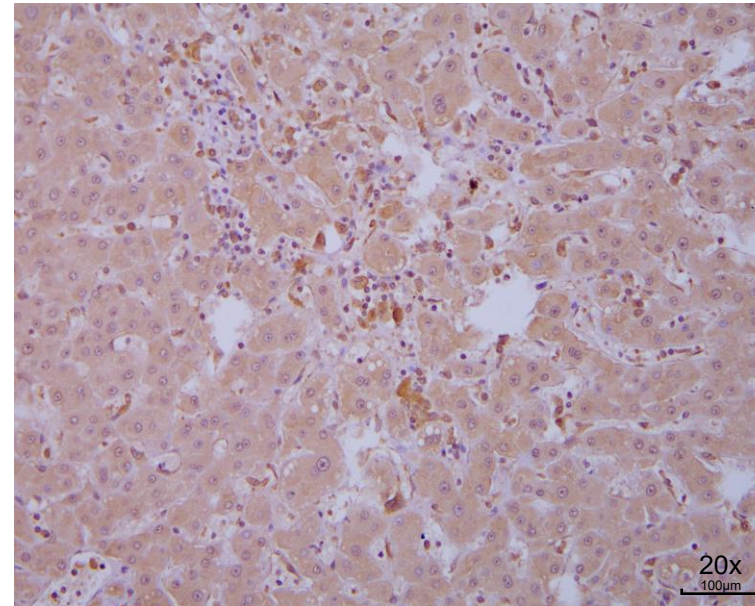



**High Ki67 expression**

Patient18

Tumor

Adjacent

**XPO1**

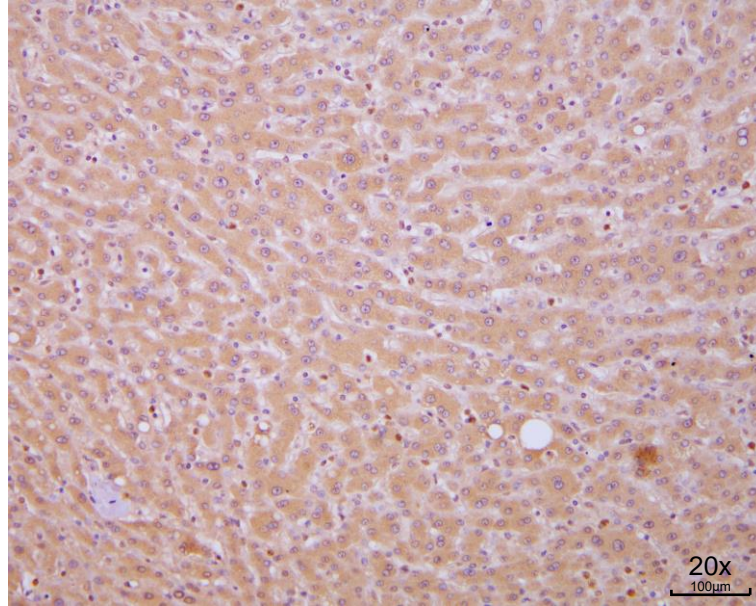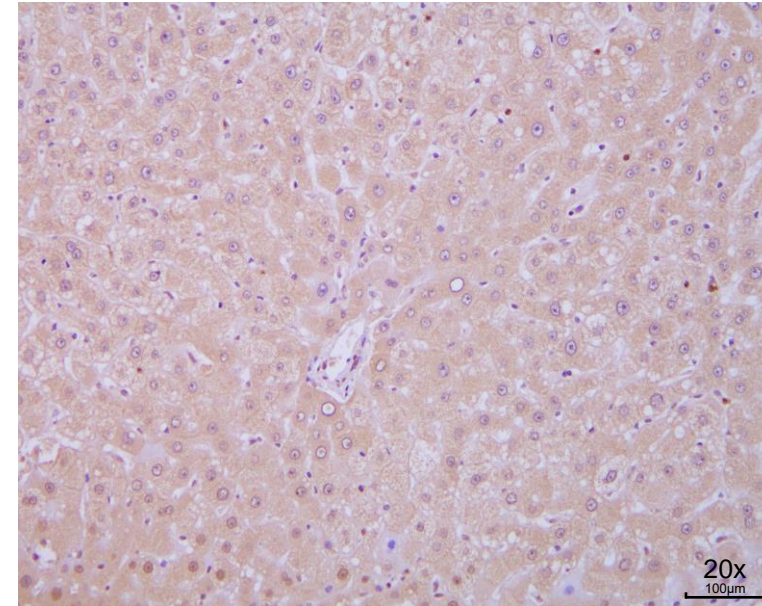

**RCN2**

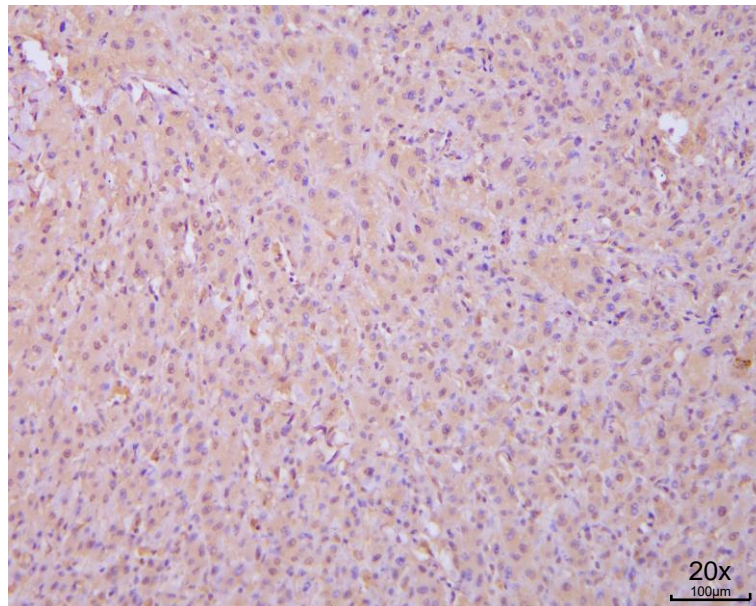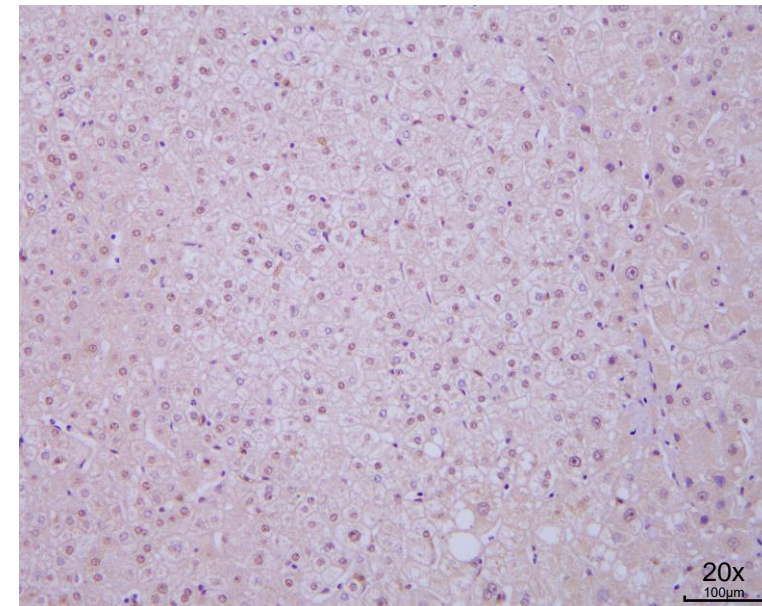



# High Ki67 expression

Patient 19

Tumor

Adjacent

XPO1

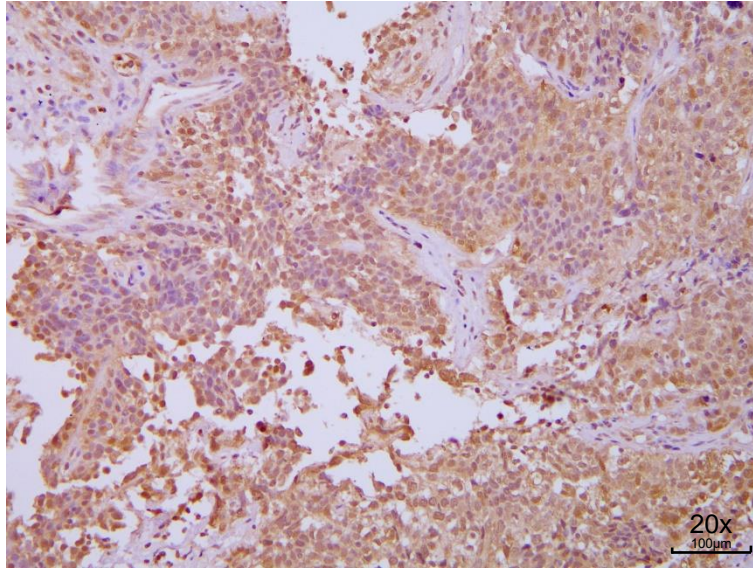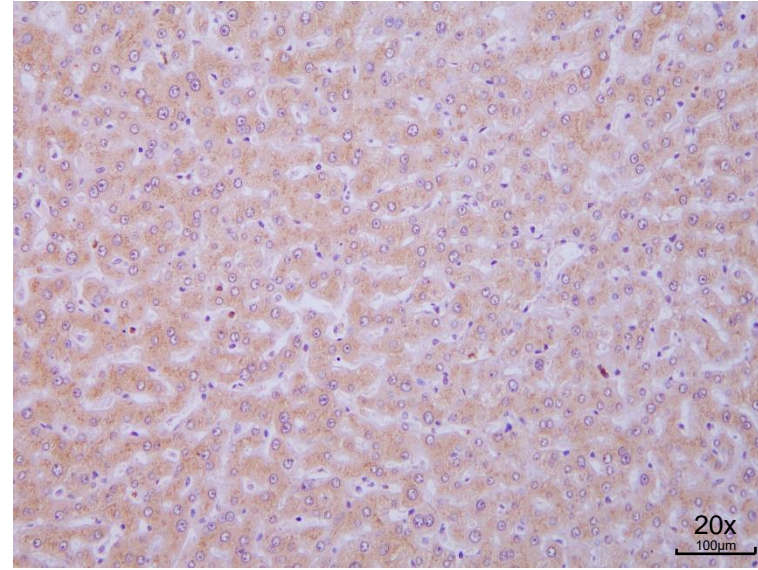

RCN2

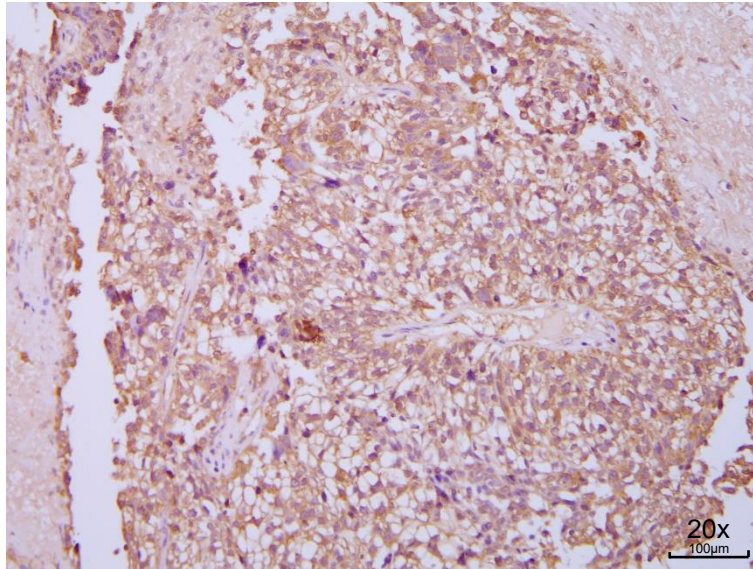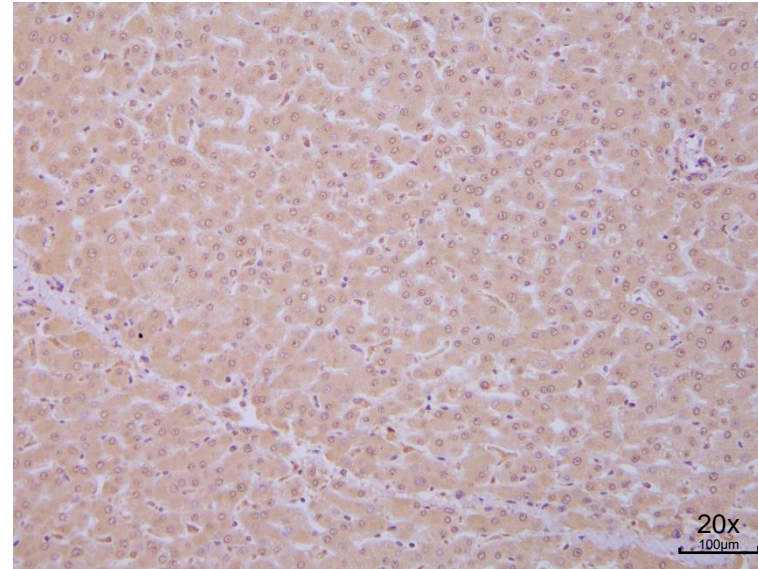



# High Ki67 expression

Patient 20

Tumor

Adjacent

XPO1

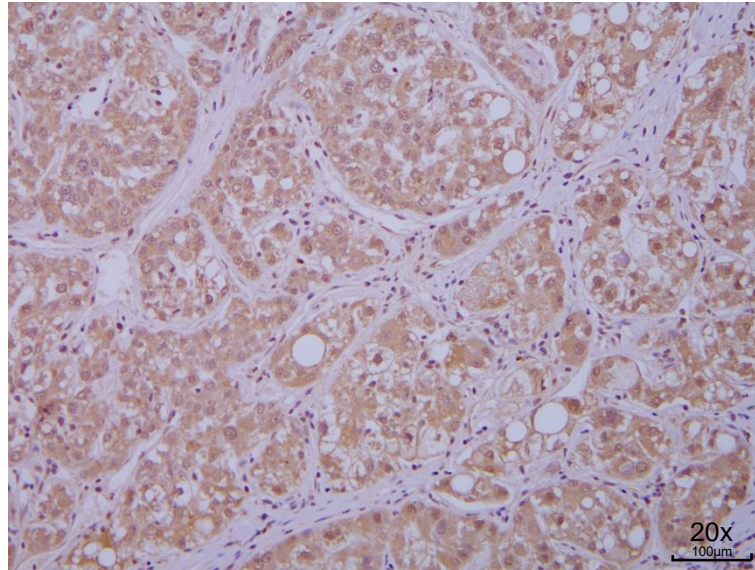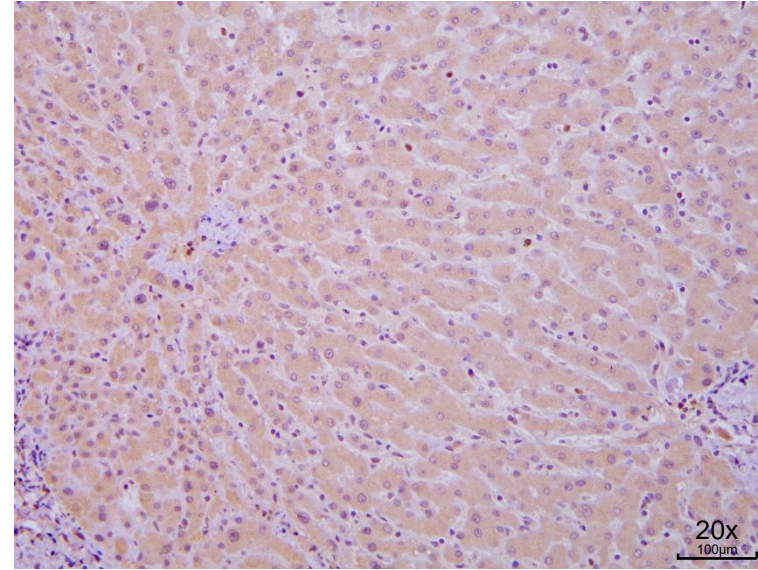

RCN2

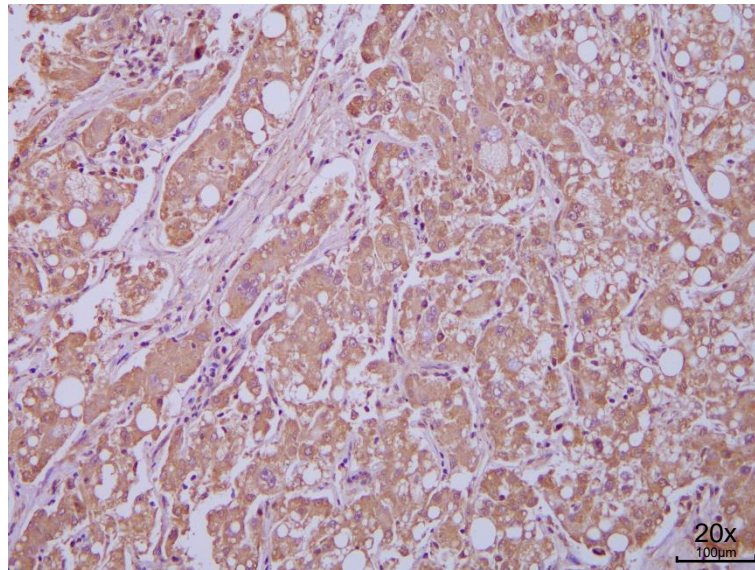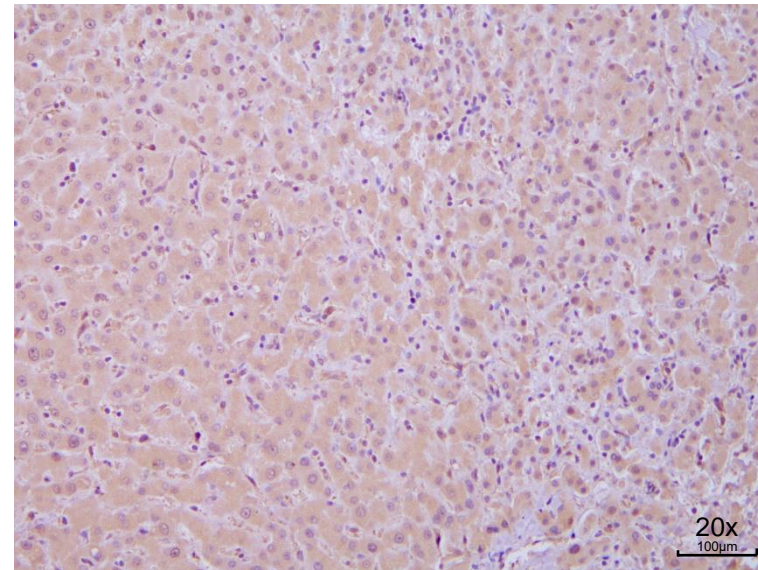



# High Ki67 expression

Patient 21

Tumor

Adjacent

XPO1

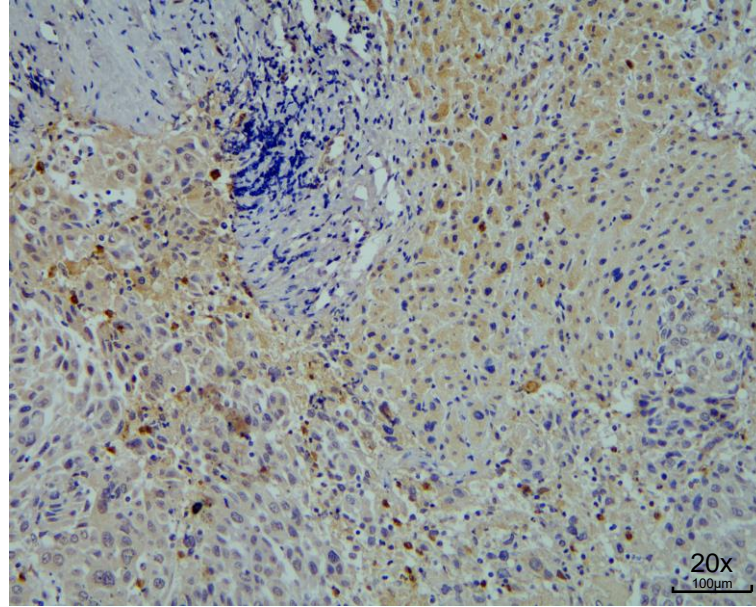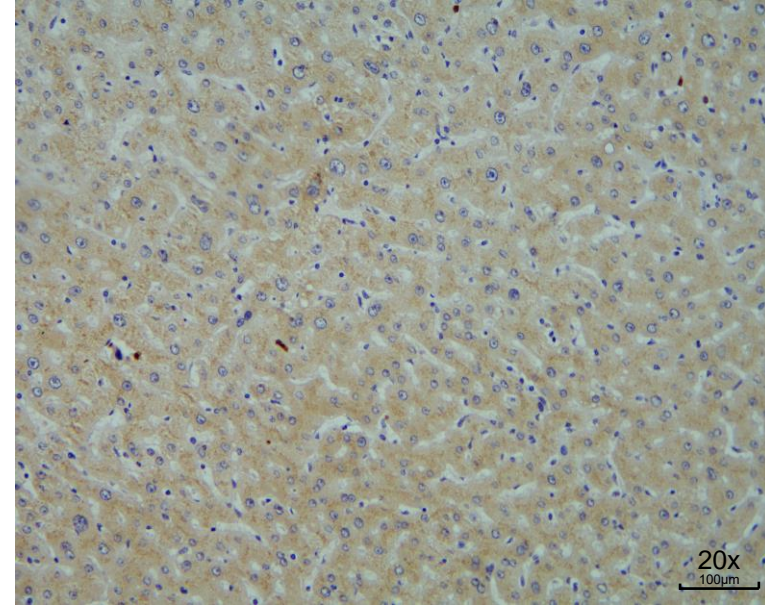

RCN2

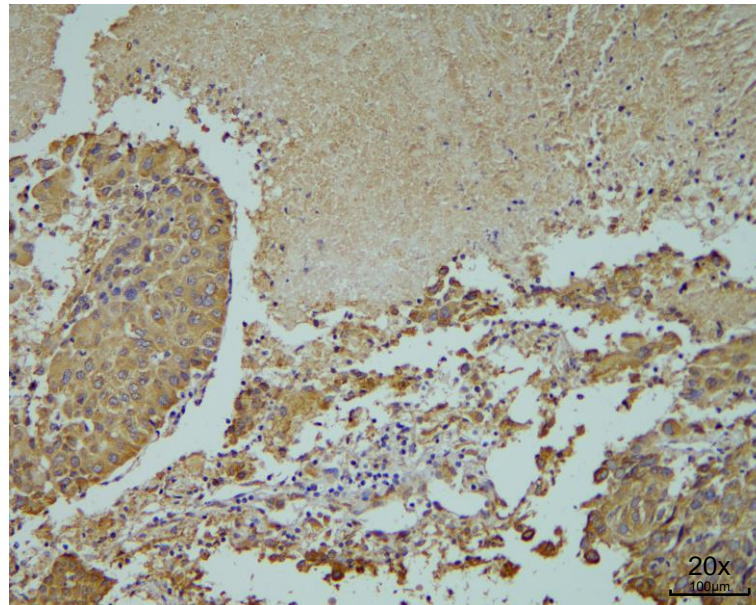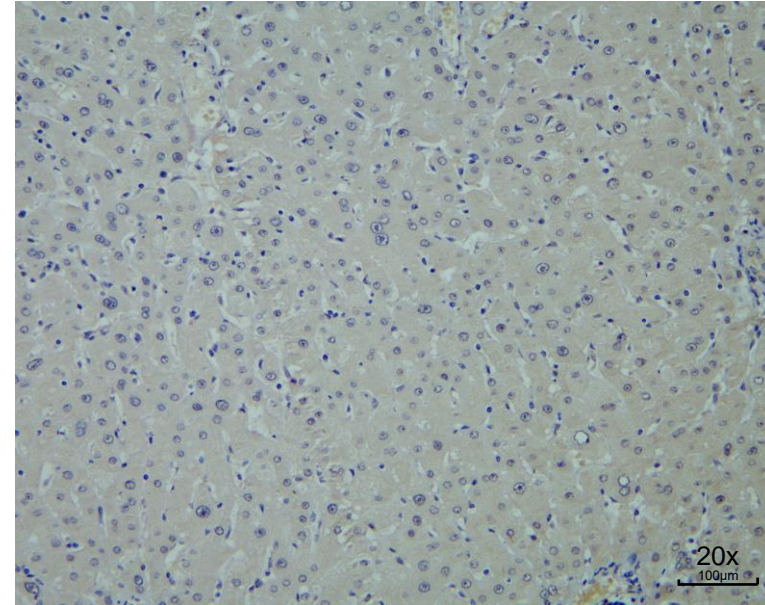



# High Ki67 expression

Patient 22

Tumor

Adjacent

XPO1

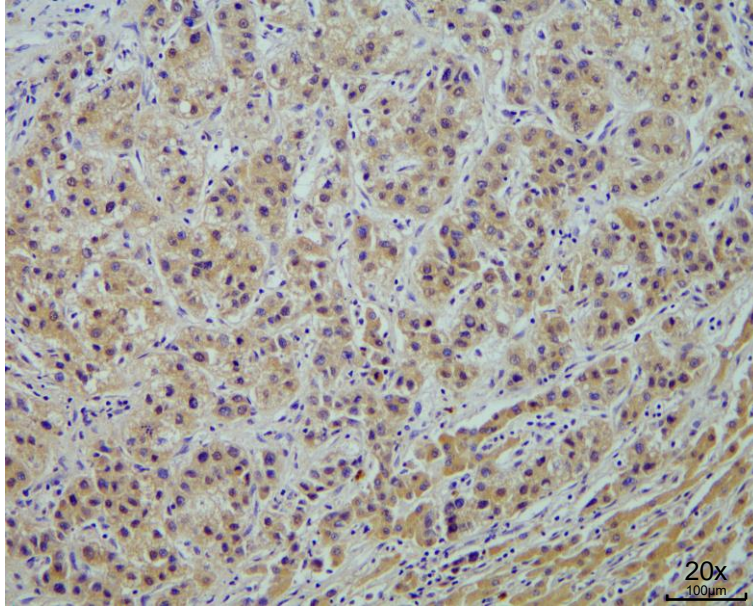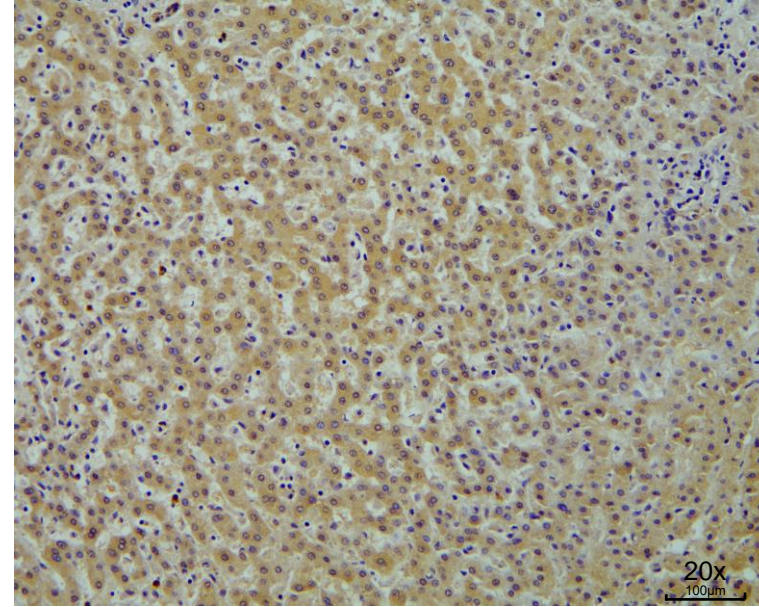

RCN2

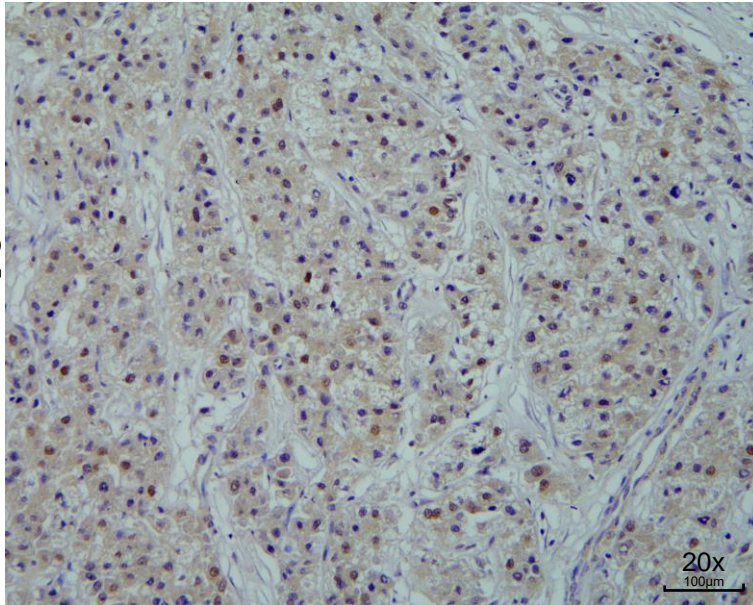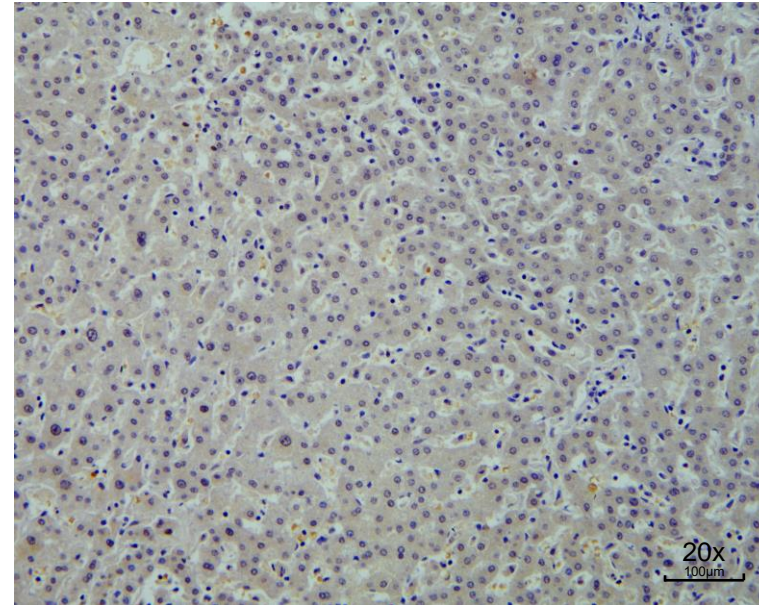



**High Ki67 expression**

Patient 23

Tumor

Adjacent

**XPO1**

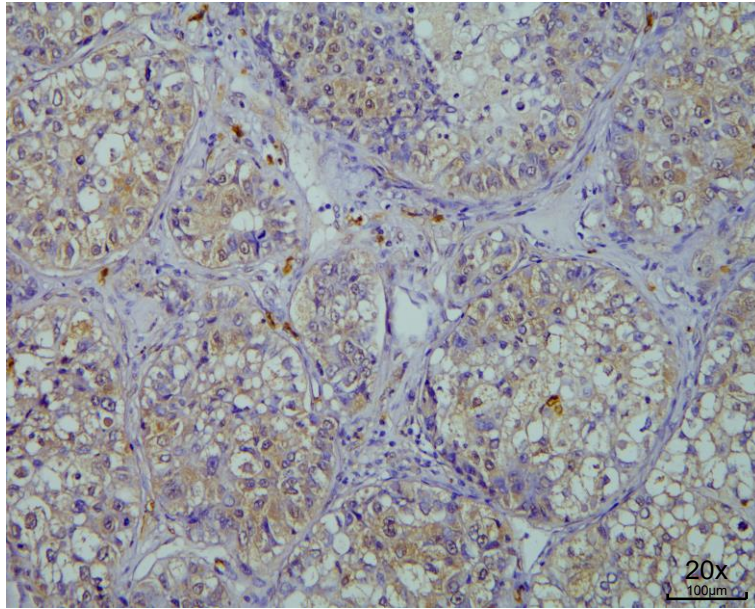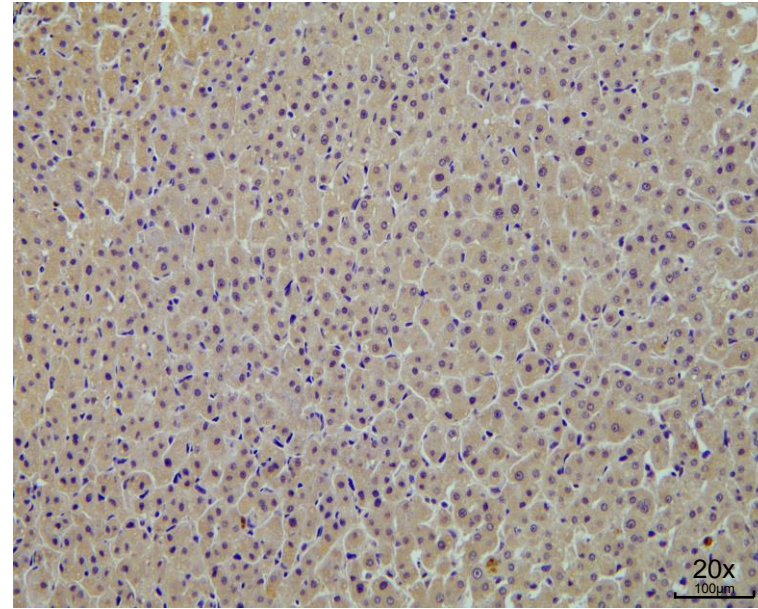

**RCN2**

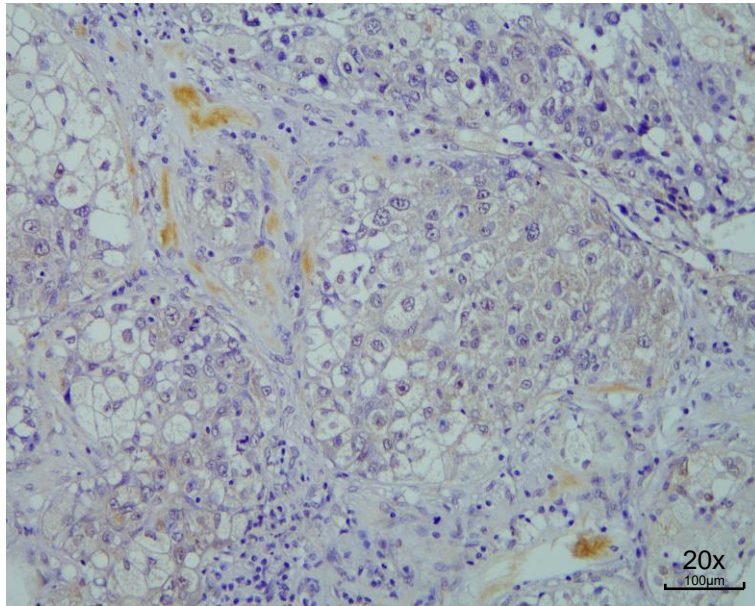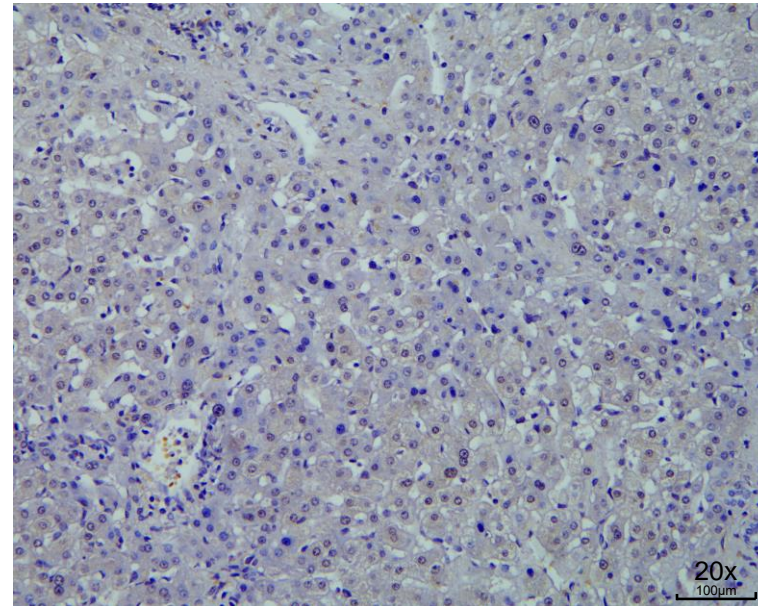



**Low Ki67 expression**

**Patient1**

**Tumor**

**Adjacent**

**XPO1**

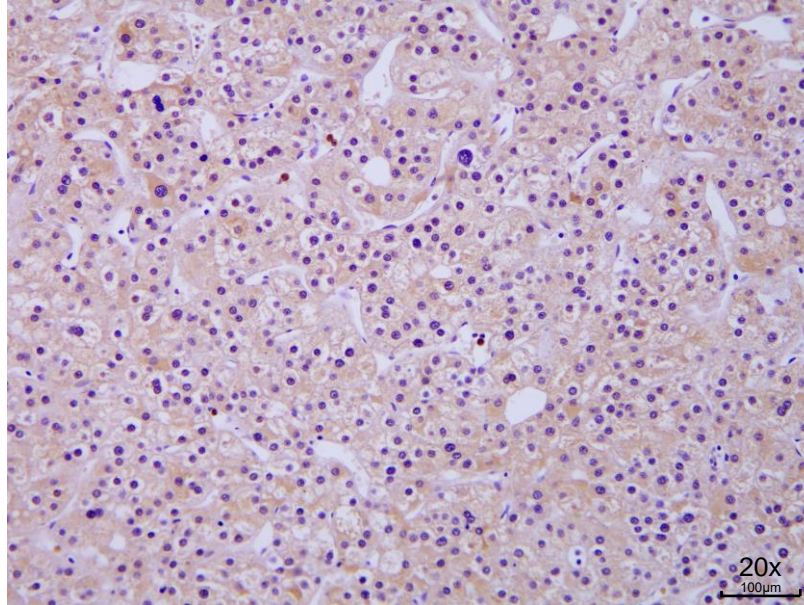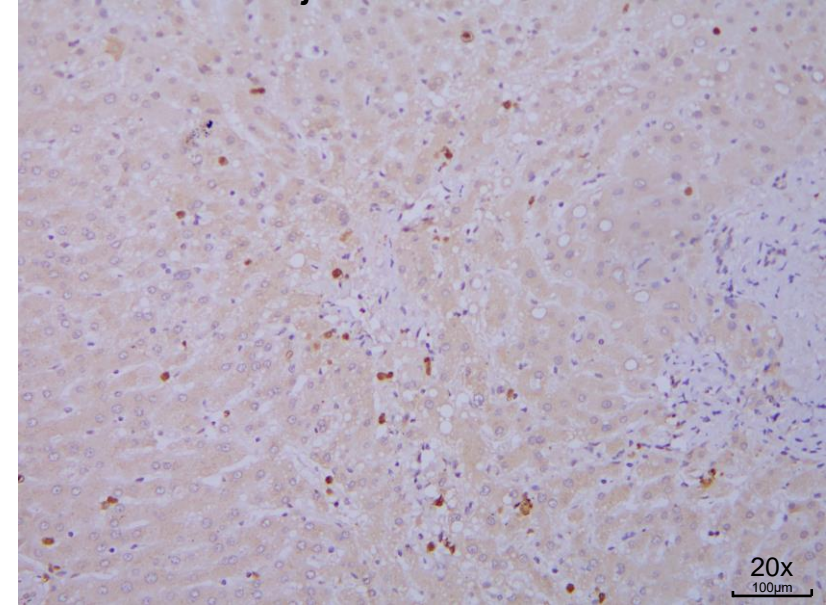

**RCN2**

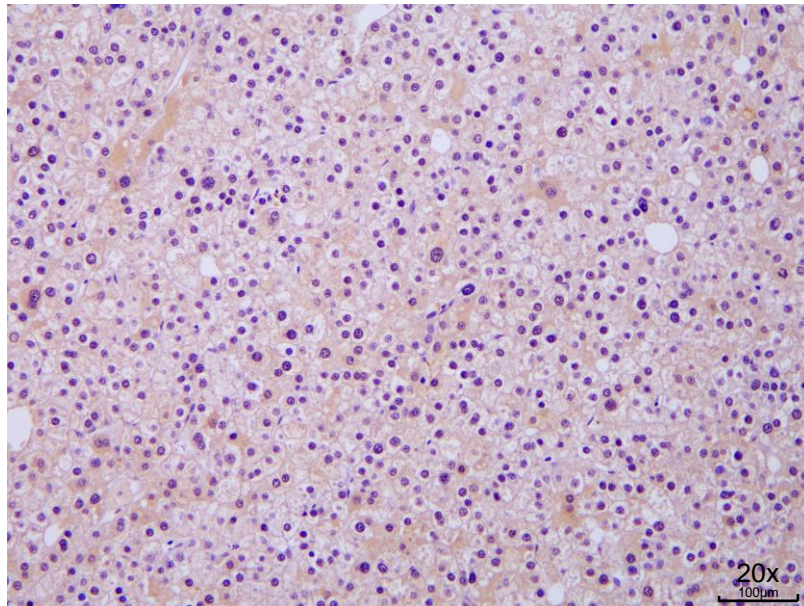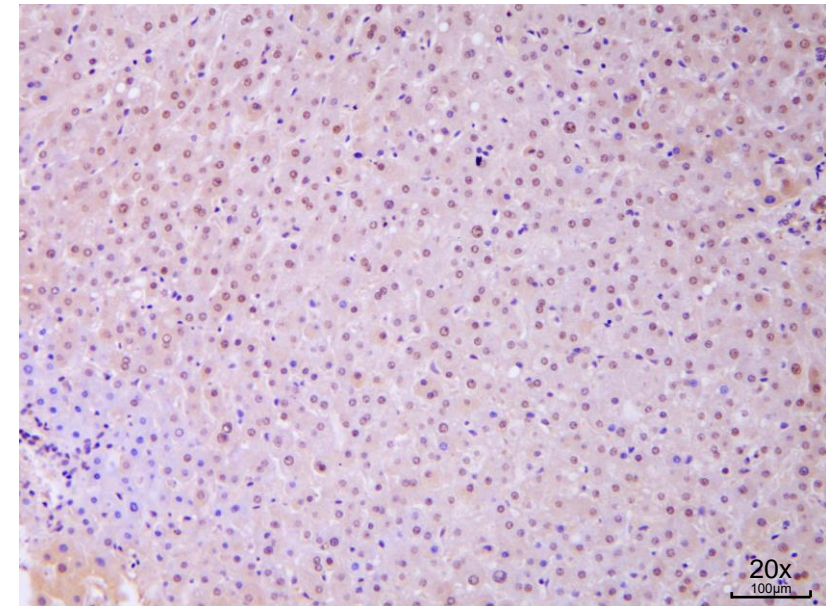



**Low Ki67 expression**

**Patient 2**

**Tumor**

**Adjacent**

**XPO1**

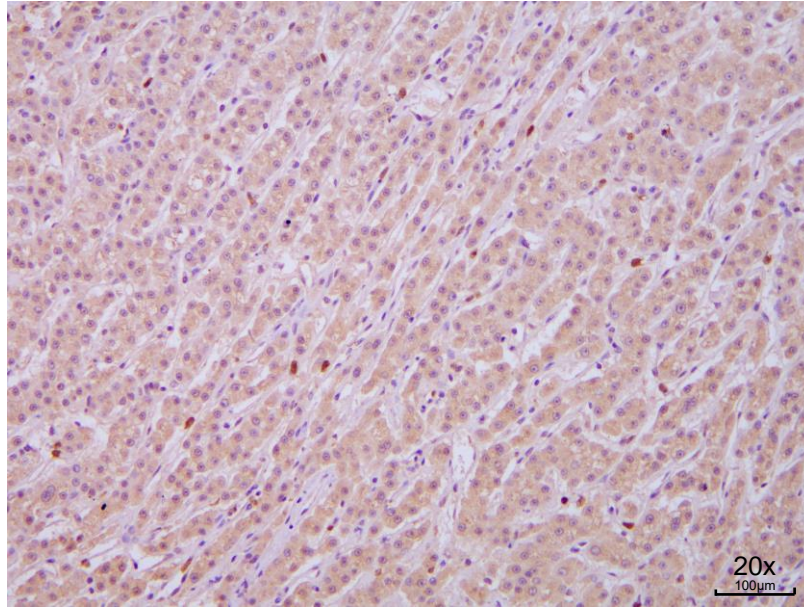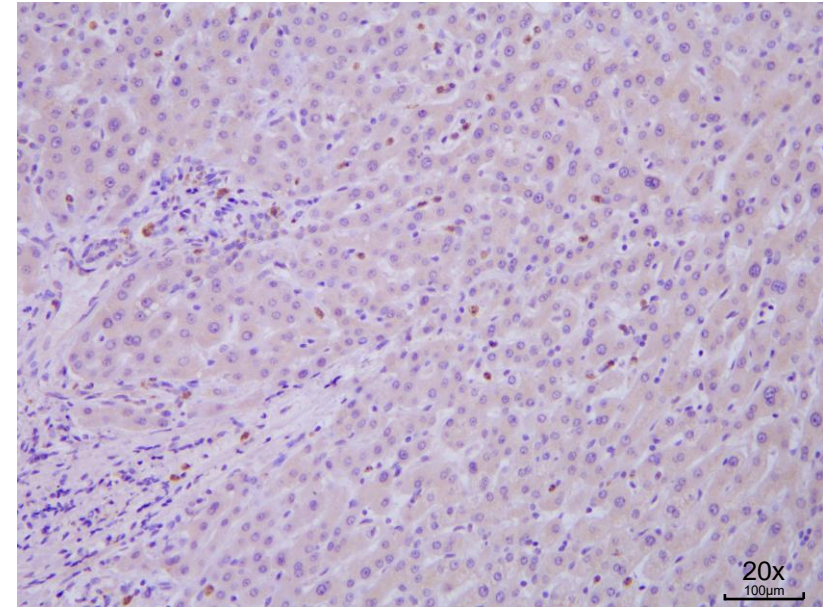

**RCN2**

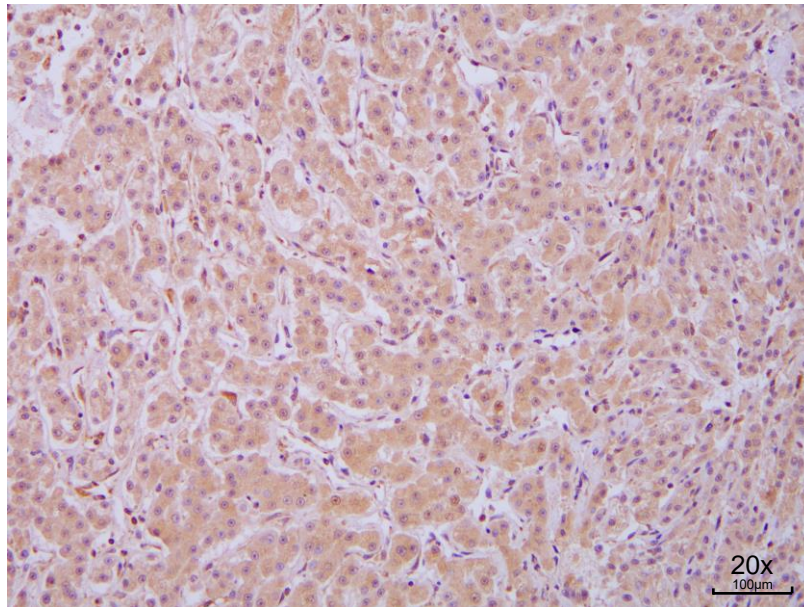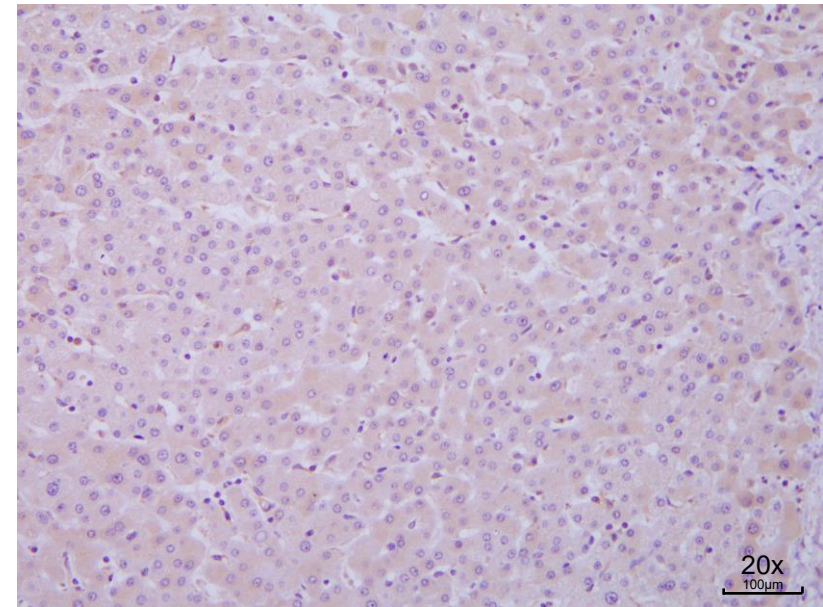



**Low Ki67 expression**

Patient3

Tumor

Adjacent

**XPO1**

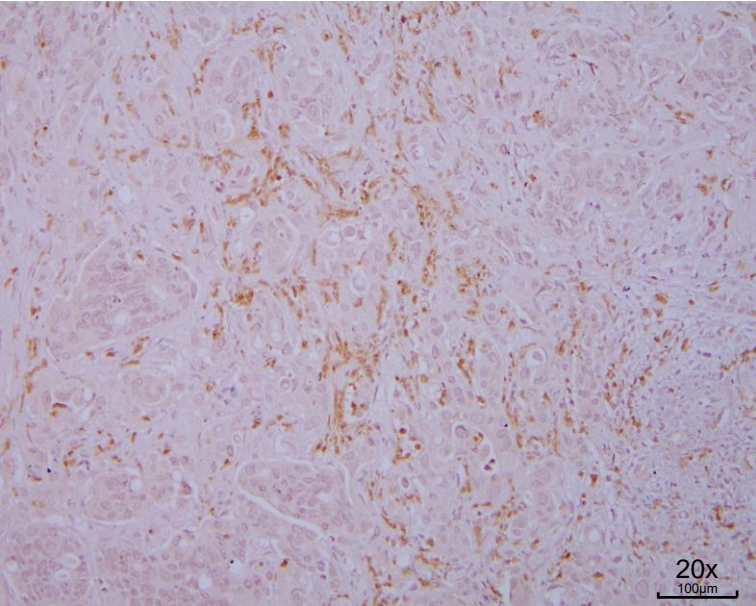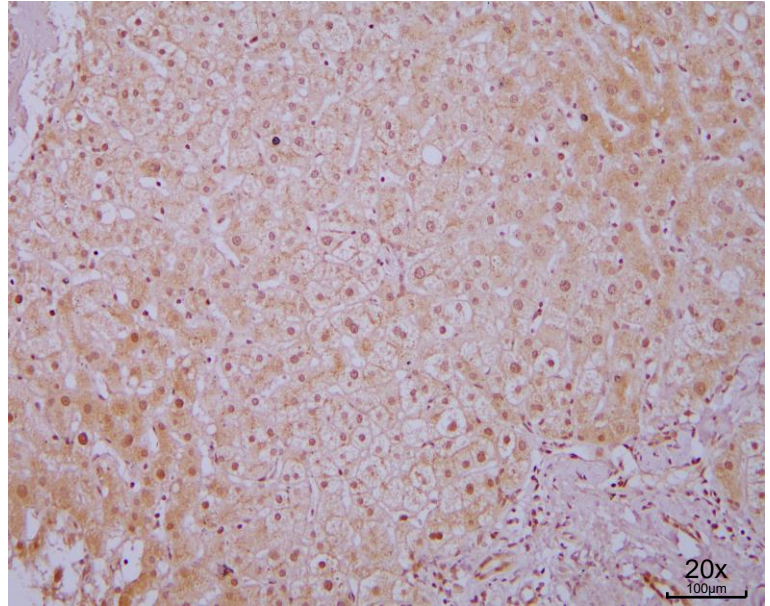

**RCN2**

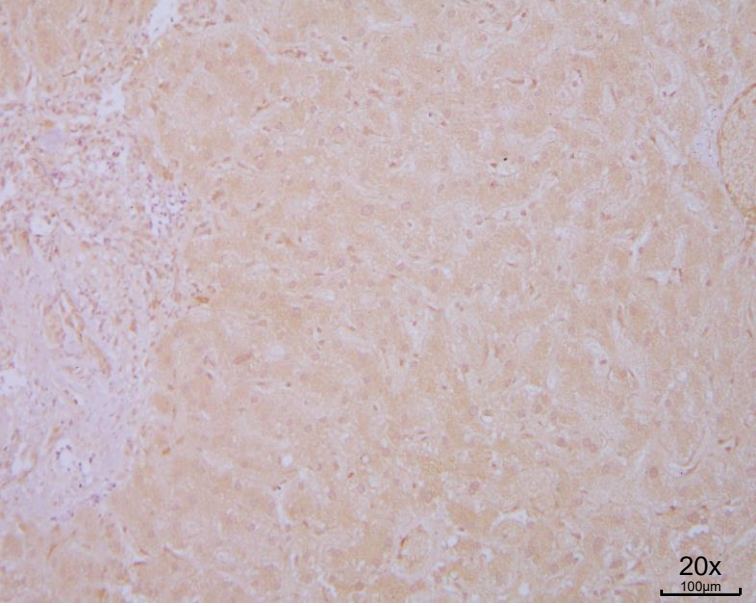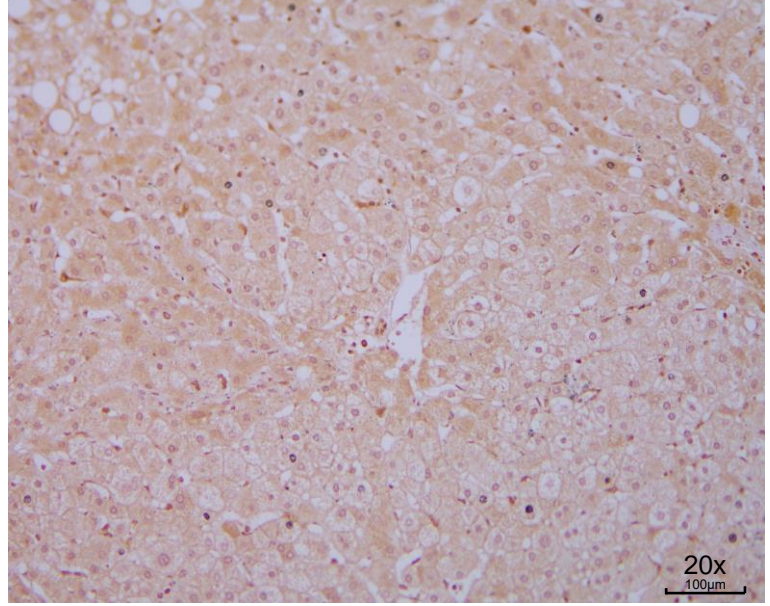



**Low Ki67 expression**

Patient 4

Tumor

Adjacent

**XPO1**

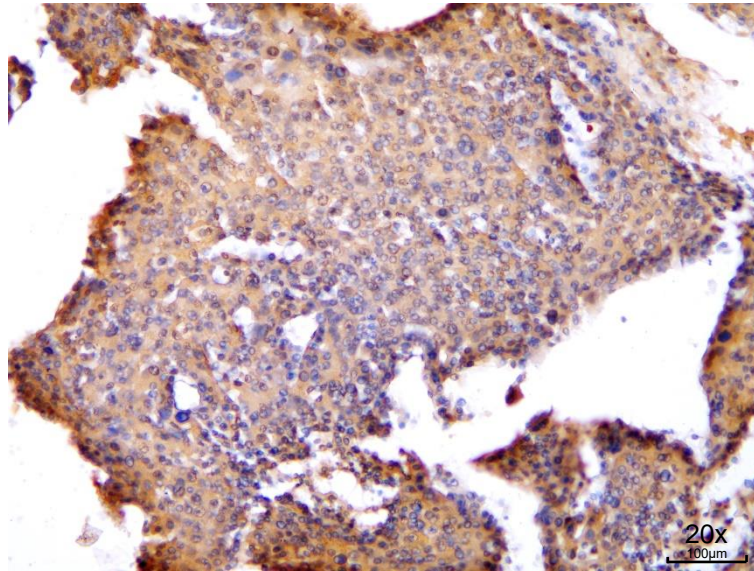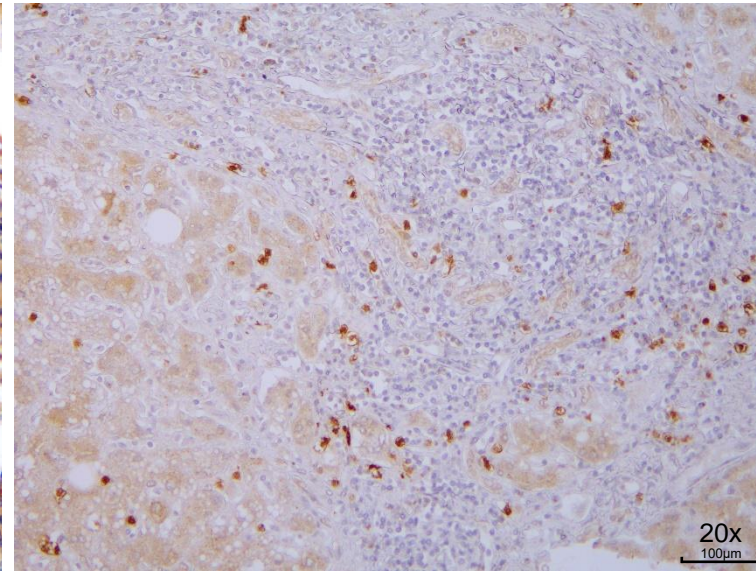

**RCN2**

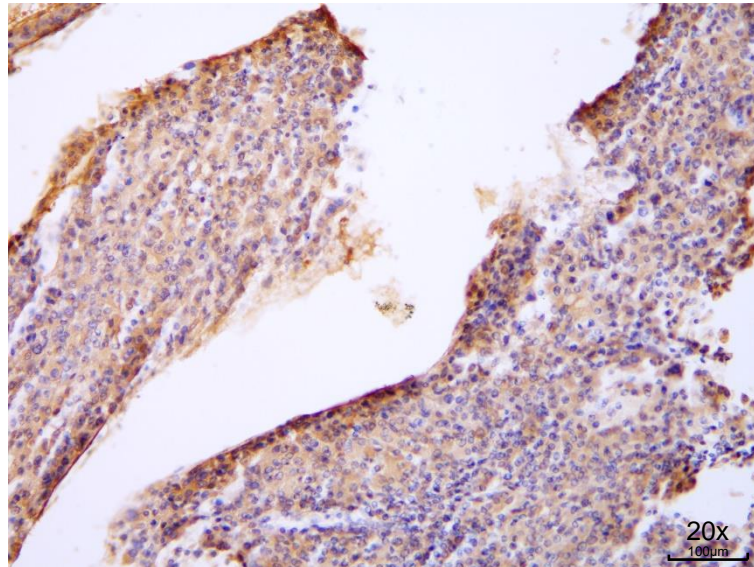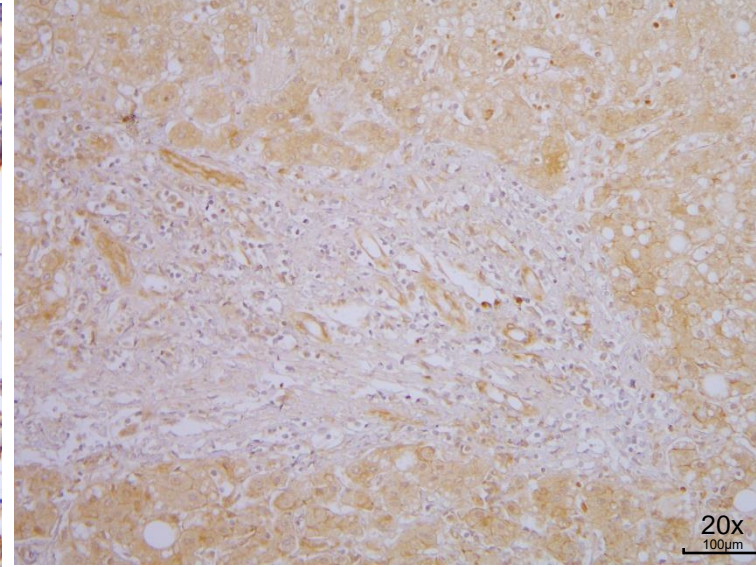



**Low Ki67 expression**

**Patient 5**

**Tumor**

**Adjacent**

**XPO1**

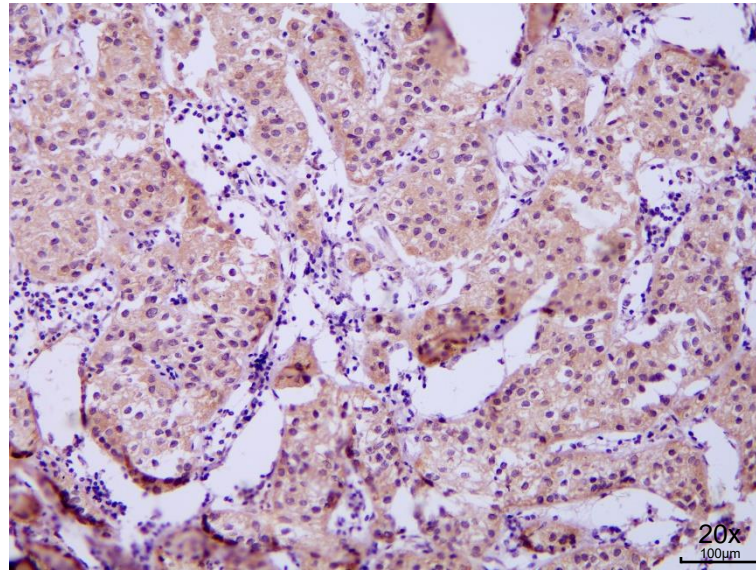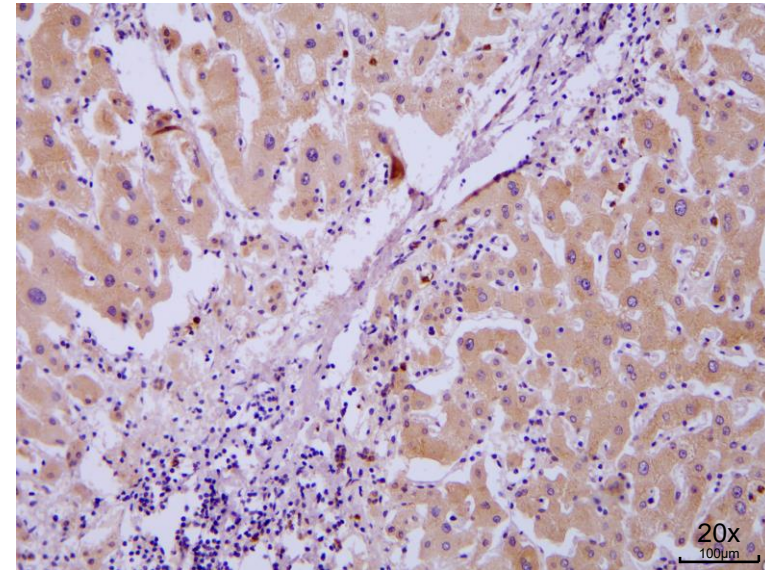

**RCN2**

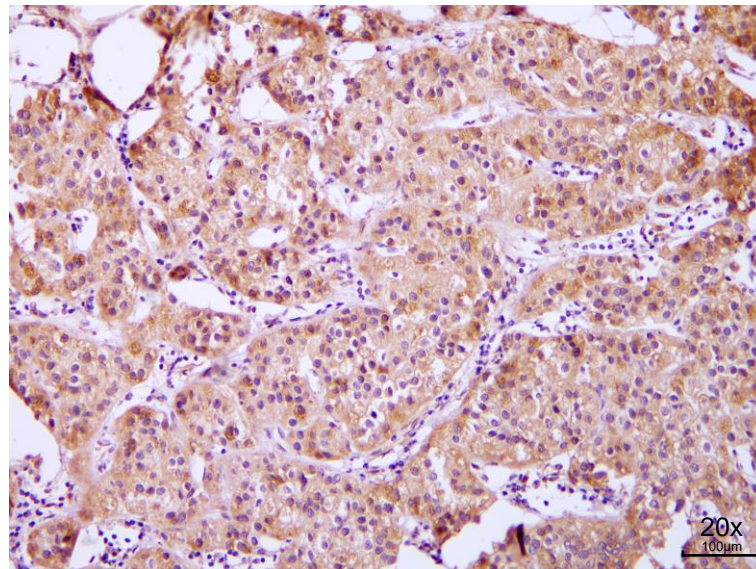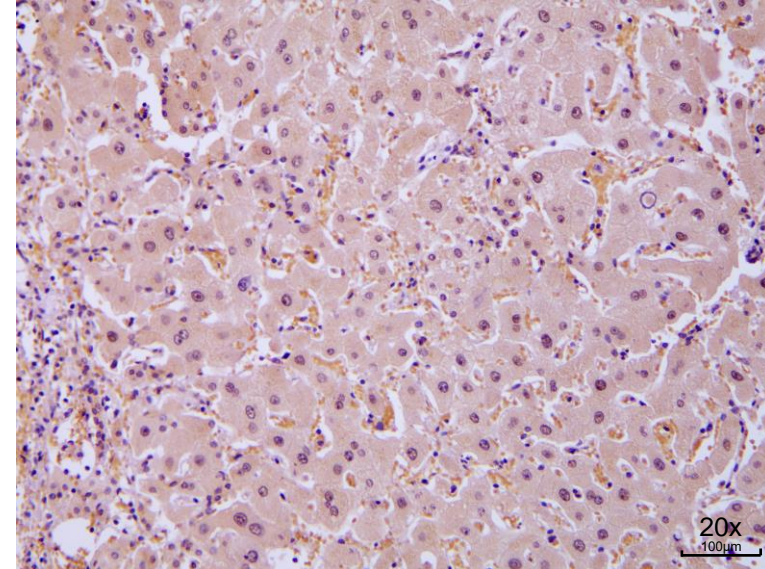



**Low Ki67 expression**

Patient 6

Tumor

Adjacent

**XPO1**

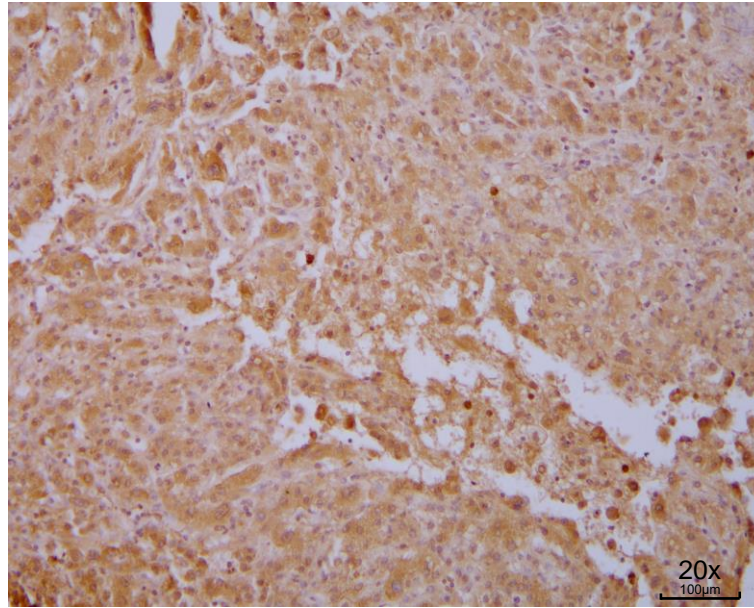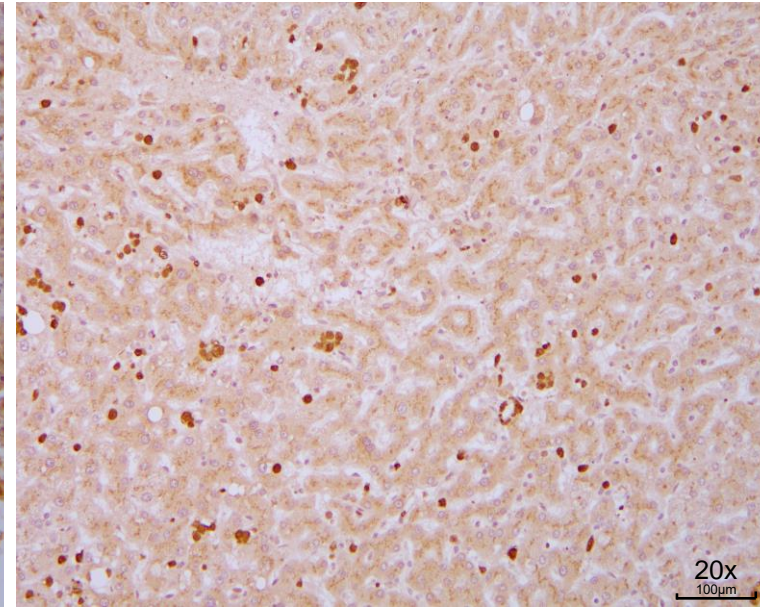

**RCN2**

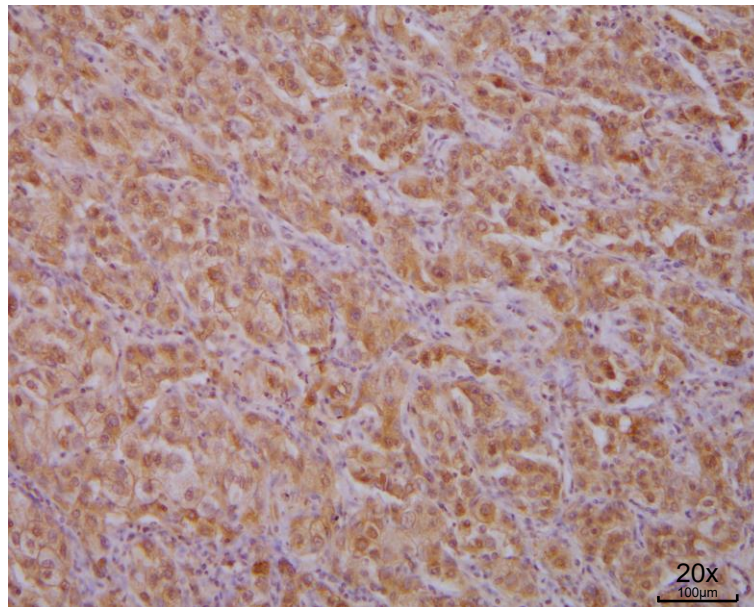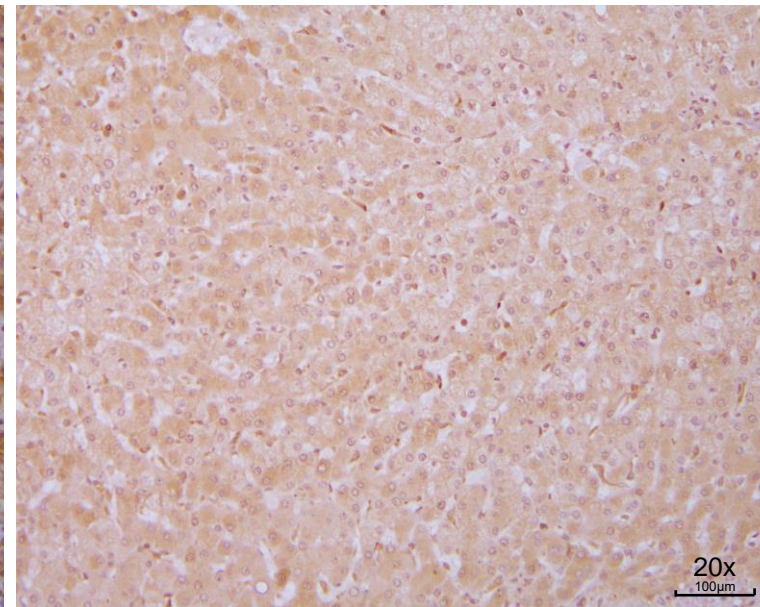



**Low Ki67 expression**

**Patient 7**

**Tumor**

**Adjacent**

**XPO1**

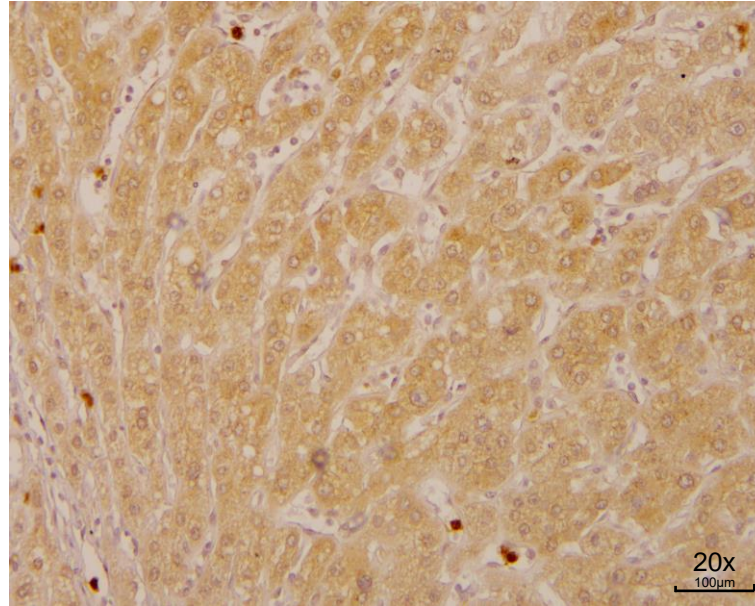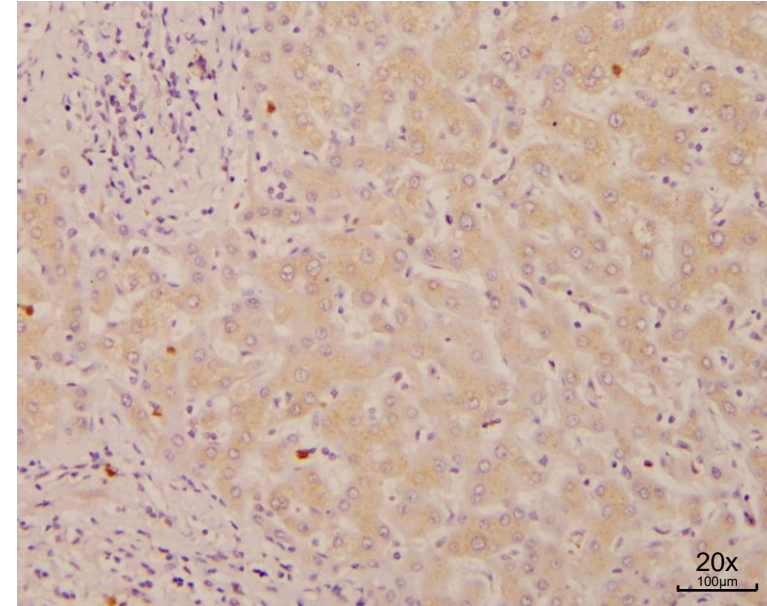

**RCN2**

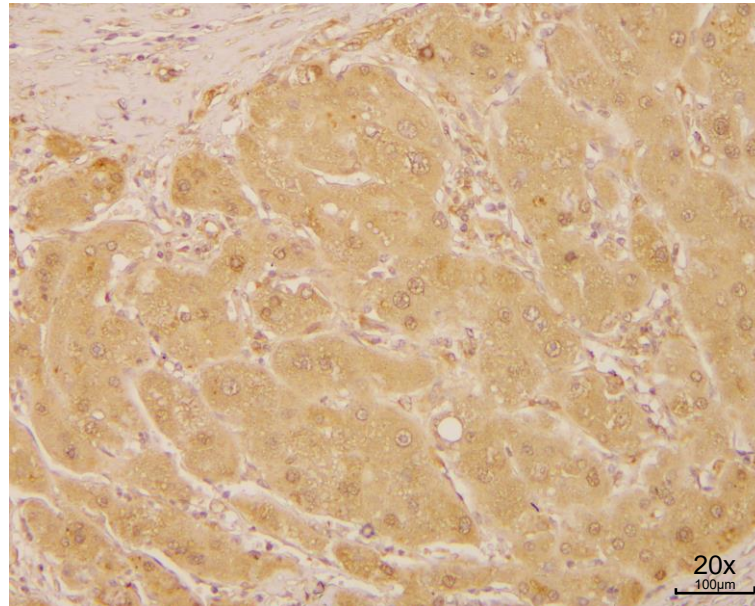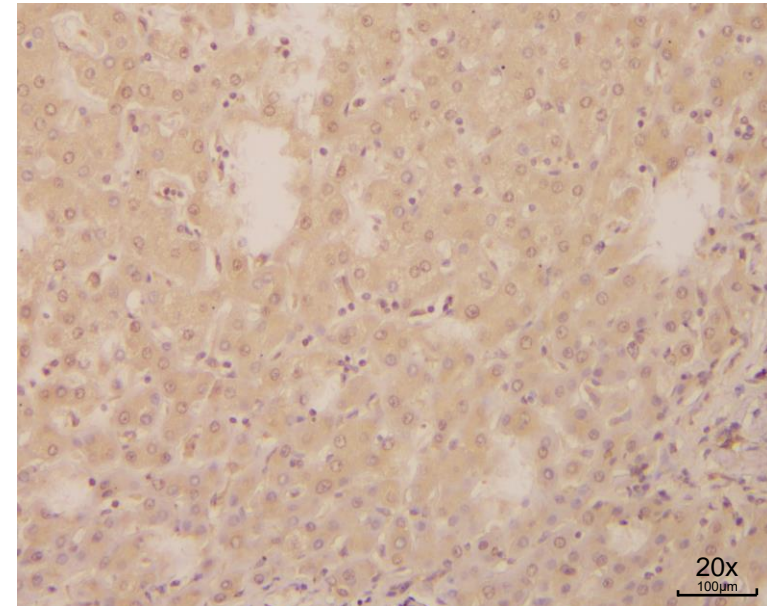



**Low Ki67 expression**

**Patient 8**

**Tumor**

**Adjacent**

**XPO1**

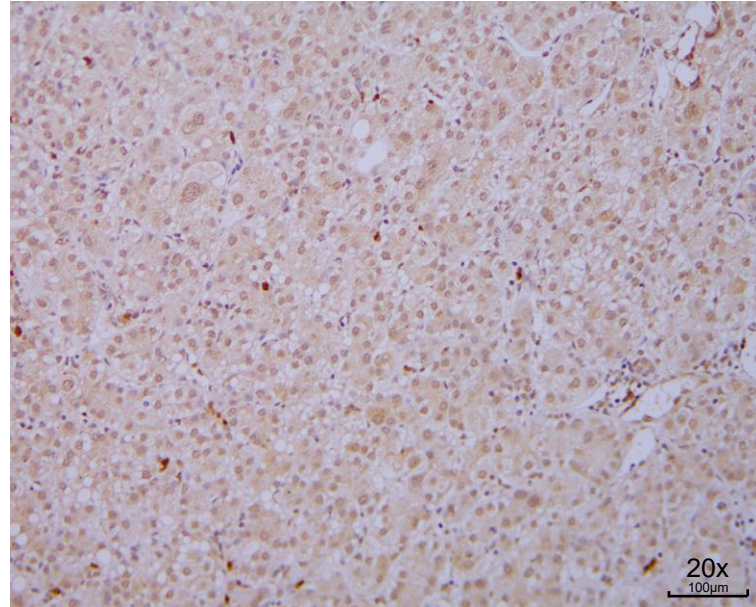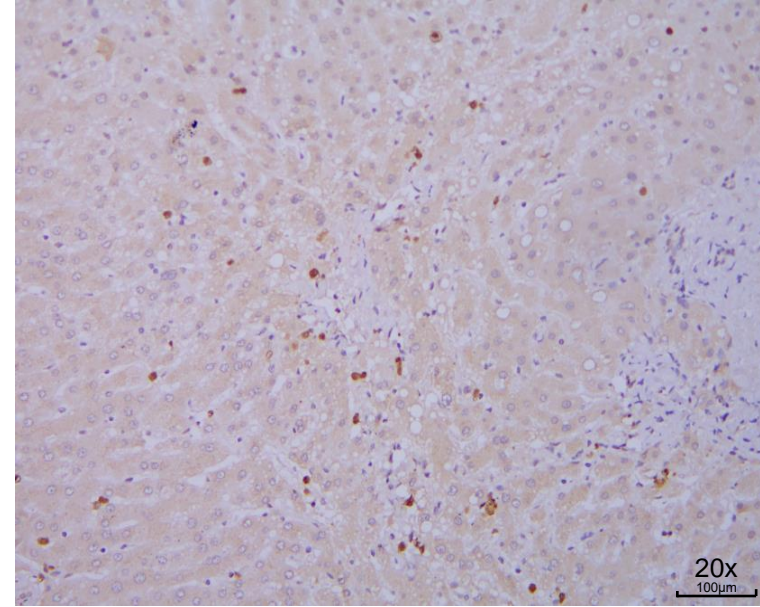

**RCN2**

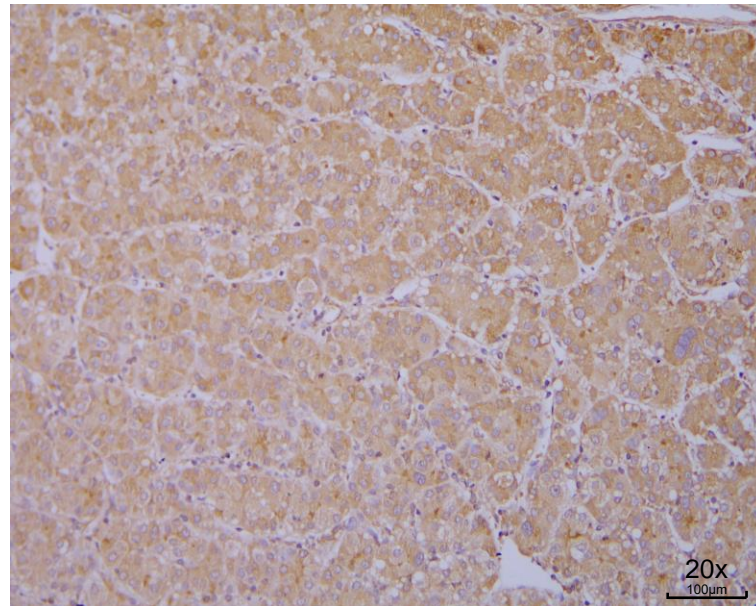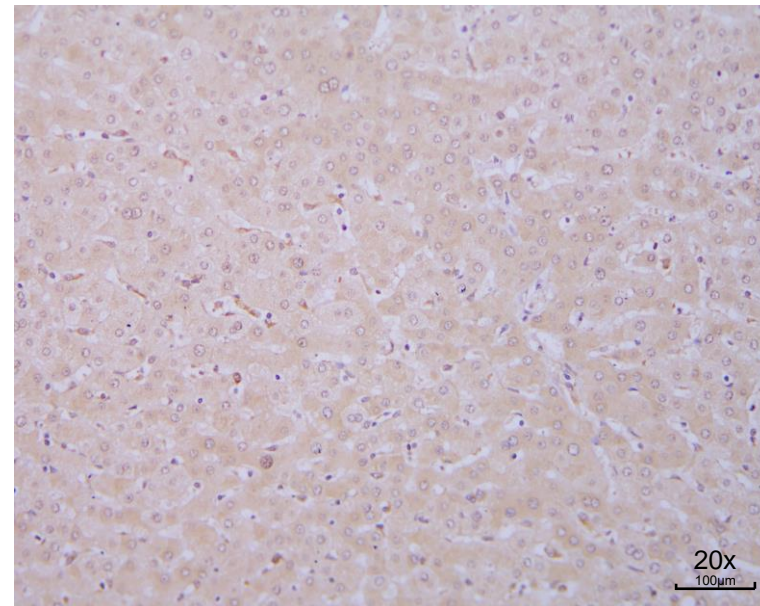



**Low Ki67 expression**

**Patient 9**

**Tumor**

**Adjacent**

**XPO1**

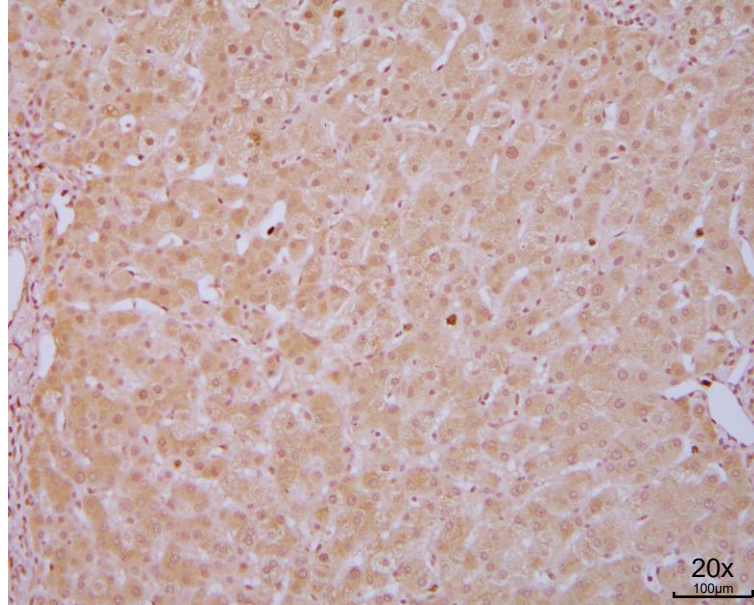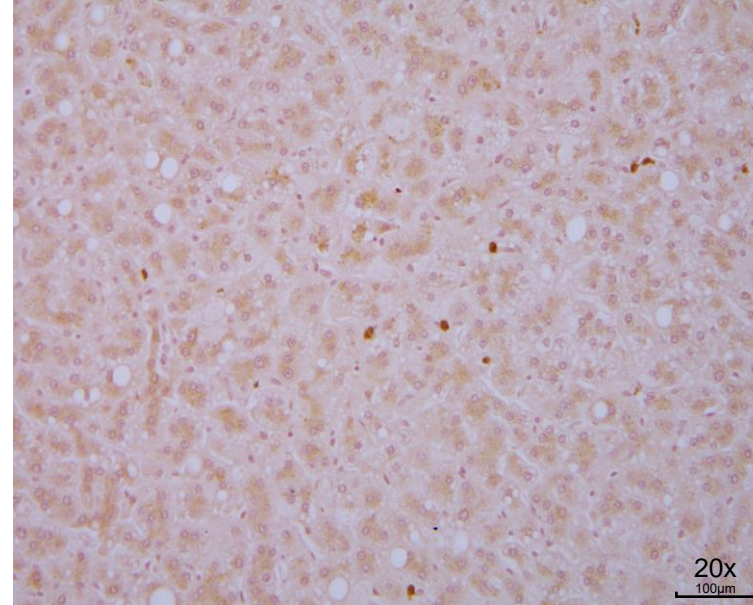

**RCN2**

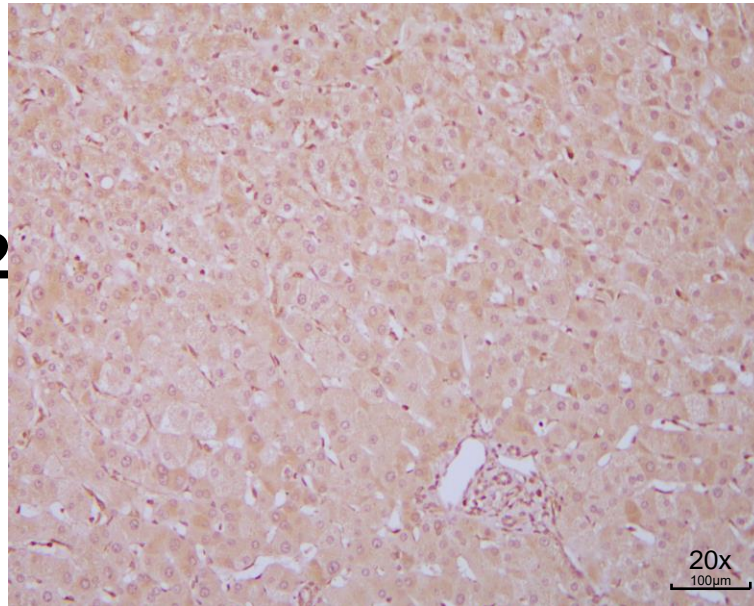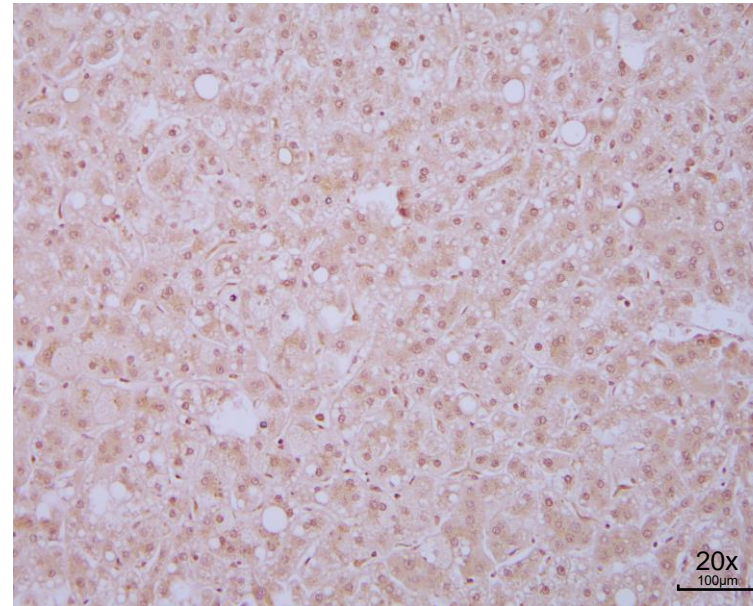



**Low Ki67 expression**

Patient 10

Tumor

Adjacent

**XPO1**

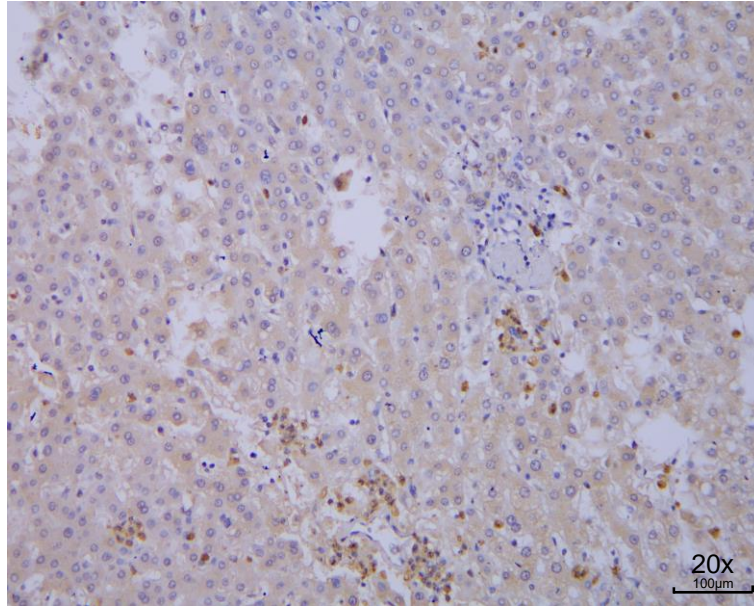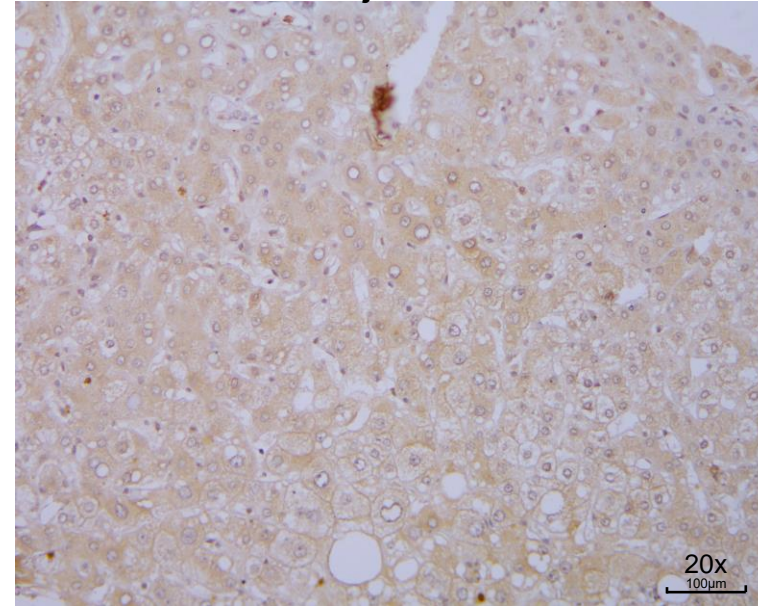

**RCN2**

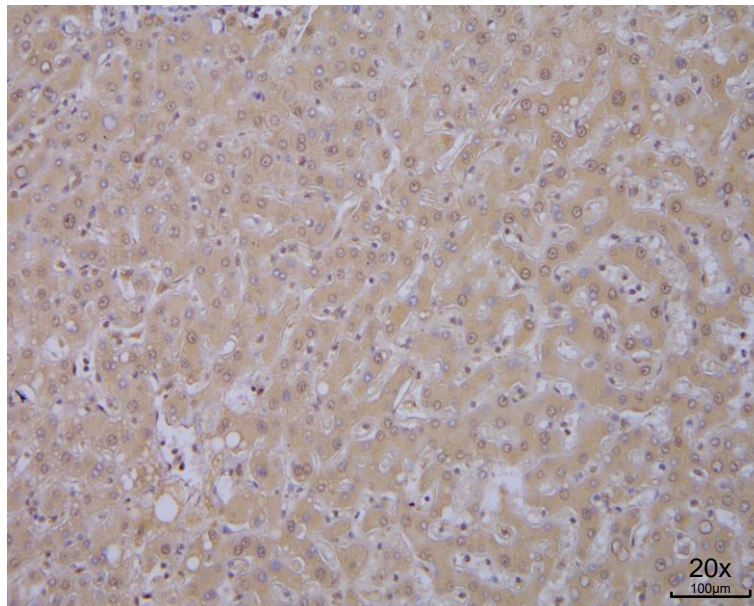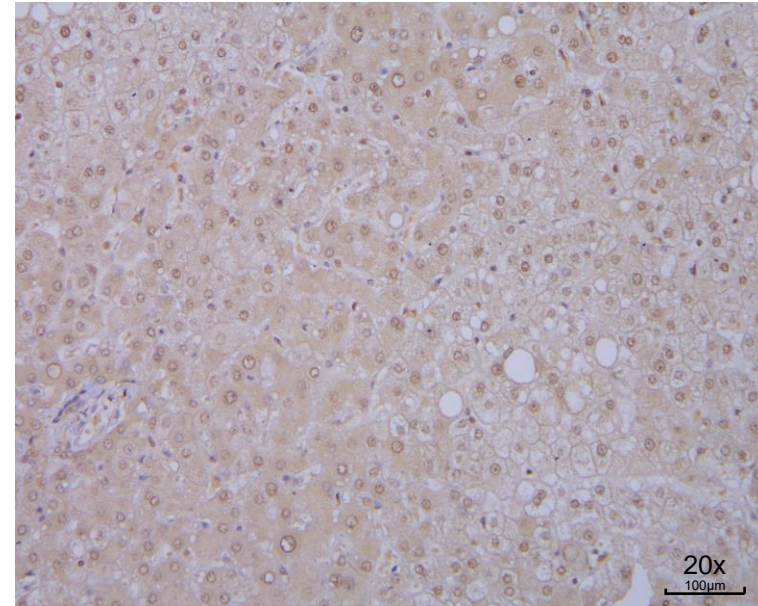



**Low Ki67 expression**

**Patient 11**

**Tumor**

**Adjacent**

**XPO1**

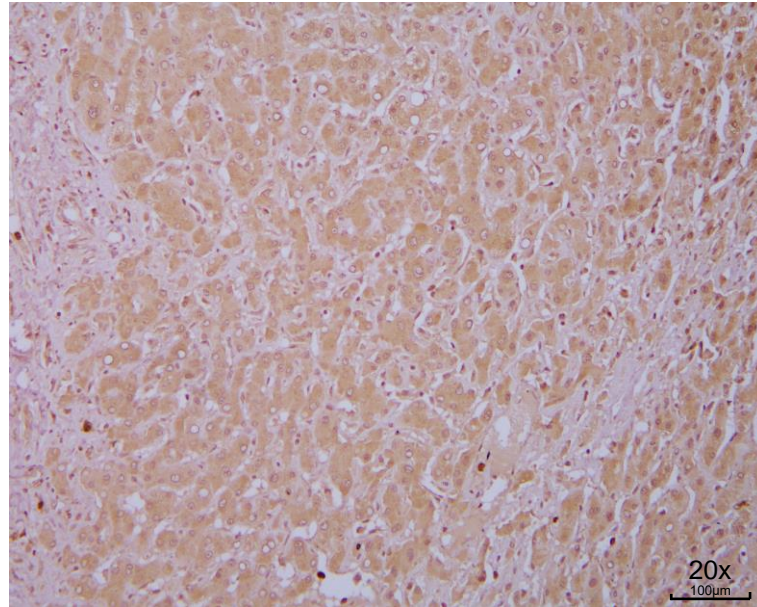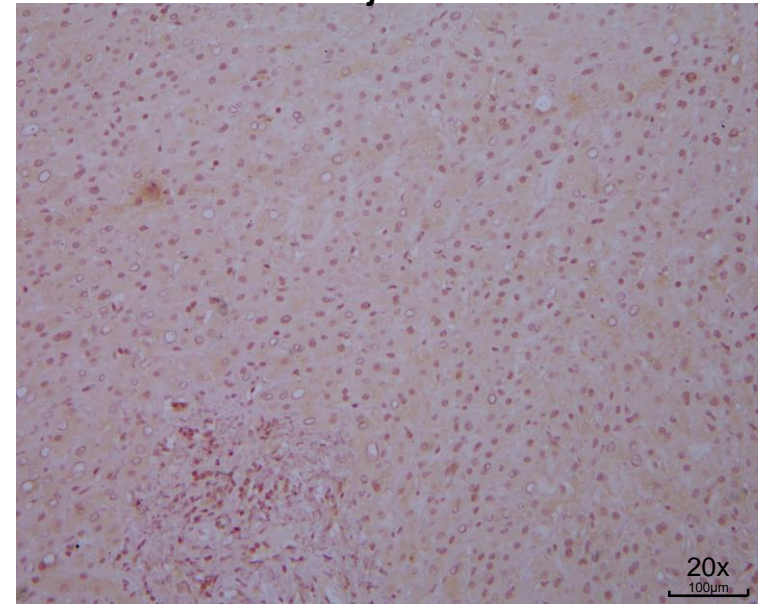

**RCN2**

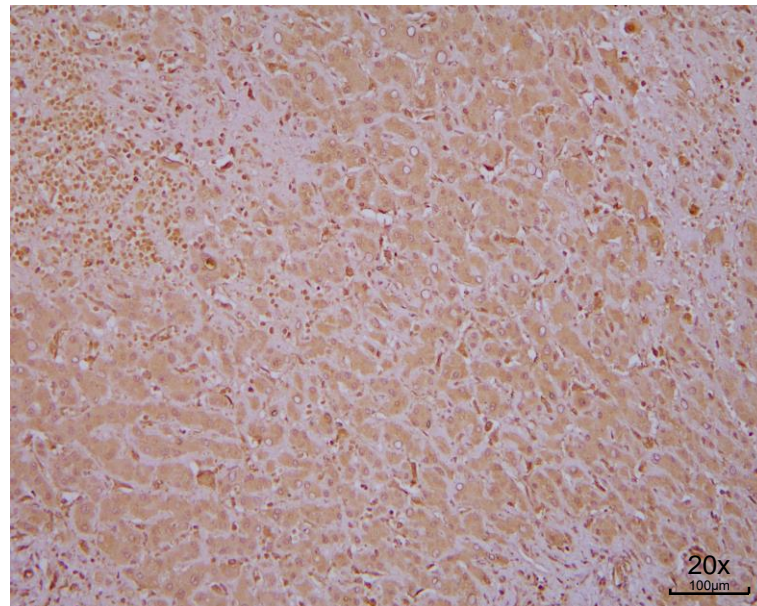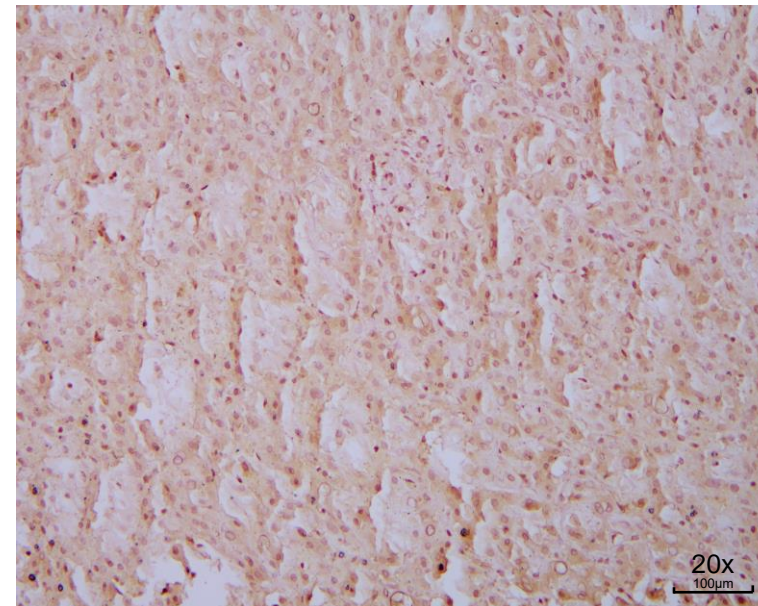



**Low Ki67 expression**  
**Patient 12**

**Tumor**

**Adjacent**

**XPO1**

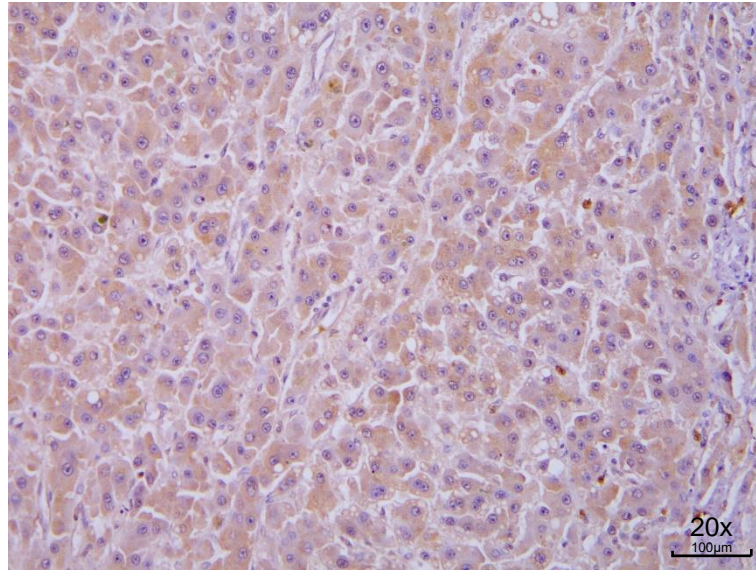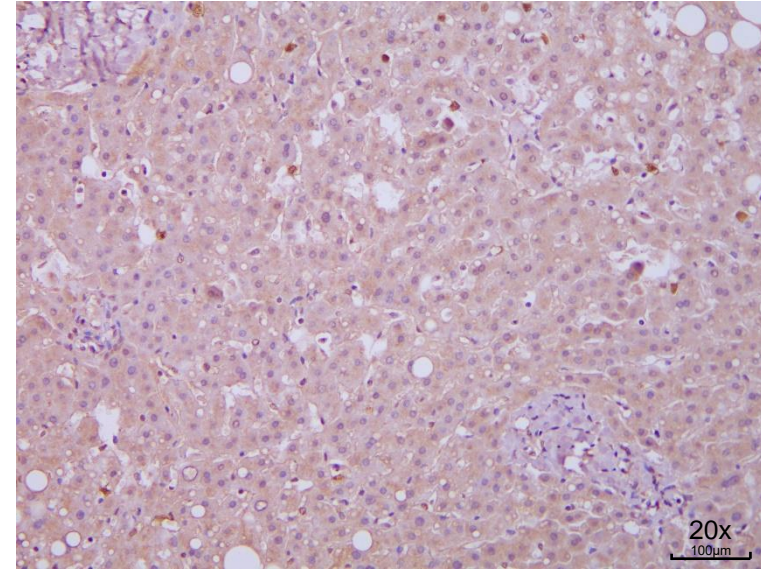

**RCN2**

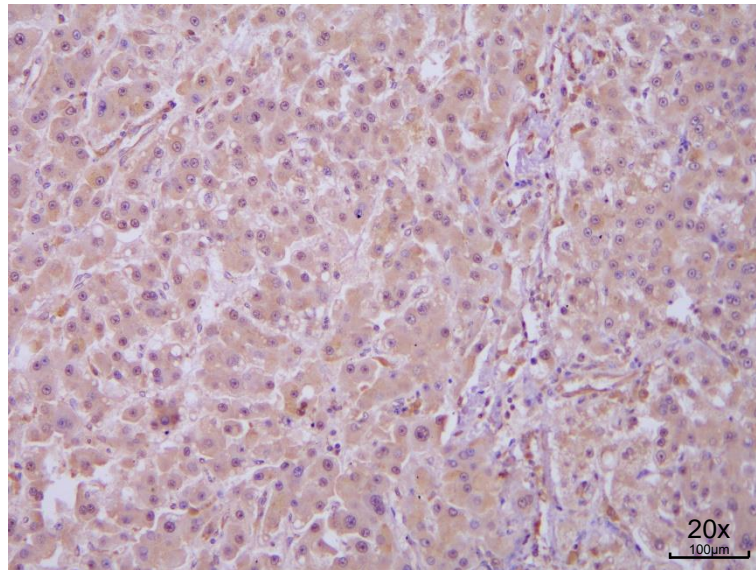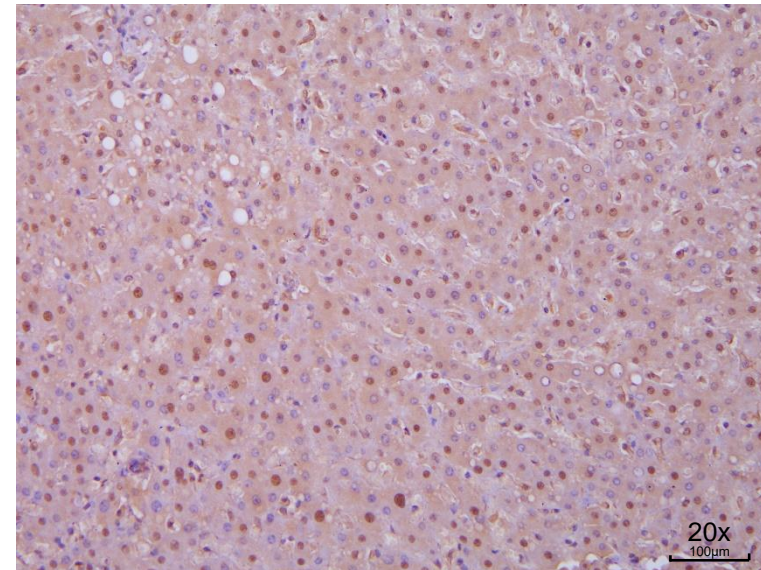



**Low Ki67 expression**

**Patient 13**

**Tumor**

**Adjacent**

**XPO1**

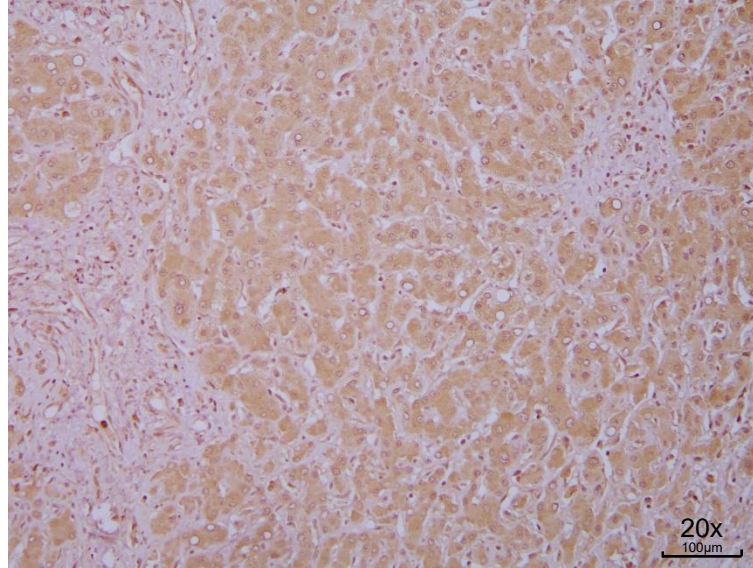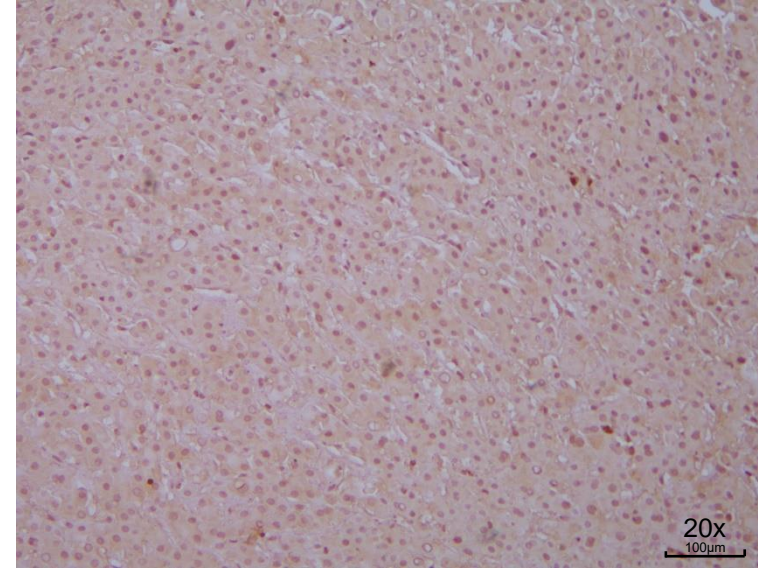

**RCN2**

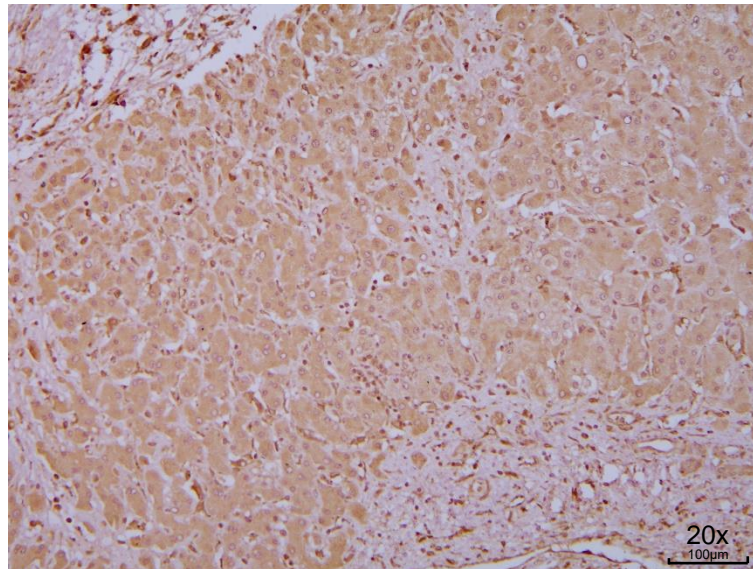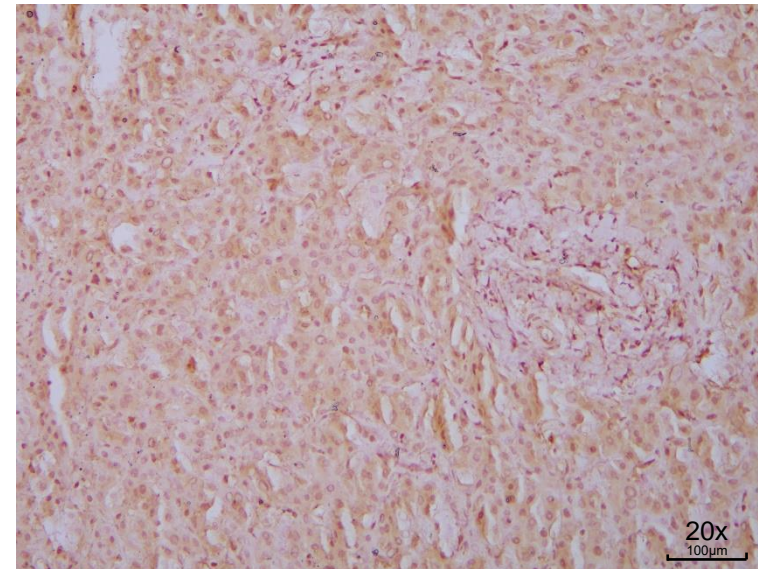



**Low Ki67 expression**

Patient 14

Tumor

Adjacent

**XPO1**

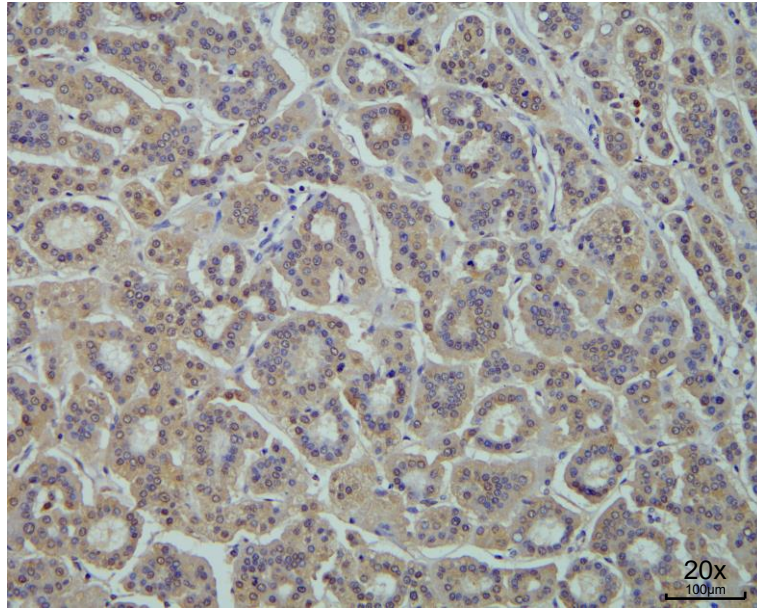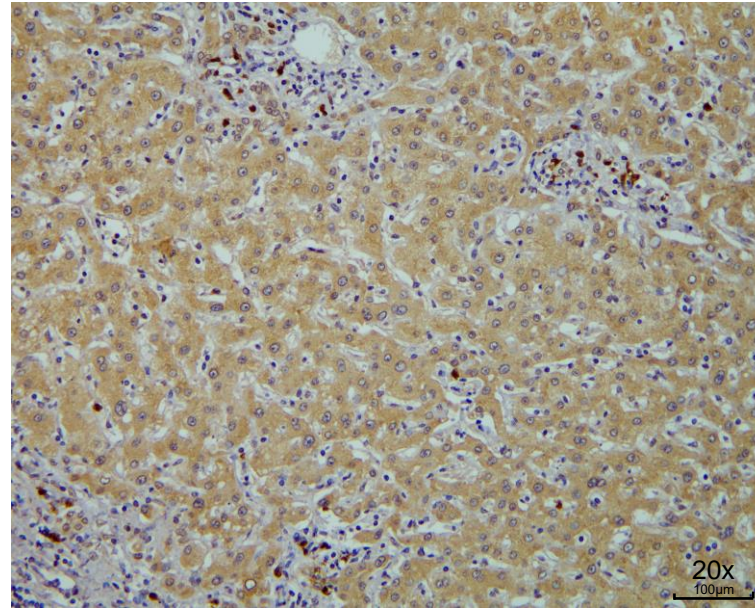

**RCN2**

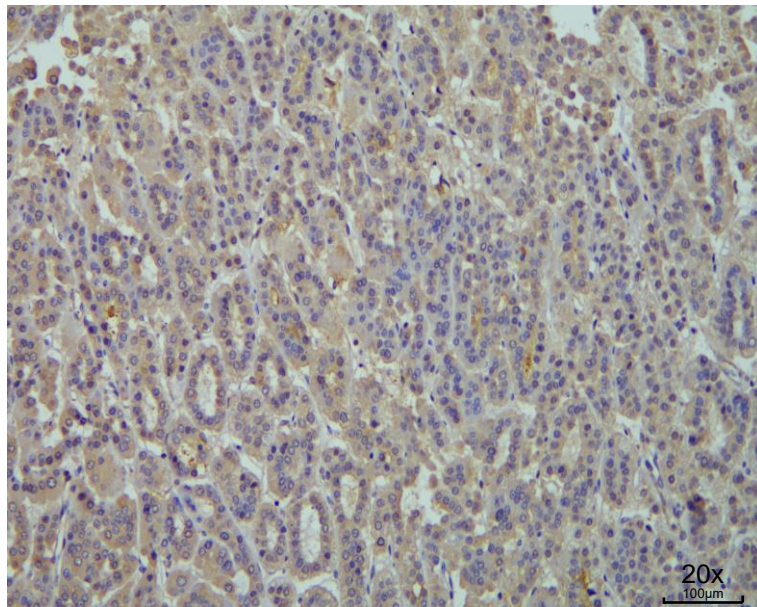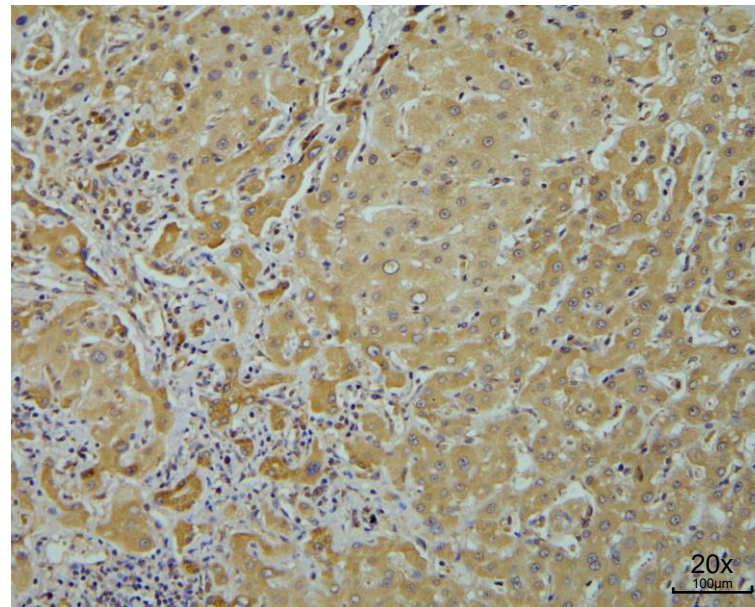



**Low Ki67 expression**

**Patient 15**

**Tumor**

**Adjacent**

**XPO1**

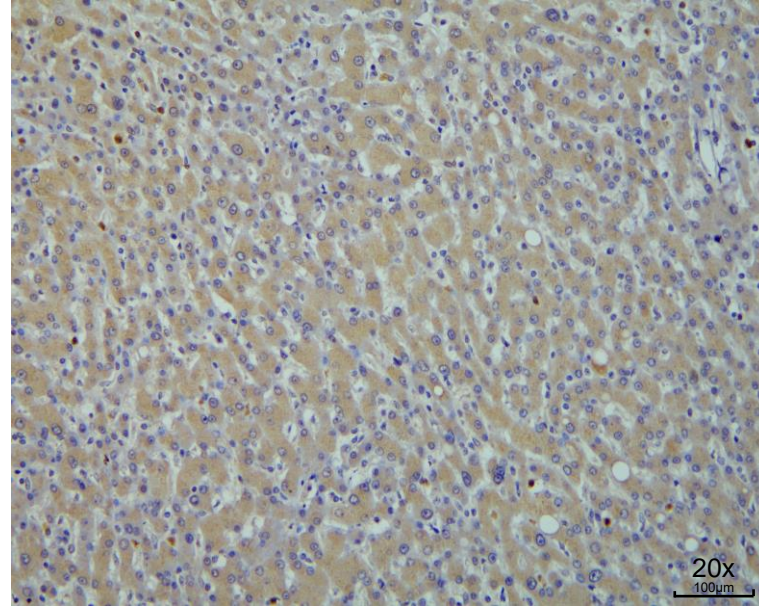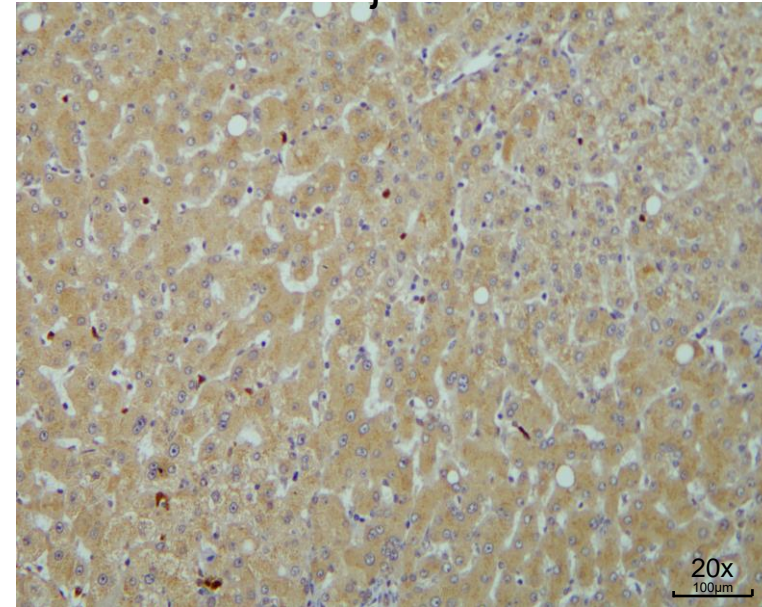

**RCN2**

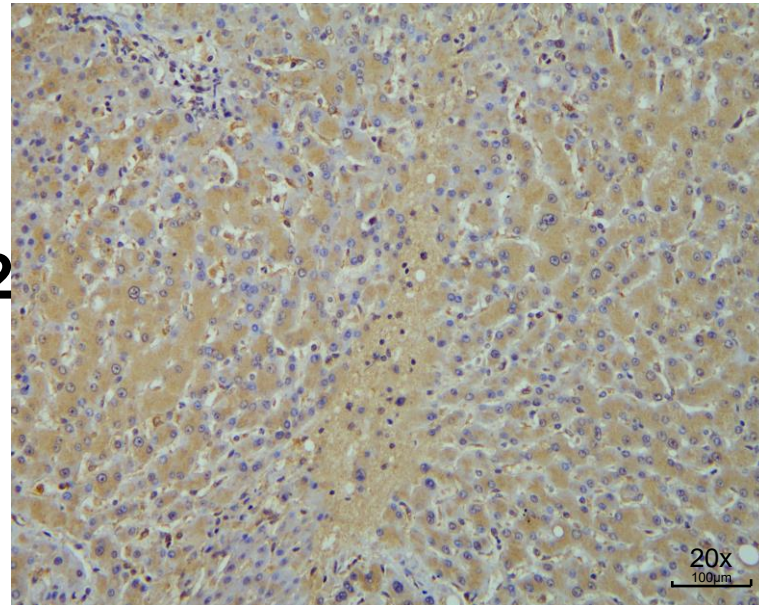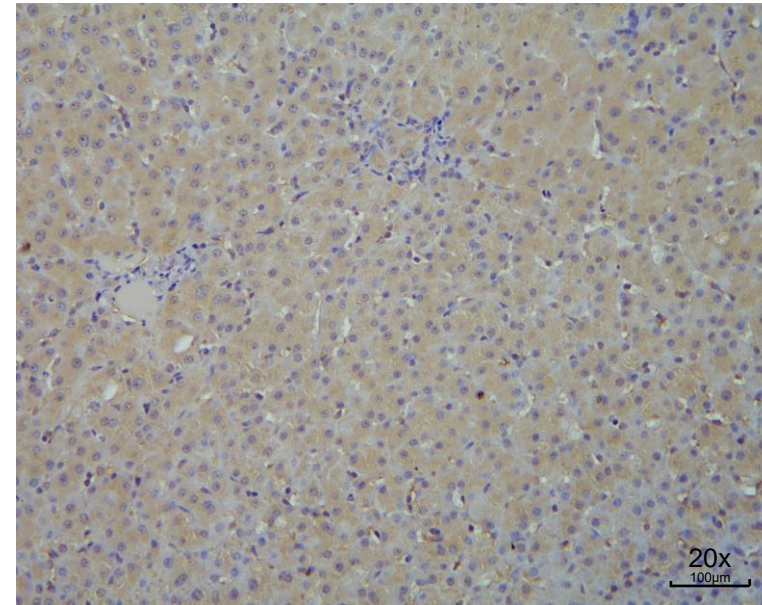



**Low Ki67 expression**

**Patient 16**

**Tumor**

**Adjacent**

**XPO1**

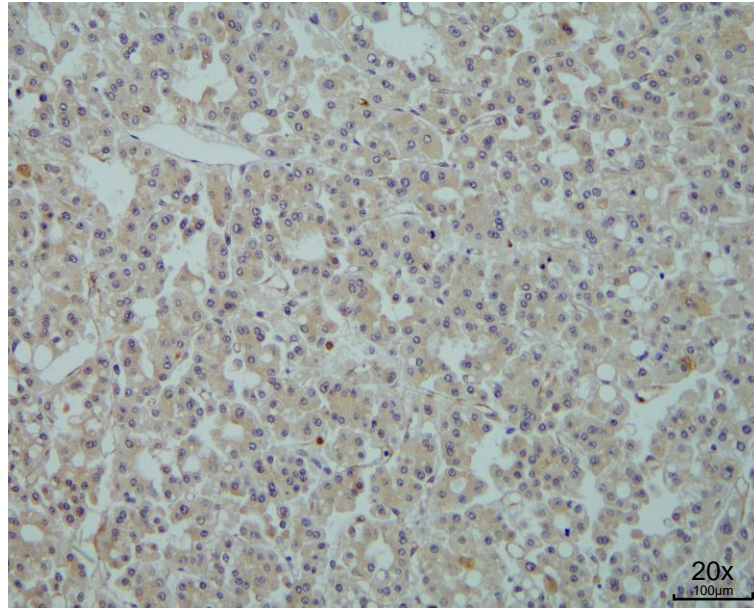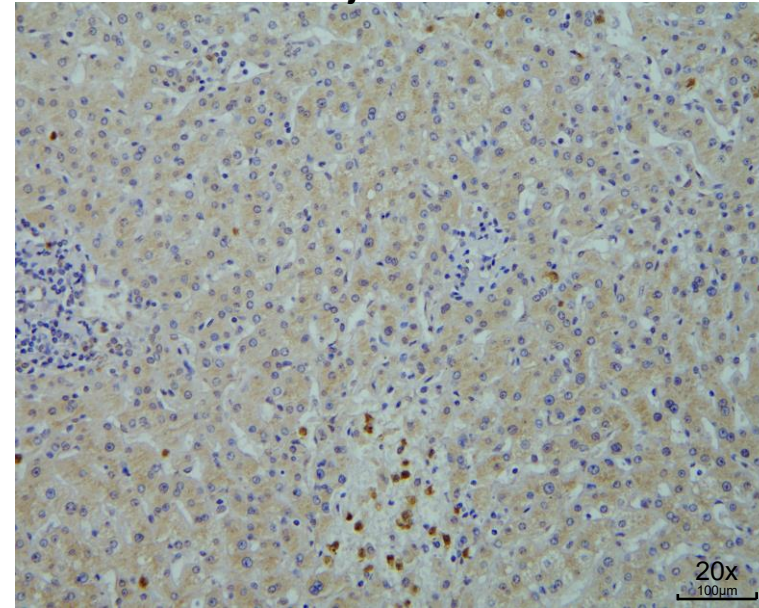

**RCN2**

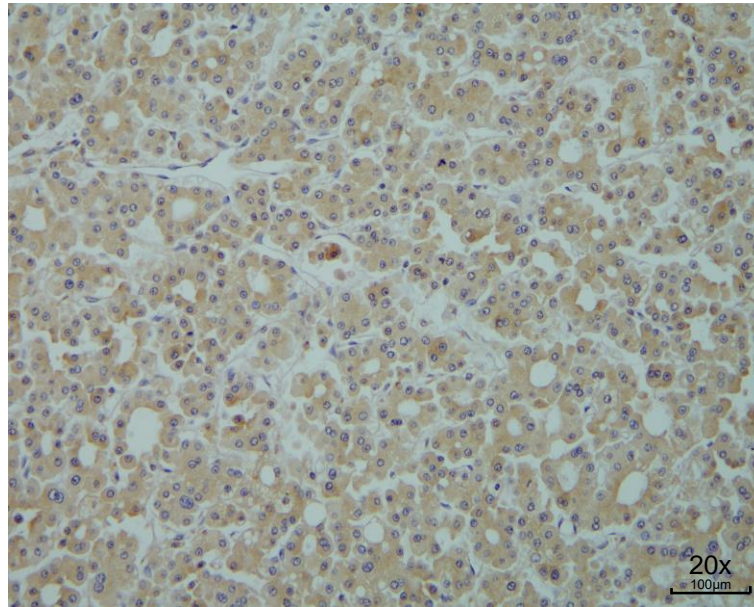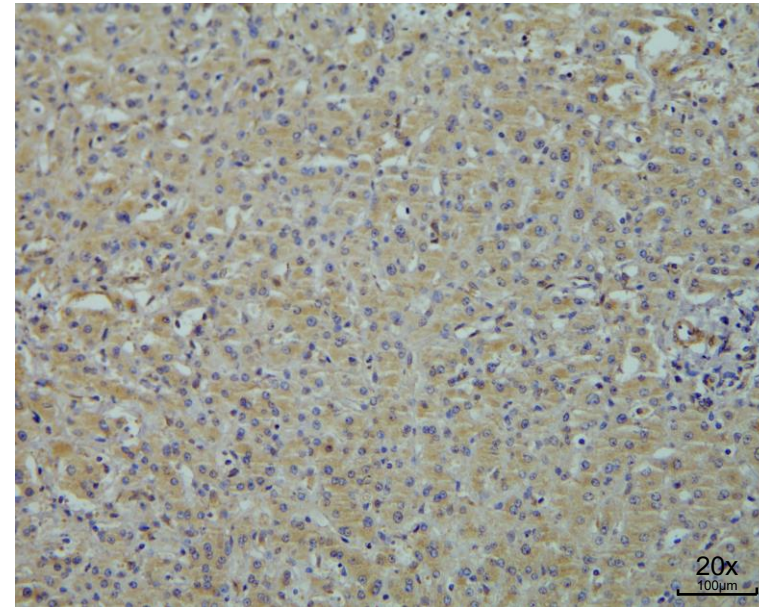



**Low Ki67 expression**

**Patient 17**

**Tumor**

**Adjacent**

**XPO1**

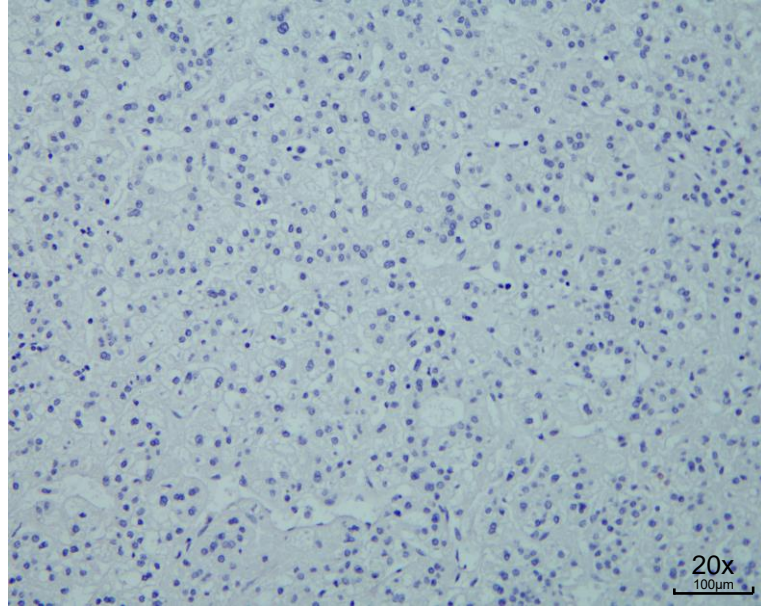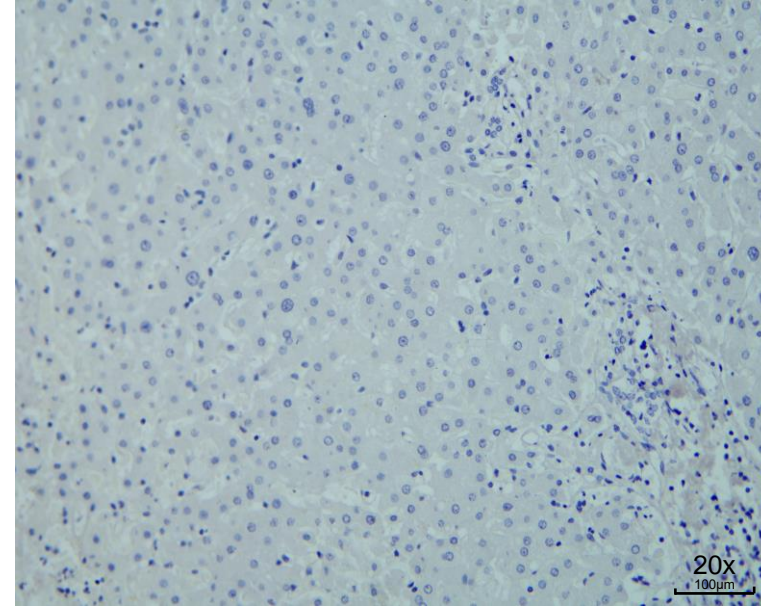

**RCN2**

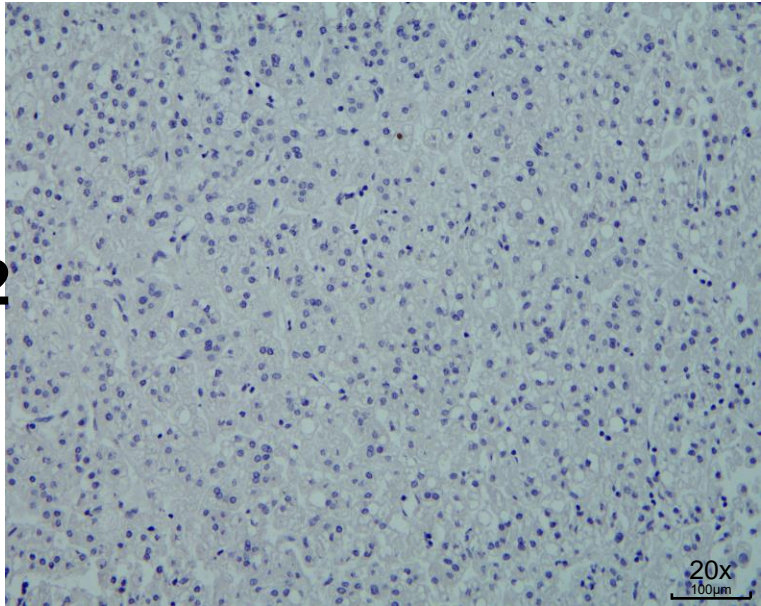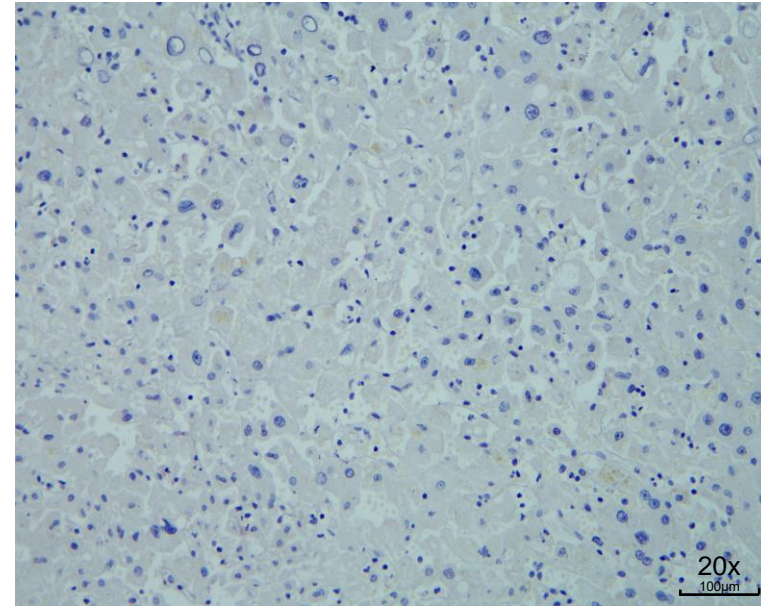

Supplement: Supplementaryfile1.pdf [file Supplementaryfile1.pdf]
